# Supplementary material for: Establishment of a Novel Combined Nomogram for Predicting the Risk of Progression Related to Castration Resistance in Patients With Prostate Cancer
Source: Front Genet. 2022 May 10;13:823716. doi: 10.3389/fgene.2022.823716 (PMC9127235; doi:10.3389/fgene.2022.823716)
Supplement: Supplementary file 8 [file Table4.XLSX]

## Sheet: GSE35988.GO
GroupID	Category	Term	Description	LogP	Log(q-value)	InTerm_InList	Genes	Symbols
1_Summary	GO Cellular Components	GO:0062023	collagen-containing extracellular matrix	-34.7217	-30.3698	87/426	2,165,283,301,309,1191,1285,1286,1288,1291,1292,1296,1305,1306,1307,1359,1464,1490,1511,1634,1690,1805,1992,2161,2162,2192,2200,2202,2331,3490,3574,3908,3956,3958,4016,4052,4060,4147,4239,4256,4313,4653,4969,5176,5212,5272,5359,5654,5660,5764,5919,6275,6277,6387,6422,6423,7041,7043,7060,7078,7177,7373,8404,8406,8547,9068,10082,10218,10418,10875,11095,11096,22795,23213,25878,25890,55214,80760,8102…	A2M,AEBP1,ANG,ANXA1,ANXA6,CLU,COL4A3,COL4A4,COL4A6,COL6A1,COL6A2,COL8A2,COL13A1,COL15A1,COL16A1,CPA3,CSPG4,CCN2,CTSG,DCN,COCH,DPT,SERPINB1,F12,F13A1,FBLN1,FBN1,EFEMP1,FMOD,IGFBP7,IL7,LAMA2,LGALS1,LGALS3,LOXL1,LTBP1,LUM,MATN2,MFAP4,MGP,MMP2,MYOC,OGN,SERPINF1,VIT,SERPINB9,PLSCR1,HTRA1,PSAP,PTN,RARRES2,S100A4,S100A6,CXCL12,SFRP1,SFRP2,TGFB1I1,TGFB3,THBS4,TIMP3,TPSAB1,COL14A1,SPARCL1,SRPX,FCN3,ANGPTL…
1_Member	GO Cellular Components	GO:0062023	collagen-containing extracellular matrix	-34.7217	-30.3698	87/426	2,165,283,301,309,1191,1285,1286,1288,1291,1292,1296,1305,1306,1307,1359,1464,1490,1511,1634,1690,1805,1992,2161,2162,2192,2200,2202,2331,3490,3574,3908,3956,3958,4016,4052,4060,4147,4239,4256,4313,4653,4969,5176,5212,5272,5359,5654,5660,5764,5919,6275,6277,6387,6422,6423,7041,7043,7060,7078,7177,7373,8404,8406,8547,9068,10082,10218,10418,10875,11095,11096,22795,23213,25878,25890,55214,80760,8102…	A2M,AEBP1,ANG,ANXA1,ANXA6,CLU,COL4A3,COL4A4,COL4A6,COL6A1,COL6A2,COL8A2,COL13A1,COL15A1,COL16A1,CPA3,CSPG4,CCN2,CTSG,DCN,COCH,DPT,SERPINB1,F12,F13A1,FBLN1,FBN1,EFEMP1,FMOD,IGFBP7,IL7,LAMA2,LGALS1,LGALS3,LOXL1,LTBP1,LUM,MATN2,MFAP4,MGP,MMP2,MYOC,OGN,SERPINF1,VIT,SERPINB9,PLSCR1,HTRA1,PSAP,PTN,RARRES2,S100A4,S100A6,CXCL12,SFRP1,SFRP2,TGFB1I1,TGFB3,THBS4,TIMP3,TPSAB1,COL14A1,SPARCL1,SRPX,FCN3,ANGPTL…
1_Member	GO Cellular Components	GO:0031012	extracellular matrix	-33.9893	-30.048	100/570	2,165,283,301,309,1191,1285,1286,1288,1291,1292,1296,1305,1306,1307,1359,1464,1490,1511,1634,1690,1805,1842,1992,2161,2162,2192,2200,2202,2331,3490,3574,3908,3956,3958,4016,4052,4060,4147,4239,4256,4313,4320,4653,4969,5176,5212,5272,5359,5654,5660,5764,5919,6275,6277,6387,6422,6423,7041,7043,7049,7060,7078,7098,7177,7373,7473,8404,8406,8547,8839,9068,10082,10218,10418,10875,11095,11096,22795,2321…	A2M,AEBP1,ANG,ANXA1,ANXA6,CLU,COL4A3,COL4A4,COL4A6,COL6A1,COL6A2,COL8A2,COL13A1,COL15A1,COL16A1,CPA3,CSPG4,CCN2,CTSG,DCN,COCH,DPT,ECM2,SERPINB1,F12,F13A1,FBLN1,FBN1,EFEMP1,FMOD,IGFBP7,IL7,LAMA2,LGALS1,LGALS3,LOXL1,LTBP1,LUM,MATN2,MFAP4,MGP,MMP2,MMP11,MYOC,OGN,SERPINF1,VIT,SERPINB9,PLSCR1,HTRA1,PSAP,PTN,RARRES2,S100A4,S100A6,CXCL12,SFRP1,SFRP2,TGFB1I1,TGFB3,TGFBR3,THBS4,TIMP3,TLR3,TPSAB1,COL14A1,W…
1_Member	GO Cellular Components	GO:0030312	external encapsulating structure	-33.9228	-30.048	100/571	2,165,283,301,309,1191,1285,1286,1288,1291,1292,1296,1305,1306,1307,1359,1464,1490,1511,1634,1690,1805,1842,1992,2161,2162,2192,2200,2202,2331,3490,3574,3908,3956,3958,4016,4052,4060,4147,4239,4256,4313,4320,4653,4969,5176,5212,5272,5359,5654,5660,5764,5919,6275,6277,6387,6422,6423,7041,7043,7049,7060,7078,7098,7177,7373,7473,8404,8406,8547,8839,9068,10082,10218,10418,10875,11095,11096,22795,2321…	A2M,AEBP1,ANG,ANXA1,ANXA6,CLU,COL4A3,COL4A4,COL4A6,COL6A1,COL6A2,COL8A2,COL13A1,COL15A1,COL16A1,CPA3,CSPG4,CCN2,CTSG,DCN,COCH,DPT,ECM2,SERPINB1,F12,F13A1,FBLN1,FBN1,EFEMP1,FMOD,IGFBP7,IL7,LAMA2,LGALS1,LGALS3,LOXL1,LTBP1,LUM,MATN2,MFAP4,MGP,MMP2,MMP11,MYOC,OGN,SERPINF1,VIT,SERPINB9,PLSCR1,HTRA1,PSAP,PTN,RARRES2,S100A4,S100A6,CXCL12,SFRP1,SFRP2,TGFB1I1,TGFB3,TGFBR3,THBS4,TIMP3,TLR3,TPSAB1,COL14A1,W…
1_Member	GO Biological Processes	GO:0030198	extracellular matrix organization	-15.4274	-12.709	49/302	165,857,1285,1286,1288,1296,1305,1306,1307,1490,1511,1513,1803,1805,1842,2192,2294,2296,2331,2621,2824,2934,4016,4060,4239,4313,4320,4629,4921,5212,6423,7177,7373,10218,10630,11095,11096,22795,23127,23213,23768,60484,60495,79625,84168,133584,151887,169044,255743	AEBP1,CAV1,COL4A3,COL4A4,COL4A6,COL8A2,COL13A1,COL15A1,COL16A1,CCN2,CTSG,CTSK,DPP4,DPT,ECM2,FBLN1,FOXF1,FOXC1,FMOD,GAS6,GPM6B,GSN,LOXL1,LUM,MFAP4,MMP2,MMP11,MYH11,DDR2,VIT,SFRP2,TPSAB1,COL14A1,ANGPTL7,PDPN,ADAMTS8,ADAMTS5,NID2,COLGALT2,SULF1,FLRT2,HAPLN2,HPSE2,NDNF,ANTXR1,EGFLAM,CCDC80,COL22A1,NPNT
1_Member	GO Biological Processes	GO:0043062	extracellular structure organization	-15.3684	-12.6792	49/303	165,857,1285,1286,1288,1296,1305,1306,1307,1490,1511,1513,1803,1805,1842,2192,2294,2296,2331,2621,2824,2934,4016,4060,4239,4313,4320,4629,4921,5212,6423,7177,7373,10218,10630,11095,11096,22795,23127,23213,23768,60484,60495,79625,84168,133584,151887,169044,255743	AEBP1,CAV1,COL4A3,COL4A4,COL4A6,COL8A2,COL13A1,COL15A1,COL16A1,CCN2,CTSG,CTSK,DPP4,DPT,ECM2,FBLN1,FOXF1,FOXC1,FMOD,GAS6,GPM6B,GSN,LOXL1,LUM,MFAP4,MMP2,MMP11,MYH11,DDR2,VIT,SFRP2,TPSAB1,COL14A1,ANGPTL7,PDPN,ADAMTS8,ADAMTS5,NID2,COLGALT2,SULF1,FLRT2,HAPLN2,HPSE2,NDNF,ANTXR1,EGFLAM,CCDC80,COL22A1,NPNT
1_Member	GO Biological Processes	GO:0045229	external encapsulating structure organization	-15.251	-12.5712	49/305	165,857,1285,1286,1288,1296,1305,1306,1307,1490,1511,1513,1803,1805,1842,2192,2294,2296,2331,2621,2824,2934,4016,4060,4239,4313,4320,4629,4921,5212,6423,7177,7373,10218,10630,11095,11096,22795,23127,23213,23768,60484,60495,79625,84168,133584,151887,169044,255743	AEBP1,CAV1,COL4A3,COL4A4,COL4A6,COL8A2,COL13A1,COL15A1,COL16A1,CCN2,CTSG,CTSK,DPP4,DPT,ECM2,FBLN1,FOXF1,FOXC1,FMOD,GAS6,GPM6B,GSN,LOXL1,LUM,MFAP4,MMP2,MMP11,MYH11,DDR2,VIT,SFRP2,TPSAB1,COL14A1,ANGPTL7,PDPN,ADAMTS8,ADAMTS5,NID2,COLGALT2,SULF1,FLRT2,HAPLN2,HPSE2,NDNF,ANTXR1,EGFLAM,CCDC80,COL22A1,NPNT
1_Member	GO Molecular Functions	GO:0005201	extracellular matrix structural constituent	-15.0248	-12.3718	36/172	165,1285,1286,1288,1291,1292,1296,1305,1306,1307,1634,1805,2192,2200,2202,2331,3490,3908,4052,4060,4147,4239,4256,4969,7373,8406,10418,10875,22795,25878,25890,81578,127435,157869,169044,255743	AEBP1,COL4A3,COL4A4,COL4A6,COL6A1,COL6A2,COL8A2,COL13A1,COL15A1,COL16A1,DCN,DPT,FBLN1,FBN1,EFEMP1,FMOD,IGFBP7,LAMA2,LTBP1,LUM,MATN2,MFAP4,MGP,OGN,COL14A1,SRPX,SPON1,FGL2,NID2,MXRA5,ABI3BP,COL21A1,PODN,SBSPON,COL22A1,NPNT
1_Member	GO Molecular Functions	GO:0005198	structural molecule activity	-8.17638	-6.24771	64/706	60,165,1285,1286,1288,1291,1292,1296,1305,1306,1307,1410,1465,1634,1674,1805,2192,2200,2202,2331,3123,3316,3490,3908,4052,4060,4118,4147,4239,4256,4629,4637,4969,5239,5354,6525,7169,7373,7414,7431,8406,9172,9499,10398,10418,10875,22795,23136,23336,24146,25878,25890,25984,26052,54221,81578,83742,91624,125113,127435,157869,169044,255743,345651	ACTB,AEBP1,COL4A3,COL4A4,COL4A6,COL6A1,COL6A2,COL8A2,COL13A1,COL15A1,COL16A1,CRYAB,CSRP1,DCN,DES,DPT,FBLN1,FBN1,EFEMP1,FMOD,HLA-DRB1,HSPB2,IGFBP7,LAMA2,LTBP1,LUM,MAL,MATN2,MFAP4,MGP,MYH11,MYL6,OGN,PGM5,PLP1,SMTN,TPM2,COL14A1,VCL,VIM,SRPX,MYOM2,MYOT,MYL9,SPON1,FGL2,NID2,EPB41L3,SYNM,CLDN15,MXRA5,ABI3BP,KRT23,DNM3,SNTG2,COL21A1,MARVELD1,NEXN,KRT222,PODN,SBSPON,COL22A1,NPNT,ACTBL2
1_Member	GO Cellular Components	GO:0005604	basement membrane	-7.82737	-5.93334	19/96	283,1285,1286,1288,1296,1306,2192,2200,3908,4016,5176,5764,7060,22795,55214,133584,151887,158326,255743	ANG,COL4A3,COL4A4,COL4A6,COL8A2,COL15A1,FBLN1,FBN1,LAMA2,LOXL1,SERPINF1,PTN,THBS4,NID2,P3H2,EGFLAM,CCDC80,FREM1,NPNT
2_Summary	GO Biological Processes	GO:0050865	regulation of cell activation	-27.8409	-24.0911	98/650	199,301,384,558,640,652,683,695,857,912,914,930,939,940,945,952,972,1236,1490,1803,1880,2213,2294,2621,2736,2737,3071,3113,3115,3118,3119,3120,3122,3123,3125,3126,3127,3134,3398,3479,3574,3575,3598,3600,3606,3684,3956,3958,4208,4332,4345,4352,5321,5341,5359,5592,5788,6352,6363,6376,6403,6422,6504,6622,6666,7412,7535,7805,7940,8530,8543,8832,10333,10630,10875,11035,23208,26191,27240,29851,30009,30…	AIF1,ANXA1,ARG2,AXL,BLK,BMP4,BST1,BTK,CAV1,CD1D,CD2,CD19,CD27,CD28,CD33,CD38,CD74,CCR7,CCN2,DPP4,GPR183,FCGR2B,FOXF1,GAS6,GLI2,GLI3,NCKAP1L,HLA-DPA1,HLA-DPB1,HLA-DQA2,HLA-DQB1,HLA-DQB2,HLA-DRA,HLA-DRB1,HLA-DRB3,HLA-DRB4,HLA-DRB5,HLA-F,ID2,IGF1,IL7,IL7R,IL13RA2,IL15,IL18,ITGAM,LGALS1,LGALS3,MEF2C,MNDA,CD200,MPL,PLA2G4A,PLEK,PLSCR1,PRKG1,PTPRC,CCL5,CCL19,CX3CL1,SELP,SFRP1,SLAMF1,SNCA,SOX12,VCAM1,ZA…
2_Member	GO Biological Processes	GO:0050865	regulation of cell activation	-27.8409	-24.0911	98/650	199,301,384,558,640,652,683,695,857,912,914,930,939,940,945,952,972,1236,1490,1803,1880,2213,2294,2621,2736,2737,3071,3113,3115,3118,3119,3120,3122,3123,3125,3126,3127,3134,3398,3479,3574,3575,3598,3600,3606,3684,3956,3958,4208,4332,4345,4352,5321,5341,5359,5592,5788,6352,6363,6376,6403,6422,6504,6622,6666,7412,7535,7805,7940,8530,8543,8832,10333,10630,10875,11035,23208,26191,27240,29851,30009,30…	AIF1,ANXA1,ARG2,AXL,BLK,BMP4,BST1,BTK,CAV1,CD1D,CD2,CD19,CD27,CD28,CD33,CD38,CD74,CCR7,CCN2,DPP4,GPR183,FCGR2B,FOXF1,GAS6,GLI2,GLI3,NCKAP1L,HLA-DPA1,HLA-DPB1,HLA-DQA2,HLA-DQB1,HLA-DQB2,HLA-DRA,HLA-DRB1,HLA-DRB3,HLA-DRB4,HLA-DRB5,HLA-F,ID2,IGF1,IL7,IL7R,IL13RA2,IL15,IL18,ITGAM,LGALS1,LGALS3,MEF2C,MNDA,CD200,MPL,PLA2G4A,PLEK,PLSCR1,PRKG1,PTPRC,CCL5,CCL19,CX3CL1,SELP,SFRP1,SLAMF1,SNCA,SOX12,VCAM1,ZA…
2_Member	GO Biological Processes	GO:0046649	lymphocyte activation	-26.7032	-23.0503	106/771	199,301,384,558,640,652,683,695,857,911,912,914,915,917,925,930,931,939,940,952,972,1236,1794,1803,1880,2213,2322,2621,2736,2737,2841,2934,3071,3113,3115,3118,3119,3120,3122,3123,3125,3126,3127,3134,3394,3398,3479,3574,3575,3600,3606,3676,3683,3702,3815,3821,3956,3958,4208,4332,4352,5087,5295,5336,5450,5532,5579,5788,5796,5873,6352,6363,6422,6504,6666,7412,7535,7805,7940,8324,9452,10320,10875,110…	AIF1,ANXA1,ARG2,AXL,BLK,BMP4,BST1,BTK,CAV1,CD1C,CD1D,CD2,CD3D,CD3G,CD8A,CD19,MS4A1,CD27,CD28,CD38,CD74,CCR7,DOCK2,DPP4,GPR183,FCGR2B,FLT3,GAS6,GLI2,GLI3,GPR18,GSN,NCKAP1L,HLA-DPA1,HLA-DPB1,HLA-DQA2,HLA-DQB1,HLA-DQB2,HLA-DRA,HLA-DRB1,HLA-DRB3,HLA-DRB4,HLA-DRB5,HLA-F,IRF8,ID2,IGF1,IL7,IL7R,IL15,IL18,ITGA4,ITGAL,ITK,KIT,KLRC1,LGALS1,LGALS3,MEF2C,MNDA,MPL,PBX1,PIK3R1,PLCG2,POU2AF1,PPP3CB,PRKCB,PTPRC,…
2_Member	GO Biological Processes	GO:0002694	regulation of leukocyte activation	-25.7255	-22.1517	91/606	199,301,384,558,640,652,683,695,857,912,914,930,939,940,945,952,972,1236,1803,1880,2213,2294,2621,2736,2737,3071,3113,3115,3118,3119,3120,3122,3123,3125,3126,3127,3134,3398,3479,3574,3575,3598,3600,3606,3684,3956,3958,4208,4332,4345,4352,5321,5359,5788,6352,6363,6376,6422,6504,6622,6666,7412,7535,7805,7940,8530,8832,10333,10875,11035,23208,26191,27240,29851,30009,30817,55423,56253,56833,64092,649…	AIF1,ANXA1,ARG2,AXL,BLK,BMP4,BST1,BTK,CAV1,CD1D,CD2,CD19,CD27,CD28,CD33,CD38,CD74,CCR7,DPP4,GPR183,FCGR2B,FOXF1,GAS6,GLI2,GLI3,NCKAP1L,HLA-DPA1,HLA-DPB1,HLA-DQA2,HLA-DQB1,HLA-DQB2,HLA-DRA,HLA-DRB1,HLA-DRB3,HLA-DRB4,HLA-DRB5,HLA-F,ID2,IGF1,IL7,IL7R,IL13RA2,IL15,IL18,ITGAM,LGALS1,LGALS3,MEF2C,MNDA,CD200,MPL,PLA2G4A,PLSCR1,PTPRC,CCL5,CCL19,CX3CL1,SFRP1,SLAMF1,SNCA,SOX12,VCAM1,ZAP70,LAPTM5,LST1,CST7,…
2_Member	GO Biological Processes	GO:0030155	regulation of cell adhesion	-23.5286	-20.0218	99/751	199,240,301,384,397,640,652,683,857,912,939,940,972,1236,1307,1803,1842,1843,1946,2192,2213,2294,2316,2633,2651,2736,2737,2824,3071,3113,3115,3118,3119,3120,3122,3123,3125,3126,3127,3479,3574,3575,3600,3606,3611,3676,3908,3956,3958,4653,5212,5295,5361,5592,5764,5788,5881,6352,6363,6376,6387,6403,6422,6423,6504,6591,6666,7010,7412,7414,7535,7805,8324,8613,8631,9480,9595,10630,10875,11170,23189,261…	AIF1,ALOX5,ANXA1,ARG2,ARHGDIB,BLK,BMP4,BST1,CAV1,CD1D,CD27,CD28,CD74,CCR7,COL16A1,DPP4,ECM2,DUSP1,EFNA5,FBLN1,FCGR2B,FOXF1,FLNA,GBP1,GCNT2,GLI2,GLI3,GPM6B,NCKAP1L,HLA-DPA1,HLA-DPB1,HLA-DQA2,HLA-DQB1,HLA-DQB2,HLA-DRA,HLA-DRB1,HLA-DRB3,HLA-DRB4,HLA-DRB5,IGF1,IL7,IL7R,IL15,IL18,ILK,ITGA4,LAMA2,LGALS1,LGALS3,MYOC,VIT,PIK3R1,PLXNA1,PRKG1,PTN,PTPRC,RAC3,CCL5,CCL19,CX3CL1,CXCL12,SELP,SFRP1,SFRP2,SLAMF1,…
2_Member	GO Biological Processes	GO:1903131	mononuclear cell differentiation	-22.1335	-18.7815	70/426	301,558,640,652,695,912,914,915,917,925,930,931,939,940,972,1236,1436,1794,1880,2213,2322,2621,2736,2737,2841,3071,3106,3122,3123,3394,3398,3428,3574,3575,3600,3606,3676,3702,3815,3821,3956,3958,5087,5295,5336,5450,5532,5788,5796,6363,6422,6504,6666,7412,7535,8324,9452,10320,10537,10875,11035,23228,26191,30009,55619,56253,56833,114548,139818,257101	ANXA1,AXL,BLK,BMP4,BTK,CD1D,CD2,CD3D,CD3G,CD8A,CD19,MS4A1,CD27,CD28,CD74,CCR7,CSF1R,DOCK2,GPR183,FCGR2B,FLT3,GAS6,GLI2,GLI3,GPR18,NCKAP1L,HLA-B,HLA-DRA,HLA-DRB1,IRF8,ID2,IFI16,IL7,IL7R,IL15,IL18,ITGA4,ITK,KIT,KLRC1,LGALS1,LGALS3,PBX1,PIK3R1,PLCG2,POU2AF1,PPP3CB,PTPRC,PTPRK,CCL19,SFRP1,SLAMF1,SOX12,VCAM1,ZAP70,FZD7,ITM2A,IKZF1,UBD,FGL2,RIPK3,PLCL2,PTPN22,TBX21,DOCK10,CRTAM,SLAMF8,NLRP3,DOCK11,ZNF6…
2_Member	GO Biological Processes	GO:0030098	lymphocyte differentiation	-21.3011	-17.9906	64/373	301,558,652,695,912,914,915,917,925,930,931,939,940,972,1236,1794,1880,2213,2322,2621,2736,2737,2841,3071,3122,3123,3394,3398,3574,3575,3600,3606,3676,3702,3815,3821,3956,5087,5295,5336,5450,5532,5788,5796,6363,6422,6504,6666,7412,7535,8324,9452,10320,10875,11035,23228,26191,30009,55619,56253,56833,114548,139818,257101	ANXA1,AXL,BMP4,BTK,CD1D,CD2,CD3D,CD3G,CD8A,CD19,MS4A1,CD27,CD28,CD74,CCR7,DOCK2,GPR183,FCGR2B,FLT3,GAS6,GLI2,GLI3,GPR18,NCKAP1L,HLA-DRA,HLA-DRB1,IRF8,ID2,IL7,IL7R,IL15,IL18,ITGA4,ITK,KIT,KLRC1,LGALS1,PBX1,PIK3R1,PLCG2,POU2AF1,PPP3CB,PTPRC,PTPRK,CCL19,SFRP1,SLAMF1,SOX12,VCAM1,ZAP70,FZD7,ITM2A,IKZF1,FGL2,RIPK3,PLCL2,PTPN22,TBX21,DOCK10,CRTAM,SLAMF8,NLRP3,DOCK11,ZNF683
2_Member	GO Biological Processes	GO:0002521	leukocyte differentiation	-20.9177	-17.6797	78/542	301,558,640,652,695,912,914,915,917,925,930,931,939,940,972,1236,1436,1794,1880,2124,2200,2213,2322,2621,2736,2737,2841,3059,3071,3106,3122,3123,3394,3398,3428,3574,3575,3600,3606,3676,3702,3815,3821,3956,3958,4254,5087,5295,5336,5450,5532,5788,5796,6363,6422,6504,6666,7097,7098,7412,7535,8324,9452,10100,10320,10537,10875,11035,23228,26191,30009,55619,56253,56833,114548,139716,139818,257101	ANXA1,AXL,BLK,BMP4,BTK,CD1D,CD2,CD3D,CD3G,CD8A,CD19,MS4A1,CD27,CD28,CD74,CCR7,CSF1R,DOCK2,GPR183,EVI2B,FBN1,FCGR2B,FLT3,GAS6,GLI2,GLI3,GPR18,HCLS1,NCKAP1L,HLA-B,HLA-DRA,HLA-DRB1,IRF8,ID2,IFI16,IL7,IL7R,IL15,IL18,ITGA4,ITK,KIT,KLRC1,LGALS1,LGALS3,KITLG,PBX1,PIK3R1,PLCG2,POU2AF1,PPP3CB,PTPRC,PTPRK,CCL19,SFRP1,SLAMF1,SOX12,TLR2,TLR3,VCAM1,ZAP70,FZD7,ITM2A,TSPAN2,IKZF1,UBD,FGL2,RIPK3,PLCL2,PTPN22,TBX…
2_Member	GO Biological Processes	GO:0042110	T cell activation	-20.1732	-17.018	72/484	199,301,384,652,857,911,912,914,915,917,925,939,940,972,1236,1794,1803,1880,2213,2736,2737,2841,2934,3071,3113,3115,3118,3119,3120,3122,3123,3125,3126,3127,3479,3574,3575,3600,3606,3683,3702,3815,3821,3956,3958,5532,5788,5796,5873,6352,6363,6504,6666,7412,7535,7805,8324,10875,11035,26191,27240,29851,30009,54518,55423,56253,64926,79626,114548,120425,201633,257101	AIF1,ANXA1,ARG2,BMP4,CAV1,CD1C,CD1D,CD2,CD3D,CD3G,CD8A,CD27,CD28,CD74,CCR7,DOCK2,DPP4,GPR183,FCGR2B,GLI2,GLI3,GPR18,GSN,NCKAP1L,HLA-DPA1,HLA-DPB1,HLA-DQA2,HLA-DQB1,HLA-DQB2,HLA-DRA,HLA-DRB1,HLA-DRB3,HLA-DRB4,HLA-DRB5,IGF1,IL7,IL7R,IL15,IL18,ITGAL,ITK,KIT,KLRC1,LGALS1,LGALS3,PPP3CB,PTPRC,PTPRK,RAB27A,CCL5,CCL19,SLAMF1,SOX12,VCAM1,ZAP70,LAPTM5,FZD7,FGL2,RIPK3,PTPN22,SIT1,ICOS,TBX21,APBB1IP,SIRPG,CR…
2_Member	GO Biological Processes	GO:0045785	positive regulation of cell adhesion	-20.1657	-17.018	68/437	199,240,301,857,912,939,940,972,1236,1307,1803,1842,2294,2316,2651,2736,2737,3071,3113,3115,3118,3119,3120,3122,3123,3125,3126,3127,3479,3574,3575,3600,3606,3611,3676,3956,4653,5212,5764,5788,5881,6352,6363,6376,6387,6403,6422,6423,6504,6666,7010,7412,7535,8613,8631,10630,26191,29851,54518,55423,55679,64926,78986,79625,114548,133584,151887,255743	AIF1,ALOX5,ANXA1,CAV1,CD1D,CD27,CD28,CD74,CCR7,COL16A1,DPP4,ECM2,FOXF1,FLNA,GCNT2,GLI2,GLI3,NCKAP1L,HLA-DPA1,HLA-DPB1,HLA-DQA2,HLA-DQB1,HLA-DQB2,HLA-DRA,HLA-DRB1,HLA-DRB3,HLA-DRB4,HLA-DRB5,IGF1,IL7,IL7R,IL15,IL18,ILK,ITGA4,LGALS1,MYOC,VIT,PTN,PTPRC,RAC3,CCL5,CCL19,CX3CL1,CXCL12,SELP,SFRP1,SFRP2,SLAMF1,SOX12,TEK,VCAM1,ZAP70,PLPP3,SKAP1,PDPN,PTPN22,ICOS,APBB1IP,SIRPG,LIMS2,RASAL3,DUSP26,NDNF,NLRP3,…
2_Member	GO Biological Processes	GO:0051249	regulation of lymphocyte activation	-19.2178	-16.1446	73/515	199,301,384,558,640,652,683,695,857,912,914,930,939,940,952,972,1236,1803,1880,2213,2621,2736,2737,3071,3113,3115,3118,3119,3120,3122,3123,3125,3126,3127,3134,3398,3479,3574,3575,3600,3606,3956,3958,4208,4332,4352,5788,6352,6363,6422,6504,6666,7412,7535,7805,7940,10875,11035,26191,27240,29851,30009,55423,56253,56833,64092,64926,79626,114548,201633,257101,374403,100423062	AIF1,ANXA1,ARG2,AXL,BLK,BMP4,BST1,BTK,CAV1,CD1D,CD2,CD19,CD27,CD28,CD38,CD74,CCR7,DPP4,GPR183,FCGR2B,GAS6,GLI2,GLI3,NCKAP1L,HLA-DPA1,HLA-DPB1,HLA-DQA2,HLA-DQB1,HLA-DQB2,HLA-DRA,HLA-DRB1,HLA-DRB3,HLA-DRB4,HLA-DRB5,HLA-F,ID2,IGF1,IL7,IL7R,IL15,IL18,LGALS1,LGALS3,MEF2C,MNDA,MPL,PTPRC,CCL5,CCL19,SFRP1,SLAMF1,SOX12,VCAM1,ZAP70,LAPTM5,LST1,FGL2,RIPK3,PTPN22,SIT1,ICOS,TBX21,SIRPG,CRTAM,SLAMF8,SAMSN1,RAS…
2_Member	GO Biological Processes	GO:0007159	leukocyte cell-cell adhesion	-18.026	-15.0543	59/371	199,240,301,384,652,857,912,939,940,972,1236,1524,1803,2213,2736,2737,3071,3113,3115,3118,3119,3120,3122,3123,3125,3126,3127,3479,3574,3575,3600,3606,3676,3683,3956,3958,4907,5788,6352,6363,6387,6403,6504,6666,7412,7535,7805,8631,10875,26191,29851,30009,55423,56253,58494,64926,79626,114548,201633	AIF1,ALOX5,ANXA1,ARG2,BMP4,CAV1,CD1D,CD27,CD28,CD74,CCR7,CX3CR1,DPP4,FCGR2B,GLI2,GLI3,NCKAP1L,HLA-DPA1,HLA-DPB1,HLA-DQA2,HLA-DQB1,HLA-DQB2,HLA-DRA,HLA-DRB1,HLA-DRB3,HLA-DRB4,HLA-DRB5,IGF1,IL7,IL7R,IL15,IL18,ITGA4,ITGAL,LGALS1,LGALS3,NT5E,PTPRC,CCL5,CCL19,CXCL12,SELP,SLAMF1,SOX12,VCAM1,ZAP70,LAPTM5,SKAP1,FGL2,PTPN22,ICOS,TBX21,SIRPG,CRTAM,JAM2,RASAL3,TNFAIP8L2,NLRP3,TIGIT
2_Member	GO Biological Processes	GO:1903037	regulation of leukocyte cell-cell adhesion	-17.4208	-14.4668	55/336	199,240,301,384,652,857,912,939,940,972,1236,1803,2213,2736,2737,3071,3113,3115,3118,3119,3120,3122,3123,3125,3126,3127,3479,3574,3575,3600,3606,3676,3956,3958,5788,6352,6363,6387,6403,6504,6666,7412,7535,7805,8631,10875,26191,29851,30009,55423,56253,64926,79626,114548,201633	AIF1,ALOX5,ANXA1,ARG2,BMP4,CAV1,CD1D,CD27,CD28,CD74,CCR7,DPP4,FCGR2B,GLI2,GLI3,NCKAP1L,HLA-DPA1,HLA-DPB1,HLA-DQA2,HLA-DQB1,HLA-DQB2,HLA-DRA,HLA-DRB1,HLA-DRB3,HLA-DRB4,HLA-DRB5,IGF1,IL7,IL7R,IL15,IL18,ITGA4,LGALS1,LGALS3,PTPRC,CCL5,CCL19,CXCL12,SELP,SLAMF1,SOX12,VCAM1,ZAP70,LAPTM5,SKAP1,FGL2,PTPN22,ICOS,TBX21,SIRPG,CRTAM,RASAL3,TNFAIP8L2,NLRP3,TIGIT
2_Member	GO Biological Processes	GO:0050863	regulation of T cell activation	-17.108	-14.2185	54/330	199,301,384,652,857,912,914,939,940,972,1236,1803,2213,2736,2737,3071,3113,3115,3118,3119,3120,3122,3123,3125,3126,3127,3479,3574,3575,3600,3606,3956,3958,5788,6352,6363,6504,6666,7412,7535,7805,10875,11035,26191,27240,29851,30009,55423,56253,64926,79626,114548,201633,257101	AIF1,ANXA1,ARG2,BMP4,CAV1,CD1D,CD2,CD27,CD28,CD74,CCR7,DPP4,FCGR2B,GLI2,GLI3,NCKAP1L,HLA-DPA1,HLA-DPB1,HLA-DQA2,HLA-DQB1,HLA-DQB2,HLA-DRA,HLA-DRB1,HLA-DRB3,HLA-DRB4,HLA-DRB5,IGF1,IL7,IL7R,IL15,IL18,LGALS1,LGALS3,PTPRC,CCL5,CCL19,SLAMF1,SOX12,VCAM1,ZAP70,LAPTM5,FGL2,RIPK3,PTPN22,SIT1,ICOS,TBX21,SIRPG,CRTAM,RASAL3,TNFAIP8L2,NLRP3,TIGIT,ZNF683
2_Member	GO Biological Processes	GO:0050867	positive regulation of cell activation	-16.6521	-13.8183	61/420	199,301,558,683,695,857,912,914,939,940,952,972,1236,1490,1803,1880,2621,2736,2737,3071,3113,3115,3118,3119,3120,3122,3123,3125,3126,3127,3134,3479,3574,3575,3600,3606,3684,3956,4208,4352,5321,5341,5788,6352,6363,6403,6504,6666,7412,7535,10333,26191,29851,30009,55423,64926,85480,90865,114548,120892,100423062	AIF1,ANXA1,AXL,BST1,BTK,CAV1,CD1D,CD2,CD27,CD28,CD38,CD74,CCR7,CCN2,DPP4,GPR183,GAS6,GLI2,GLI3,NCKAP1L,HLA-DPA1,HLA-DPB1,HLA-DQA2,HLA-DQB1,HLA-DQB2,HLA-DRA,HLA-DRB1,HLA-DRB3,HLA-DRB4,HLA-DRB5,HLA-F,IGF1,IL7,IL7R,IL15,IL18,ITGAM,LGALS1,MEF2C,MPL,PLA2G4A,PLEK,PTPRC,CCL5,CCL19,SELP,SLAMF1,SOX12,VCAM1,ZAP70,TLR6,PTPN22,ICOS,TBX21,SIRPG,RASAL3,TSLP,IL33,NLRP3,LRRK2,IGLL5
2_Member	GO Biological Processes	GO:1903039	positive regulation of leukocyte cell-cell adhesion	-15.999	-13.2153	44/239	199,240,301,857,912,939,940,972,1236,1803,2736,2737,3071,3113,3115,3118,3119,3120,3122,3123,3125,3126,3127,3479,3574,3575,3600,3606,3676,3956,5788,6352,6363,6403,6504,6666,7412,7535,8631,26191,29851,55423,64926,114548	AIF1,ALOX5,ANXA1,CAV1,CD1D,CD27,CD28,CD74,CCR7,DPP4,GLI2,GLI3,NCKAP1L,HLA-DPA1,HLA-DPB1,HLA-DQA2,HLA-DQB1,HLA-DQB2,HLA-DRA,HLA-DRB1,HLA-DRB3,HLA-DRB4,HLA-DRB5,IGF1,IL7,IL7R,IL15,IL18,ITGA4,LGALS1,PTPRC,CCL5,CCL19,SELP,SLAMF1,SOX12,VCAM1,ZAP70,SKAP1,PTPN22,ICOS,SIRPG,RASAL3,NLRP3
2_Member	GO Biological Processes	GO:0022409	positive regulation of cell-cell adhesion	-15.8468	-13.0859	48/284	199,240,301,857,912,939,940,972,1236,1803,2651,2736,2737,3071,3113,3115,3118,3119,3120,3122,3123,3125,3126,3127,3479,3574,3575,3600,3606,3676,3956,5788,6352,6363,6376,6403,6504,6666,7412,7535,8613,8631,10630,26191,29851,55423,64926,114548	AIF1,ALOX5,ANXA1,CAV1,CD1D,CD27,CD28,CD74,CCR7,DPP4,GCNT2,GLI2,GLI3,NCKAP1L,HLA-DPA1,HLA-DPB1,HLA-DQA2,HLA-DQB1,HLA-DQB2,HLA-DRA,HLA-DRB1,HLA-DRB3,HLA-DRB4,HLA-DRB5,IGF1,IL7,IL7R,IL15,IL18,ITGA4,LGALS1,PTPRC,CCL5,CCL19,CX3CL1,SELP,SLAMF1,SOX12,VCAM1,ZAP70,PLPP3,SKAP1,PDPN,PTPN22,ICOS,SIRPG,RASAL3,NLRP3
2_Member	GO Biological Processes	GO:0022407	regulation of cell-cell adhesion	-15.7913	-13.0521	62/450	199,240,301,384,640,652,857,912,939,940,972,1236,1803,1946,2213,2651,2736,2737,3071,3113,3115,3118,3119,3120,3122,3123,3125,3126,3127,3479,3574,3575,3600,3606,3676,3956,3958,5592,5788,6352,6363,6376,6387,6403,6504,6666,7412,7535,7805,8613,8631,10630,10875,26191,29851,30009,55423,56253,64926,79626,114548,201633	AIF1,ALOX5,ANXA1,ARG2,BLK,BMP4,CAV1,CD1D,CD27,CD28,CD74,CCR7,DPP4,EFNA5,FCGR2B,GCNT2,GLI2,GLI3,NCKAP1L,HLA-DPA1,HLA-DPB1,HLA-DQA2,HLA-DQB1,HLA-DQB2,HLA-DRA,HLA-DRB1,HLA-DRB3,HLA-DRB4,HLA-DRB5,IGF1,IL7,IL7R,IL15,IL18,ITGA4,LGALS1,LGALS3,PRKG1,PTPRC,CCL5,CCL19,CX3CL1,CXCL12,SELP,SLAMF1,SOX12,VCAM1,ZAP70,LAPTM5,PLPP3,SKAP1,PDPN,FGL2,PTPN22,ICOS,TBX21,SIRPG,CRTAM,RASAL3,TNFAIP8L2,NLRP3,TIGIT
2_Member	GO Biological Processes	GO:0002696	positive regulation of leukocyte activation	-15.3804	-12.6817	58/409	199,301,558,683,695,857,912,914,939,940,952,972,1236,1803,1880,2621,2736,2737,3071,3113,3115,3118,3119,3120,3122,3123,3125,3126,3127,3134,3479,3574,3575,3600,3606,3684,3956,4208,4352,5321,5788,6352,6363,6504,6666,7412,7535,10333,26191,29851,30009,55423,64926,85480,90865,114548,120892,100423062	AIF1,ANXA1,AXL,BST1,BTK,CAV1,CD1D,CD2,CD27,CD28,CD38,CD74,CCR7,DPP4,GPR183,GAS6,GLI2,GLI3,NCKAP1L,HLA-DPA1,HLA-DPB1,HLA-DQA2,HLA-DQB1,HLA-DQB2,HLA-DRA,HLA-DRB1,HLA-DRB3,HLA-DRB4,HLA-DRB5,HLA-F,IGF1,IL7,IL7R,IL15,IL18,ITGAM,LGALS1,MEF2C,MPL,PLA2G4A,PTPRC,CCL5,CCL19,SLAMF1,SOX12,VCAM1,ZAP70,TLR6,PTPN22,ICOS,TBX21,SIRPG,RASAL3,TSLP,IL33,NLRP3,LRRK2,IGLL5
2_Member	GO Biological Processes	GO:0070661	leukocyte proliferation	-15.0471	-12.3854	50/320	199,301,384,640,652,683,695,912,930,931,940,952,972,1191,1436,1794,1880,2213,2322,2950,3071,3113,3115,3123,3479,3574,3575,3600,3606,3815,3958,4208,4254,4332,4352,5532,5788,6352,6363,6376,6504,7412,7535,7940,11035,23228,26191,56253,64926,90865	AIF1,ANXA1,ARG2,BLK,BMP4,BST1,BTK,CD1D,CD19,MS4A1,CD28,CD38,CD74,CLU,CSF1R,DOCK2,GPR183,FCGR2B,FLT3,GSTP1,NCKAP1L,HLA-DPA1,HLA-DPB1,HLA-DRB1,IGF1,IL7,IL7R,IL15,IL18,KIT,LGALS3,MEF2C,KITLG,MNDA,MPL,PPP3CB,PTPRC,CCL5,CCL19,CX3CL1,SLAMF1,VCAM1,ZAP70,LST1,RIPK3,PLCL2,PTPN22,CRTAM,RASAL3,IL33
2_Member	GO Biological Processes	GO:0050870	positive regulation of T cell activation	-14.6943	-12.0905	40/216	199,301,857,912,939,940,972,1236,1803,2736,2737,3071,3113,3115,3118,3119,3120,3122,3123,3125,3126,3127,3479,3574,3575,3600,3606,3956,5788,6352,6363,6504,6666,7412,7535,26191,29851,55423,64926,114548	AIF1,ANXA1,CAV1,CD1D,CD27,CD28,CD74,CCR7,DPP4,GLI2,GLI3,NCKAP1L,HLA-DPA1,HLA-DPB1,HLA-DQA2,HLA-DQB1,HLA-DQB2,HLA-DRA,HLA-DRB1,HLA-DRB3,HLA-DRB4,HLA-DRB5,IGF1,IL7,IL7R,IL15,IL18,LGALS1,PTPRC,CCL5,CCL19,SLAMF1,SOX12,VCAM1,ZAP70,PTPN22,ICOS,SIRPG,RASAL3,NLRP3
2_Member	GO Biological Processes	GO:0051251	positive regulation of lymphocyte activation	-13.4813	-11.0215	51/362	199,301,558,683,695,857,912,939,940,952,972,1236,1803,1880,2621,2736,2737,3071,3113,3115,3118,3119,3120,3122,3123,3125,3126,3127,3134,3479,3574,3575,3600,3606,3956,4208,4352,5788,6352,6363,6504,6666,7412,7535,26191,29851,30009,55423,64926,114548,100423062	AIF1,ANXA1,AXL,BST1,BTK,CAV1,CD1D,CD27,CD28,CD38,CD74,CCR7,DPP4,GPR183,GAS6,GLI2,GLI3,NCKAP1L,HLA-DPA1,HLA-DPB1,HLA-DQA2,HLA-DQB1,HLA-DQB2,HLA-DRA,HLA-DRB1,HLA-DRB3,HLA-DRB4,HLA-DRB5,HLA-F,IGF1,IL7,IL7R,IL15,IL18,LGALS1,MEF2C,MPL,PTPRC,CCL5,CCL19,SLAMF1,SOX12,VCAM1,ZAP70,PTPN22,ICOS,TBX21,SIRPG,RASAL3,NLRP3,IGLL5
2_Member	GO Biological Processes	GO:0070663	regulation of leukocyte proliferation	-12.7444	-10.3219	40/246	199,301,384,640,652,683,695,912,940,952,972,1436,1880,2213,2950,3071,3113,3115,3123,3479,3574,3600,3606,3958,4208,4254,4332,4352,5788,6352,6363,6504,7412,7535,7940,11035,26191,56253,64926,90865	AIF1,ANXA1,ARG2,BLK,BMP4,BST1,BTK,CD1D,CD28,CD38,CD74,CSF1R,GPR183,FCGR2B,GSTP1,NCKAP1L,HLA-DPA1,HLA-DPB1,HLA-DRB1,IGF1,IL7,IL15,IL18,LGALS3,MEF2C,KITLG,MNDA,MPL,PTPRC,CCL5,CCL19,SLAMF1,VCAM1,ZAP70,LST1,RIPK3,PTPN22,CRTAM,RASAL3,IL33
2_Member	GO Biological Processes	GO:0046651	lymphocyte proliferation	-12.2302	-9.86509	43/290	199,301,384,640,652,683,695,912,930,931,940,952,972,1794,1880,2213,2322,3071,3113,3115,3123,3479,3574,3575,3600,3606,3958,4208,4332,4352,5532,5788,6352,6363,6504,7412,7535,7940,11035,23228,26191,56253,64926	AIF1,ANXA1,ARG2,BLK,BMP4,BST1,BTK,CD1D,CD19,MS4A1,CD28,CD38,CD74,DOCK2,GPR183,FCGR2B,FLT3,NCKAP1L,HLA-DPA1,HLA-DPB1,HLA-DRB1,IGF1,IL7,IL7R,IL15,IL18,LGALS3,MEF2C,MNDA,MPL,PPP3CB,PTPRC,CCL5,CCL19,SLAMF1,VCAM1,ZAP70,LST1,RIPK3,PLCL2,PTPN22,CRTAM,RASAL3
2_Member	GO Biological Processes	GO:0030217	T cell differentiation	-12.1672	-9.80652	40/256	301,652,912,914,915,917,925,939,940,972,1236,1794,1880,2736,2737,2841,3071,3122,3123,3574,3575,3600,3606,3702,3815,3821,5532,5788,5796,6363,6666,7535,8324,10875,11035,26191,30009,56253,114548,257101	ANXA1,BMP4,CD1D,CD2,CD3D,CD3G,CD8A,CD27,CD28,CD74,CCR7,DOCK2,GPR183,GLI2,GLI3,GPR18,NCKAP1L,HLA-DRA,HLA-DRB1,IL7,IL7R,IL15,IL18,ITK,KIT,KLRC1,PPP3CB,PTPRC,PTPRK,CCL19,SOX12,ZAP70,FZD7,FGL2,RIPK3,PTPN22,TBX21,CRTAM,NLRP3,ZNF683
2_Member	GO Biological Processes	GO:0032943	mononuclear cell proliferation	-12.0753	-9.72335	43/293	199,301,384,640,652,683,695,912,930,931,940,952,972,1794,1880,2213,2322,3071,3113,3115,3123,3479,3574,3575,3600,3606,3958,4208,4332,4352,5532,5788,6352,6363,6504,7412,7535,7940,11035,23228,26191,56253,64926	AIF1,ANXA1,ARG2,BLK,BMP4,BST1,BTK,CD1D,CD19,MS4A1,CD28,CD38,CD74,DOCK2,GPR183,FCGR2B,FLT3,NCKAP1L,HLA-DPA1,HLA-DPB1,HLA-DRB1,IGF1,IL7,IL7R,IL15,IL18,LGALS3,MEF2C,MNDA,MPL,PPP3CB,PTPRC,CCL5,CCL19,SLAMF1,VCAM1,ZAP70,LST1,RIPK3,PLCL2,PTPN22,CRTAM,RASAL3
2_Member	GO Biological Processes	GO:1903706	regulation of hemopoiesis	-11.3941	-9.09908	48/370	301,558,652,695,914,939,940,972,2124,2200,2213,2621,2736,2737,3059,3071,3106,3122,3123,3398,3574,3575,3600,3606,3956,3958,4208,4211,4212,4254,4352,5295,5764,5788,6363,6422,6666,7098,7535,10826,10875,29909,30009,56253,56833,114548,257101,338382	ANXA1,AXL,BMP4,BTK,CD2,CD27,CD28,CD74,EVI2B,FBN1,FCGR2B,GAS6,GLI2,GLI3,HCLS1,NCKAP1L,HLA-B,HLA-DRA,HLA-DRB1,ID2,IL7,IL7R,IL15,IL18,LGALS1,LGALS3,MEF2C,MEIS1,MEIS2,KITLG,MPL,PIK3R1,PTN,PTPRC,CCL19,SFRP1,SOX12,TLR3,ZAP70,FAXDC2,FGL2,GPR171,TBX21,CRTAM,SLAMF8,NLRP3,ZNF683,RAB7B
2_Member	GO Biological Processes	GO:0050670	regulation of lymphocyte proliferation	-11.2682	-8.99912	36/226	199,301,384,640,652,683,695,912,940,952,972,1880,2213,3071,3113,3115,3123,3479,3574,3600,3606,3958,4208,4332,4352,5788,6352,6363,6504,7412,7535,7940,11035,26191,56253,64926	AIF1,ANXA1,ARG2,BLK,BMP4,BST1,BTK,CD1D,CD28,CD38,CD74,GPR183,FCGR2B,NCKAP1L,HLA-DPA1,HLA-DPB1,HLA-DRB1,IGF1,IL7,IL15,IL18,LGALS3,MEF2C,MNDA,MPL,PTPRC,CCL5,CCL19,SLAMF1,VCAM1,ZAP70,LST1,RIPK3,PTPN22,CRTAM,RASAL3
2_Member	GO Biological Processes	GO:0032944	regulation of mononuclear cell proliferation	-11.1536	-8.90554	36/228	199,301,384,640,652,683,695,912,940,952,972,1880,2213,3071,3113,3115,3123,3479,3574,3600,3606,3958,4208,4332,4352,5788,6352,6363,6504,7412,7535,7940,11035,26191,56253,64926	AIF1,ANXA1,ARG2,BLK,BMP4,BST1,BTK,CD1D,CD28,CD38,CD74,GPR183,FCGR2B,NCKAP1L,HLA-DPA1,HLA-DPB1,HLA-DRB1,IGF1,IL7,IL15,IL18,LGALS3,MEF2C,MNDA,MPL,PTPRC,CCL5,CCL19,SLAMF1,VCAM1,ZAP70,LST1,RIPK3,PTPN22,CRTAM,RASAL3
2_Member	GO Biological Processes	GO:1902105	regulation of leukocyte differentiation	-10.8559	-8.63752	40/281	301,558,652,695,914,939,940,972,2124,2200,2213,2621,2736,2737,3059,3071,3106,3122,3123,3398,3574,3575,3600,3606,3956,3958,4254,5295,5788,6363,6422,6666,7098,7535,10875,30009,56253,56833,114548,257101	ANXA1,AXL,BMP4,BTK,CD2,CD27,CD28,CD74,EVI2B,FBN1,FCGR2B,GAS6,GLI2,GLI3,HCLS1,NCKAP1L,HLA-B,HLA-DRA,HLA-DRB1,ID2,IL7,IL7R,IL15,IL18,LGALS1,LGALS3,KITLG,PIK3R1,PTPRC,CCL19,SFRP1,SOX12,TLR3,ZAP70,FGL2,TBX21,CRTAM,SLAMF8,NLRP3,ZNF683
2_Member	GO Biological Processes	GO:0045619	regulation of lymphocyte differentiation	-10.3781	-8.21931	30/174	301,558,652,695,914,939,940,972,2621,2736,2737,3071,3122,3123,3398,3574,3575,3600,3606,5788,6363,6422,6666,7535,10875,30009,56253,56833,114548,257101	ANXA1,AXL,BMP4,BTK,CD2,CD27,CD28,CD74,GAS6,GLI2,GLI3,NCKAP1L,HLA-DRA,HLA-DRB1,ID2,IL7,IL7R,IL15,IL18,PTPRC,CCL19,SFRP1,SOX12,ZAP70,FGL2,TBX21,CRTAM,SLAMF8,NLRP3,ZNF683
2_Member	GO Biological Processes	GO:0070665	positive regulation of leukocyte proliferation	-9.8473	-7.75066	27/150	199,301,683,912,940,952,972,1436,1880,3071,3113,3115,3479,3574,3600,3606,4208,4254,4352,5788,6352,6363,6504,7412,7535,26191,64926	AIF1,ANXA1,BST1,CD1D,CD28,CD38,CD74,CSF1R,GPR183,NCKAP1L,HLA-DPA1,HLA-DPB1,IGF1,IL7,IL15,IL18,MEF2C,KITLG,MPL,PTPRC,CCL5,CCL19,SLAMF1,VCAM1,ZAP70,PTPN22,RASAL3
2_Member	GO Biological Processes	GO:0050671	positive regulation of lymphocyte proliferation	-9.29906	-7.246	25/137	199,301,683,912,940,952,972,1880,3071,3113,3115,3479,3574,3600,3606,4208,4352,5788,6352,6363,6504,7412,7535,26191,64926	AIF1,ANXA1,BST1,CD1D,CD28,CD38,CD74,GPR183,NCKAP1L,HLA-DPA1,HLA-DPB1,IGF1,IL7,IL15,IL18,MEF2C,MPL,PTPRC,CCL5,CCL19,SLAMF1,VCAM1,ZAP70,PTPN22,RASAL3
2_Member	GO Biological Processes	GO:0032946	positive regulation of mononuclear cell proliferation	-9.22966	-7.18738	25/138	199,301,683,912,940,952,972,1880,3071,3113,3115,3479,3574,3600,3606,4208,4352,5788,6352,6363,6504,7412,7535,26191,64926	AIF1,ANXA1,BST1,CD1D,CD28,CD38,CD74,GPR183,NCKAP1L,HLA-DPA1,HLA-DPB1,IGF1,IL7,IL15,IL18,MEF2C,MPL,PTPRC,CCL5,CCL19,SLAMF1,VCAM1,ZAP70,PTPN22,RASAL3
2_Member	GO Biological Processes	GO:1902107	positive regulation of leukocyte differentiation	-8.5763	-6.61533	26/159	301,558,695,939,972,2124,2621,2736,2737,3059,3071,3122,3123,3398,3574,3575,3600,3606,3956,3958,4254,5788,6363,6666,7535,114548	ANXA1,AXL,BTK,CD27,CD74,EVI2B,GAS6,GLI2,GLI3,HCLS1,NCKAP1L,HLA-DRA,HLA-DRB1,ID2,IL7,IL7R,IL15,IL18,LGALS1,LGALS3,KITLG,PTPRC,CCL19,SOX12,ZAP70,NLRP3
2_Member	GO Biological Processes	GO:1903708	positive regulation of hemopoiesis	-8.5763	-6.61533	26/159	301,558,695,939,972,2124,2621,2736,2737,3059,3071,3122,3123,3398,3574,3575,3600,3606,3956,3958,4254,5788,6363,6666,7535,114548	ANXA1,AXL,BTK,CD27,CD74,EVI2B,GAS6,GLI2,GLI3,HCLS1,NCKAP1L,HLA-DRA,HLA-DRB1,ID2,IL7,IL7R,IL15,IL18,LGALS1,LGALS3,KITLG,PTPRC,CCL19,SOX12,ZAP70,NLRP3
2_Member	GO Biological Processes	GO:0045580	regulation of T cell differentiation	-8.01506	-6.0929	24/146	301,652,914,939,940,972,2736,2737,3071,3122,3123,3574,3575,3600,3606,5788,6363,6666,7535,10875,30009,56253,114548,257101	ANXA1,BMP4,CD2,CD27,CD28,CD74,GLI2,GLI3,NCKAP1L,HLA-DRA,HLA-DRB1,IL7,IL7R,IL15,IL18,PTPRC,CCL19,SOX12,ZAP70,FGL2,TBX21,CRTAM,NLRP3,ZNF683
2_Member	GO Biological Processes	GO:0045621	positive regulation of lymphocyte differentiation	-7.97908	-6.06447	20/104	301,558,695,939,972,2621,2736,2737,3071,3122,3123,3574,3575,3600,3606,5788,6363,6666,7535,114548	ANXA1,AXL,BTK,CD27,CD74,GAS6,GLI2,GLI3,NCKAP1L,HLA-DRA,HLA-DRB1,IL7,IL7R,IL15,IL18,PTPRC,CCL19,SOX12,ZAP70,NLRP3
2_Member	GO Biological Processes	GO:0042102	positive regulation of T cell proliferation	-6.72009	-4.93166	18/101	199,301,912,940,3071,3113,3115,3479,3600,3606,5788,6352,6363,6504,7412,7535,26191,64926	AIF1,ANXA1,CD1D,CD28,NCKAP1L,HLA-DPA1,HLA-DPB1,IGF1,IL15,IL18,PTPRC,CCL5,CCL19,SLAMF1,VCAM1,ZAP70,PTPN22,RASAL3
2_Member	GO Biological Processes	GO:0042129	regulation of T cell proliferation	-6.61986	-4.84198	24/172	199,301,384,652,912,940,3071,3113,3115,3123,3479,3600,3606,3958,5788,6352,6363,6504,7412,7535,11035,26191,56253,64926	AIF1,ANXA1,ARG2,BMP4,CD1D,CD28,NCKAP1L,HLA-DPA1,HLA-DPB1,HLA-DRB1,IGF1,IL15,IL18,LGALS3,PTPRC,CCL5,CCL19,SLAMF1,VCAM1,ZAP70,RIPK3,PTPN22,CRTAM,RASAL3
2_Member	GO Biological Processes	GO:0042098	T cell proliferation	-6.4542	-4.69335	26/201	199,301,384,652,912,940,1794,3071,3113,3115,3123,3479,3600,3606,3958,5532,5788,6352,6363,6504,7412,7535,11035,26191,56253,64926	AIF1,ANXA1,ARG2,BMP4,CD1D,CD28,DOCK2,NCKAP1L,HLA-DPA1,HLA-DPB1,HLA-DRB1,IGF1,IL15,IL18,LGALS3,PPP3CB,PTPRC,CCL5,CCL19,SLAMF1,VCAM1,ZAP70,RIPK3,PTPN22,CRTAM,RASAL3
2_Member	GO Biological Processes	GO:0045582	positive regulation of T cell differentiation	-5.96282	-4.26315	16/91	301,939,972,2736,2737,3071,3122,3123,3574,3575,3606,5788,6363,6666,7535,114548	ANXA1,CD27,CD74,GLI2,GLI3,NCKAP1L,HLA-DRA,HLA-DRB1,IL7,IL7R,IL18,PTPRC,CCL19,SOX12,ZAP70,NLRP3
3_Summary	GO Biological Processes	GO:0030029	actin filament-based process	-22.7044	-19.1976	110/796	60,70,199,283,301,390,397,477,488,683,781,800,857,1073,1236,1264,1266,1436,1465,1490,1794,1809,1902,1946,2044,2252,2316,2318,2697,2824,2934,3059,3071,3611,3764,3815,4629,4637,4653,4908,4916,5063,5066,5239,5295,5341,5350,5358,5592,5881,6327,6376,6387,6422,6525,6548,6840,7010,7043,7111,7169,8477,8572,9172,9260,9353,9535,9647,9722,9749,9754,10178,10580,10602,10603,10630,10979,11034,11155,11170,11235…	ACTB,ACTC1,AIF1,ANG,ANXA1,RND3,ARHGDIB,ATP1A2,ATP2A2,BST1,CACNA2D1,CALD1,CAV1,CFL2,CCR7,CNN1,CNN3,CSF1R,CSRP1,CCN2,DOCK2,DPYSL3,LPAR1,EFNA5,EPHA5,FGF7,FLNA,FLNC,GJA1,GPM6B,GSN,HCLS1,NCKAP1L,ILK,KCNJ8,KIT,MYH11,MYL6,MYOC,NTF3,NTRK3,PAK3,PAM,PGM5,PIK3R1,PLEK,PLN,PLS3,PRKG1,RAC3,SCN2B,CX3CL1,CXCL12,SFRP1,SMTN,SLC9A1,SVIL,TEK,TGFB3,TMOD1,TPM2,GPR65,PDLIM4,MYOM2,PDLIM7,SLIT2,GMFG,PPM1F,NOS1AP,PHACTR2,…
3_Member	GO Biological Processes	GO:0030029	actin filament-based process	-22.7044	-19.1976	110/796	60,70,199,283,301,390,397,477,488,683,781,800,857,1073,1236,1264,1266,1436,1465,1490,1794,1809,1902,1946,2044,2252,2316,2318,2697,2824,2934,3059,3071,3611,3764,3815,4629,4637,4653,4908,4916,5063,5066,5239,5295,5341,5350,5358,5592,5881,6327,6376,6387,6422,6525,6548,6840,7010,7043,7111,7169,8477,8572,9172,9260,9353,9535,9647,9722,9749,9754,10178,10580,10602,10603,10630,10979,11034,11155,11170,11235…	ACTB,ACTC1,AIF1,ANG,ANXA1,RND3,ARHGDIB,ATP1A2,ATP2A2,BST1,CACNA2D1,CALD1,CAV1,CFL2,CCR7,CNN1,CNN3,CSF1R,CSRP1,CCN2,DOCK2,DPYSL3,LPAR1,EFNA5,EPHA5,FGF7,FLNA,FLNC,GJA1,GPM6B,GSN,HCLS1,NCKAP1L,ILK,KCNJ8,KIT,MYH11,MYL6,MYOC,NTF3,NTRK3,PAK3,PAM,PGM5,PIK3R1,PLEK,PLN,PLS3,PRKG1,RAC3,SCN2B,CX3CL1,CXCL12,SFRP1,SMTN,SLC9A1,SVIL,TEK,TGFB3,TMOD1,TPM2,GPR65,PDLIM4,MYOM2,PDLIM7,SLIT2,GMFG,PPM1F,NOS1AP,PHACTR2,…
3_Member	GO Biological Processes	GO:0030036	actin cytoskeleton organization	-20.7809	-17.3833	99/709	60,70,199,283,301,390,397,683,800,1073,1236,1264,1266,1436,1465,1490,1794,1809,1902,1946,2044,2252,2316,2318,2824,2934,3059,3071,3611,3815,4629,4653,4908,4916,5063,5066,5239,5295,5341,5358,5592,5881,6376,6387,6422,6525,6548,6840,7010,7043,7111,7169,8477,8572,9172,9260,9353,9535,9647,9722,9749,9754,10178,10580,10602,10603,10979,11034,11155,11170,11235,22899,23022,23043,23136,23189,23500,23607,2580…	ACTB,ACTC1,AIF1,ANG,ANXA1,RND3,ARHGDIB,BST1,CALD1,CFL2,CCR7,CNN1,CNN3,CSF1R,CSRP1,CCN2,DOCK2,DPYSL3,LPAR1,EFNA5,EPHA5,FGF7,FLNA,FLNC,GPM6B,GSN,HCLS1,NCKAP1L,ILK,KIT,MYH11,MYOC,NTF3,NTRK3,PAK3,PAM,PGM5,PIK3R1,PLEK,PLS3,PRKG1,RAC3,CX3CL1,CXCL12,SFRP1,SMTN,SLC9A1,SVIL,TEK,TGFB3,TMOD1,TPM2,GPR65,PDLIM4,MYOM2,PDLIM7,SLIT2,GMFG,PPM1F,NOS1AP,PHACTR2,STARD8,TENM1,SORBS1,CDC42EP3,SH2B2,FERMT2,DSTN,LDB3,FA…
3_Member	GO Biological Processes	GO:0032970	regulation of actin filament-based process	-13.8318	-11.206	59/396	390,397,477,488,683,857,1073,1236,1436,1490,1902,1946,2044,2316,2824,2934,3059,3071,3611,4653,4908,4916,5063,5066,5295,5341,5350,5881,6376,6387,6422,6548,6840,7010,7043,7111,8477,9353,9535,9647,10178,10602,10630,10979,11034,11170,22899,23189,23607,25802,55704,55971,80206,83700,84952,85458,130271,163782,171024	RND3,ARHGDIB,ATP1A2,ATP2A2,BST1,CAV1,CFL2,CCR7,CSF1R,CCN2,LPAR1,EFNA5,EPHA5,FLNA,GPM6B,GSN,HCLS1,NCKAP1L,ILK,MYOC,NTF3,NTRK3,PAK3,PAM,PIK3R1,PLEK,PLN,RAC3,CX3CL1,CXCL12,SFRP1,SLC9A1,SVIL,TEK,TGFB3,TMOD1,GPR65,SLIT2,GMFG,PPM1F,TENM1,CDC42EP3,PDPN,FERMT2,DSTN,FAM107A,ARHGEF15,KANK1,CD2AP,LMOD1,CCDC88A,BAIAP2L1,FHOD3,JAM3,CGNL1,DIXDC1,PLEKHH2,KANK4,SYNPO2
3_Member	GO Biological Processes	GO:0032956	regulation of actin cytoskeleton organization	-12.9856	-10.4598	54/357	390,397,683,1073,1236,1436,1490,1902,1946,2044,2316,2824,2934,3059,3071,3611,4653,4908,4916,5063,5066,5295,5341,5881,6376,6387,6422,6548,6840,7010,7043,7111,8477,9353,9535,9647,10178,10602,10979,11034,11170,22899,23189,23607,25802,55704,55971,80206,83700,84952,85458,130271,163782,171024	RND3,ARHGDIB,BST1,CFL2,CCR7,CSF1R,CCN2,LPAR1,EFNA5,EPHA5,FLNA,GPM6B,GSN,HCLS1,NCKAP1L,ILK,MYOC,NTF3,NTRK3,PAK3,PAM,PIK3R1,PLEK,RAC3,CX3CL1,CXCL12,SFRP1,SLC9A1,SVIL,TEK,TGFB3,TMOD1,GPR65,SLIT2,GMFG,PPM1F,TENM1,CDC42EP3,FERMT2,DSTN,FAM107A,ARHGEF15,KANK1,CD2AP,LMOD1,CCDC88A,BAIAP2L1,FHOD3,JAM3,CGNL1,DIXDC1,PLEKHH2,KANK4,SYNPO2
3_Member	GO Biological Processes	GO:0097435	supramolecular fiber organization	-10.6055	-8.32708	80/746	70,165,199,283,390,800,1073,1191,1236,1305,1410,1465,1490,1674,1805,1809,1902,2296,2316,2331,2934,3059,3071,3611,4016,4060,4239,4320,4629,4653,4921,5063,5239,5295,5341,5358,5881,6314,6376,6387,6422,6423,6548,6622,6840,7043,7111,7169,7373,7431,8477,9172,9353,9535,9647,10178,10580,10602,10979,11034,11035,11155,11170,11235,22899,23127,23189,23607,25802,29993,55704,55930,55971,79745,80206,84952,89927…	ACTC1,AEBP1,AIF1,ANG,RND3,CALD1,CFL2,CLU,CCR7,COL13A1,CRYAB,CSRP1,CCN2,DES,DPT,DPYSL3,LPAR1,FOXC1,FLNA,FMOD,GSN,HCLS1,NCKAP1L,ILK,LOXL1,LUM,MFAP4,MMP11,MYH11,MYOC,DDR2,PAK3,PGM5,PIK3R1,PLEK,PLS3,RAC3,ATXN7,CX3CL1,CXCL12,SFRP1,SFRP2,SLC9A1,SNCA,SVIL,TGFB3,TMOD1,TPM2,COL14A1,VIM,GPR65,MYOM2,SLIT2,GMFG,PPM1F,TENM1,SORBS1,CDC42EP3,FERMT2,DSTN,RIPK3,LDB3,FAM107A,PDCD10,ARHGEF15,COLGALT2,KANK1,CD2AP,LM…
3_Member	GO Biological Processes	GO:0051493	regulation of cytoskeleton organization	-9.12215	-7.0444	60/526	390,397,683,827,1073,1236,1436,1490,1902,1946,2044,2316,2824,2934,3059,3071,3611,4653,4908,4916,5063,5066,5295,5341,5881,6314,6376,6387,6422,6548,6622,6840,7010,7043,7111,8477,9353,9535,9647,10178,10602,10979,11034,11170,22899,23189,23607,25802,25932,55704,55971,80206,83700,84952,85458,89927,91624,130271,163782,171024	RND3,ARHGDIB,BST1,CAPN6,CFL2,CCR7,CSF1R,CCN2,LPAR1,EFNA5,EPHA5,FLNA,GPM6B,GSN,HCLS1,NCKAP1L,ILK,MYOC,NTF3,NTRK3,PAK3,PAM,PIK3R1,PLEK,RAC3,ATXN7,CX3CL1,CXCL12,SFRP1,SLC9A1,SNCA,SVIL,TEK,TGFB3,TMOD1,GPR65,SLIT2,GMFG,PPM1F,TENM1,CDC42EP3,FERMT2,DSTN,FAM107A,ARHGEF15,KANK1,CD2AP,LMOD1,CLIC4,CCDC88A,BAIAP2L1,FHOD3,JAM3,CGNL1,DIXDC1,BMERB1,NEXN,PLEKHH2,KANK4,SYNPO2
3_Member	GO Biological Processes	GO:0007015	actin filament organization	-8.48335	-6.49505	52/441	70,199,283,390,800,1073,1236,1490,1809,1902,2316,2934,3059,3071,4653,5063,5295,5341,5358,5881,6376,6387,6422,6548,6840,7043,7111,7169,8477,9353,9535,9647,10178,10580,10602,10979,11034,11170,11235,22899,23189,23607,25802,29993,55704,55930,55971,80206,84952,130271,163782,171024	ACTC1,AIF1,ANG,RND3,CALD1,CFL2,CCR7,CCN2,DPYSL3,LPAR1,FLNA,GSN,HCLS1,NCKAP1L,MYOC,PAK3,PIK3R1,PLEK,PLS3,RAC3,CX3CL1,CXCL12,SFRP1,SLC9A1,SVIL,TGFB3,TMOD1,TPM2,GPR65,SLIT2,GMFG,PPM1F,TENM1,SORBS1,CDC42EP3,FERMT2,DSTN,FAM107A,PDCD10,ARHGEF15,KANK1,CD2AP,LMOD1,PACSIN1,CCDC88A,MYO5C,BAIAP2L1,FHOD3,CGNL1,PLEKHH2,KANK4,SYNPO2
3_Member	GO Biological Processes	GO:0110053	regulation of actin filament organization	-7.66043	-5.73988	37/276	1073,1236,1490,1902,2316,2934,3059,3071,4653,5063,5295,5341,6376,6387,6422,6548,6840,7043,7111,8477,9353,9535,9647,10178,10602,10979,11034,22899,23189,25802,55704,55971,80206,84952,130271,163782,171024	CFL2,CCR7,CCN2,LPAR1,FLNA,GSN,HCLS1,NCKAP1L,MYOC,PAK3,PIK3R1,PLEK,CX3CL1,CXCL12,SFRP1,SLC9A1,SVIL,TGFB3,TMOD1,GPR65,SLIT2,GMFG,PPM1F,TENM1,CDC42EP3,FERMT2,DSTN,ARHGEF15,KANK1,LMOD1,CCDC88A,BAIAP2L1,FHOD3,CGNL1,PLEKHH2,KANK4,SYNPO2
3_Member	GO Biological Processes	GO:0031032	actomyosin structure organization	-7.0265	-5.18379	29/197	70,1073,1264,1266,1465,1490,1902,4629,4653,5239,5295,6422,6548,7043,7111,8477,9172,9647,10580,10979,11155,11235,22899,23136,25802,55704,80206,84952,122786	ACTC1,CFL2,CNN1,CNN3,CSRP1,CCN2,LPAR1,MYH11,MYOC,PGM5,PIK3R1,SFRP1,SLC9A1,TGFB3,TMOD1,GPR65,MYOM2,PPM1F,SORBS1,FERMT2,LDB3,PDCD10,ARHGEF15,EPB41L3,LMOD1,CCDC88A,FHOD3,CGNL1,FRMD6
3_Member	GO Biological Processes	GO:0051017	actin filament bundle assembly	-6.70546	-4.89886	25/159	199,800,1490,1809,1902,2316,4653,5295,5341,5358,6376,6422,6548,7043,8477,9647,10580,10979,11170,11235,22899,55704,55971,84952,171024	AIF1,CALD1,CCN2,DPYSL3,LPAR1,FLNA,MYOC,PIK3R1,PLEK,PLS3,CX3CL1,SFRP1,SLC9A1,TGFB3,GPR65,PPM1F,SORBS1,FERMT2,FAM107A,PDCD10,ARHGEF15,CCDC88A,BAIAP2L1,CGNL1,SYNPO2
3_Member	GO Biological Processes	GO:1902903	regulation of supramolecular fiber organization	-6.62683	-4.82514	43/380	165,1073,1191,1236,1410,1490,1902,2316,2934,3059,3071,4653,5063,5295,5341,6314,6376,6387,6422,6548,6622,6840,7043,7111,8477,9353,9535,9647,10178,10602,10979,11034,22899,23189,25802,55704,55971,80206,84952,89927,130271,163782,171024	AEBP1,CFL2,CLU,CCR7,CRYAB,CCN2,LPAR1,FLNA,GSN,HCLS1,NCKAP1L,MYOC,PAK3,PIK3R1,PLEK,ATXN7,CX3CL1,CXCL12,SFRP1,SLC9A1,SNCA,SVIL,TGFB3,TMOD1,GPR65,SLIT2,GMFG,PPM1F,TENM1,CDC42EP3,FERMT2,DSTN,ARHGEF15,KANK1,LMOD1,CCDC88A,BAIAP2L1,FHOD3,CGNL1,BMERB1,PLEKHH2,KANK4,SYNPO2
3_Member	GO Biological Processes	GO:0061572	actin filament bundle organization	-6.49395	-4.70314	25/163	199,800,1490,1809,1902,2316,4653,5295,5341,5358,6376,6422,6548,7043,8477,9647,10580,10979,11170,11235,22899,55704,55971,84952,171024	AIF1,CALD1,CCN2,DPYSL3,LPAR1,FLNA,MYOC,PIK3R1,PLEK,PLS3,CX3CL1,SFRP1,SLC9A1,TGFB3,GPR65,PPM1F,SORBS1,FERMT2,FAM107A,PDCD10,ARHGEF15,CCDC88A,BAIAP2L1,CGNL1,SYNPO2
3_Member	GO Biological Processes	GO:0032233	positive regulation of actin filament bundle assembly	-5.92559	-4.20309	14/62	1490,1902,2316,4653,5341,6376,6422,7043,8477,9647,10979,22899,55704,171024	CCN2,LPAR1,FLNA,MYOC,PLEK,CX3CL1,SFRP1,TGFB3,GPR65,PPM1F,FERMT2,ARHGEF15,CCDC88A,SYNPO2
3_Member	GO Biological Processes	GO:0051495	positive regulation of cytoskeleton organization	-5.35868	-3.71434	28/224	1073,1236,1490,1902,2316,2934,3059,3071,4653,4908,4916,5341,6376,6422,7010,7043,8477,9535,9647,10178,10602,10979,11034,22899,25802,55704,55971,171024	CFL2,CCR7,CCN2,LPAR1,FLNA,GSN,HCLS1,NCKAP1L,MYOC,NTF3,NTRK3,PLEK,CX3CL1,SFRP1,TEK,TGFB3,GPR65,GMFG,PPM1F,TENM1,CDC42EP3,FERMT2,DSTN,ARHGEF15,LMOD1,CCDC88A,BAIAP2L1,SYNPO2
3_Member	GO Biological Processes	GO:0032231	regulation of actin filament bundle assembly	-4.99691	-3.41116	17/104	1490,1902,2316,4653,5295,5341,6376,6422,6548,7043,8477,9647,10979,22899,55704,84952,171024	CCN2,LPAR1,FLNA,MYOC,PIK3R1,PLEK,CX3CL1,SFRP1,SLC9A1,TGFB3,GPR65,PPM1F,FERMT2,ARHGEF15,CCDC88A,CGNL1,SYNPO2
3_Member	GO Biological Processes	GO:1902905	positive regulation of supramolecular fiber organization	-4.59781	-3.07067	25/207	1073,1191,1236,1490,1902,2316,2934,3071,4653,5341,6376,6422,7043,8477,9535,9647,10178,10602,10979,11034,22899,25802,55704,55971,171024	CFL2,CLU,CCR7,CCN2,LPAR1,FLNA,GSN,NCKAP1L,MYOC,PLEK,CX3CL1,SFRP1,TGFB3,GPR65,GMFG,PPM1F,TENM1,CDC42EP3,FERMT2,DSTN,ARHGEF15,LMOD1,CCDC88A,BAIAP2L1,SYNPO2
3_Member	GO Biological Processes	GO:0051496	positive regulation of stress fiber assembly	-3.77422	-2.36531	10/52	1490,1902,4653,6422,7043,8477,9647,10979,22899,55704	CCN2,LPAR1,MYOC,SFRP1,TGFB3,GPR65,PPM1F,FERMT2,ARHGEF15,CCDC88A
3_Member	GO Biological Processes	GO:0030038	contractile actin filament bundle assembly	-3.65612	-2.26799	15/108	1490,1902,4653,5295,6422,6548,7043,8477,9647,10580,10979,11235,22899,55704,84952	CCN2,LPAR1,MYOC,PIK3R1,SFRP1,SLC9A1,TGFB3,GPR65,PPM1F,SORBS1,FERMT2,PDCD10,ARHGEF15,CCDC88A,CGNL1
3_Member	GO Biological Processes	GO:0043149	stress fiber assembly	-3.65612	-2.26799	15/108	1490,1902,4653,5295,6422,6548,7043,8477,9647,10580,10979,11235,22899,55704,84952	CCN2,LPAR1,MYOC,PIK3R1,SFRP1,SLC9A1,TGFB3,GPR65,PPM1F,SORBS1,FERMT2,PDCD10,ARHGEF15,CCDC88A,CGNL1
3_Member	GO Biological Processes	GO:0051492	regulation of stress fiber assembly	-3.36627	-2.02635	13/91	1490,1902,4653,5295,6422,6548,7043,8477,9647,10979,22899,55704,84952	CCN2,LPAR1,MYOC,PIK3R1,SFRP1,SLC9A1,TGFB3,GPR65,PPM1F,FERMT2,ARHGEF15,CCDC88A,CGNL1
3_Member	GO Biological Processes	GO:0110020	regulation of actomyosin structure organization	-2.97108	-1.71468	13/100	1490,1902,4653,5295,6422,6548,7043,8477,9647,10979,22899,55704,84952	CCN2,LPAR1,MYOC,PIK3R1,SFRP1,SLC9A1,TGFB3,GPR65,PPM1F,FERMT2,ARHGEF15,CCDC88A,CGNL1
4_Summary	GO Biological Processes	GO:0006935	chemotaxis	-22.5678	-19.119	86/607	199,214,240,301,652,683,972,1123,1234,1236,1436,1524,1794,1803,1808,1843,1880,1902,1946,2044,2247,2252,2297,2350,2621,2736,2737,2841,2950,3071,3082,3627,3670,3690,3815,3908,3958,4046,4283,4908,4916,5168,5355,5361,5764,5919,6352,6363,6373,6376,6387,6504,6558,7060,7162,7412,7473,8633,9023,9353,9355,9499,9638,10371,10512,10663,23022,23768,25960,27020,30817,55742,56833,59352,80031,80310,83700,91624,9…	AIF1,ALCAM,ALOX5,ANXA1,BMP4,BST1,CD74,CHN1,CCR5,CCR7,CSF1R,CX3CR1,DOCK2,DPP4,DPYSL2,DUSP1,GPR183,LPAR1,EFNA5,EPHA5,FGF2,FGF7,FOXD1,FOLR2,GAS6,GLI2,GLI3,GPR18,GSTP1,NCKAP1L,HGF,CXCL10,ISL1,ITGB3,KIT,LAMA2,LGALS3,LSP1,CXCL9,NTF3,NTRK3,ENPP2,PLP2,PLXNA1,PTN,RARRES2,CCL5,CCL19,CXCL11,CX3CL1,CXCL12,SLAMF1,SLC12A2,THBS4,TPBG,VCAM1,WNT3,UNC5C,CH25H,SLIT2,LHX2,MYOT,FEZ1,SEMA3A,SEMA3C,CXCR6,PALLD,FLRT2,AD…
4_Member	GO Biological Processes	GO:0006935	chemotaxis	-22.5678	-19.119	86/607	199,214,240,301,652,683,972,1123,1234,1236,1436,1524,1794,1803,1808,1843,1880,1902,1946,2044,2247,2252,2297,2350,2621,2736,2737,2841,2950,3071,3082,3627,3670,3690,3815,3908,3958,4046,4283,4908,4916,5168,5355,5361,5764,5919,6352,6363,6373,6376,6387,6504,6558,7060,7162,7412,7473,8633,9023,9353,9355,9499,9638,10371,10512,10663,23022,23768,25960,27020,30817,55742,56833,59352,80031,80310,83700,91624,9…	AIF1,ALCAM,ALOX5,ANXA1,BMP4,BST1,CD74,CHN1,CCR5,CCR7,CSF1R,CX3CR1,DOCK2,DPP4,DPYSL2,DUSP1,GPR183,LPAR1,EFNA5,EPHA5,FGF2,FGF7,FOXD1,FOLR2,GAS6,GLI2,GLI3,GPR18,GSTP1,NCKAP1L,HGF,CXCL10,ISL1,ITGB3,KIT,LAMA2,LGALS3,LSP1,CXCL9,NTF3,NTRK3,ENPP2,PLP2,PLXNA1,PTN,RARRES2,CCL5,CCL19,CXCL11,CX3CL1,CXCL12,SLAMF1,SLC12A2,THBS4,TPBG,VCAM1,WNT3,UNC5C,CH25H,SLIT2,LHX2,MYOT,FEZ1,SEMA3A,SEMA3C,CXCR6,PALLD,FLRT2,AD…
4_Member	GO Biological Processes	GO:0042330	taxis	-22.4214	-19.0237	86/610	199,214,240,301,652,683,972,1123,1234,1236,1436,1524,1794,1803,1808,1843,1880,1902,1946,2044,2247,2252,2297,2350,2621,2736,2737,2841,2950,3071,3082,3627,3670,3690,3815,3908,3958,4046,4283,4908,4916,5168,5355,5361,5764,5919,6352,6363,6373,6376,6387,6504,6558,7060,7162,7412,7473,8633,9023,9353,9355,9499,9638,10371,10512,10663,23022,23768,25960,27020,30817,55742,56833,59352,80031,80310,83700,91624,9…	AIF1,ALCAM,ALOX5,ANXA1,BMP4,BST1,CD74,CHN1,CCR5,CCR7,CSF1R,CX3CR1,DOCK2,DPP4,DPYSL2,DUSP1,GPR183,LPAR1,EFNA5,EPHA5,FGF2,FGF7,FOXD1,FOLR2,GAS6,GLI2,GLI3,GPR18,GSTP1,NCKAP1L,HGF,CXCL10,ISL1,ITGB3,KIT,LAMA2,LGALS3,LSP1,CXCL9,NTF3,NTRK3,ENPP2,PLP2,PLXNA1,PTN,RARRES2,CCL5,CCL19,CXCL11,CX3CL1,CXCL12,SLAMF1,SLC12A2,THBS4,TPBG,VCAM1,WNT3,UNC5C,CH25H,SLIT2,LHX2,MYOT,FEZ1,SEMA3A,SEMA3C,CXCR6,PALLD,FLRT2,AD…
4_Member	GO Biological Processes	GO:0000904	cell morphogenesis involved in differentiation	-15.5984	-12.8697	80/694	60,214,558,577,1009,1123,1306,1808,1946,2044,2192,2297,2316,2633,2736,2737,3611,3670,3676,3690,3908,4168,4208,4352,4653,4692,5063,5295,5361,5532,5764,5789,5881,6277,6285,6387,6474,7010,7162,7414,7473,8324,8516,8633,9353,9355,9499,9638,10090,10371,10512,10630,22891,23022,23043,23072,23111,23189,23768,25932,26052,27020,51393,54413,55619,55679,55742,55920,59352,80031,84168,91624,91653,120892,137970,…	ACTB,ALCAM,AXL,ADGRB3,CDH11,CHN1,COL15A1,DPYSL2,EFNA5,EPHA5,FBLN1,FOXD1,FLNA,GBP1,GLI2,GLI3,ILK,ISL1,ITGA4,ITGB3,LAMA2,MCF2,MEF2C,MPL,MYOC,NDN,PAK3,PIK3R1,PLXNA1,PPP3CB,PTN,PTPRD,RAC3,S100A6,S100B,CXCL12,SHOX2,TEK,TPBG,VCL,WNT3,FZD7,ITGA8,UNC5C,SLIT2,LHX2,MYOT,FEZ1,UST,SEMA3A,SEMA3C,PDPN,ZNF365,PALLD,TNIK,HECW1,SPART,KANK1,FLRT2,CLIC4,DNM3,NPTN,TRPV2,NLGN3,DOCK10,LIMS2,PARVA,RCC2,LGR6,SEMA6D,ANTX…
4_Member	GO Biological Processes	GO:0032989	cellular component morphogenesis	-13.9405	-11.4211	80/743	60,70,214,577,1009,1123,1465,1808,1946,2044,2297,2697,2736,2737,2823,3071,3110,3611,3670,3676,3908,4168,4629,4692,4908,5063,5168,5239,5361,5376,5532,5764,5789,6277,6285,6387,6474,7097,7111,7162,7414,7473,8633,9172,9353,9355,9499,9638,9699,10090,10371,10512,10630,11155,22891,23022,23043,23072,23111,23136,23189,23768,25802,26052,27020,29993,51393,54413,55022,55619,59352,80031,80206,91624,91653,1208…	ACTB,ACTC1,ALCAM,ADGRB3,CDH11,CHN1,CSRP1,DPYSL2,EFNA5,EPHA5,FOXD1,GJA1,GLI2,GLI3,GPM6A,NCKAP1L,MNX1,ILK,ISL1,ITGA4,LAMA2,MCF2,MYH11,NDN,NTF3,PAK3,ENPP2,PGM5,PLXNA1,PMP22,PPP3CB,PTN,PTPRD,S100A6,S100B,CXCL12,SHOX2,TLR2,TMOD1,TPBG,VCL,WNT3,UNC5C,MYOM2,SLIT2,LHX2,MYOT,FEZ1,RIMS2,UST,SEMA3A,SEMA3C,PDPN,LDB3,ZNF365,PALLD,TNIK,HECW1,SPART,EPB41L3,KANK1,FLRT2,LMOD1,DNM3,NPTN,PACSIN1,TRPV2,NLGN3,PID1,DOC…
4_Member	GO Biological Processes	GO:0120039	plasma membrane bounded cell projection morphogenesis	-12.004	-9.65639	68/629	60,214,577,1009,1123,1808,1946,2044,2297,2697,2736,2737,2823,3071,3110,3611,3670,3676,3908,4168,4692,4908,5063,5168,5361,5532,5764,5789,6277,6285,6387,6474,7162,7414,7473,8633,9353,9355,9499,9638,9699,10090,10371,10512,10630,22891,23022,23043,23072,23111,23136,23189,23768,26052,27020,29993,51393,54413,55619,59352,80031,91624,91653,120892,137970,140578,345651,374946	ACTB,ALCAM,ADGRB3,CDH11,CHN1,DPYSL2,EFNA5,EPHA5,FOXD1,GJA1,GLI2,GLI3,GPM6A,NCKAP1L,MNX1,ILK,ISL1,ITGA4,LAMA2,MCF2,NDN,NTF3,PAK3,ENPP2,PLXNA1,PPP3CB,PTN,PTPRD,S100A6,S100B,CXCL12,SHOX2,TPBG,VCL,WNT3,UNC5C,SLIT2,LHX2,MYOT,FEZ1,RIMS2,UST,SEMA3A,SEMA3C,PDPN,ZNF365,PALLD,TNIK,HECW1,SPART,EPB41L3,KANK1,FLRT2,DNM3,NPTN,PACSIN1,TRPV2,NLGN3,DOCK10,LGR6,SEMA6D,NEXN,BOC,LRRK2,UNC5D,CHODL,ACTBL2,DRAXIN
4_Member	GO Biological Processes	GO:0048858	cell projection morphogenesis	-11.876	-9.54114	68/633	60,214,577,1009,1123,1808,1946,2044,2297,2697,2736,2737,2823,3071,3110,3611,3670,3676,3908,4168,4692,4908,5063,5168,5361,5532,5764,5789,6277,6285,6387,6474,7162,7414,7473,8633,9353,9355,9499,9638,9699,10090,10371,10512,10630,22891,23022,23043,23072,23111,23136,23189,23768,26052,27020,29993,51393,54413,55619,59352,80031,91624,91653,120892,137970,140578,345651,374946	ACTB,ALCAM,ADGRB3,CDH11,CHN1,DPYSL2,EFNA5,EPHA5,FOXD1,GJA1,GLI2,GLI3,GPM6A,NCKAP1L,MNX1,ILK,ISL1,ITGA4,LAMA2,MCF2,NDN,NTF3,PAK3,ENPP2,PLXNA1,PPP3CB,PTN,PTPRD,S100A6,S100B,CXCL12,SHOX2,TPBG,VCL,WNT3,UNC5C,SLIT2,LHX2,MYOT,FEZ1,RIMS2,UST,SEMA3A,SEMA3C,PDPN,ZNF365,PALLD,TNIK,HECW1,SPART,EPB41L3,KANK1,FLRT2,DNM3,NPTN,PACSIN1,TRPV2,NLGN3,DOCK10,LGR6,SEMA6D,NEXN,BOC,LRRK2,UNC5D,CHODL,ACTBL2,DRAXIN
4_Member	GO Biological Processes	GO:0032990	cell part morphogenesis	-11.7693	-9.44266	69/651	60,214,577,1009,1123,1808,1946,2044,2297,2697,2736,2737,2823,3071,3110,3611,3670,3676,3908,4168,4692,4908,5063,5168,5361,5532,5764,5789,6277,6285,6387,6474,7162,7414,7473,8633,9353,9355,9499,9638,9699,10090,10371,10512,10630,22891,23022,23043,23072,23111,23136,23189,23768,26052,27020,29993,51393,54413,55022,55619,59352,80031,91624,91653,120892,137970,140578,345651,374946	ACTB,ALCAM,ADGRB3,CDH11,CHN1,DPYSL2,EFNA5,EPHA5,FOXD1,GJA1,GLI2,GLI3,GPM6A,NCKAP1L,MNX1,ILK,ISL1,ITGA4,LAMA2,MCF2,NDN,NTF3,PAK3,ENPP2,PLXNA1,PPP3CB,PTN,PTPRD,S100A6,S100B,CXCL12,SHOX2,TPBG,VCL,WNT3,UNC5C,SLIT2,LHX2,MYOT,FEZ1,RIMS2,UST,SEMA3A,SEMA3C,PDPN,ZNF365,PALLD,TNIK,HECW1,SPART,EPB41L3,KANK1,FLRT2,DNM3,NPTN,PACSIN1,TRPV2,NLGN3,PID1,DOCK10,LGR6,SEMA6D,NEXN,BOC,LRRK2,UNC5D,CHODL,ACTBL2,DRAXIN
4_Member	GO Biological Processes	GO:0048812	neuron projection morphogenesis	-11.0956	-8.85767	65/614	60,214,577,1009,1123,1808,1946,2044,2297,2697,2736,2737,2823,3071,3110,3611,3670,3676,3908,4168,4692,4908,5063,5361,5532,5764,5789,6277,6285,6387,6474,7162,7414,7473,8633,9353,9355,9499,9638,9699,10090,10371,10512,22891,23022,23043,23072,23111,23136,23768,26052,27020,29993,51393,54413,55619,59352,80031,91624,91653,120892,137970,140578,345651,374946	ACTB,ALCAM,ADGRB3,CDH11,CHN1,DPYSL2,EFNA5,EPHA5,FOXD1,GJA1,GLI2,GLI3,GPM6A,NCKAP1L,MNX1,ILK,ISL1,ITGA4,LAMA2,MCF2,NDN,NTF3,PAK3,PLXNA1,PPP3CB,PTN,PTPRD,S100A6,S100B,CXCL12,SHOX2,TPBG,VCL,WNT3,UNC5C,SLIT2,LHX2,MYOT,FEZ1,RIMS2,UST,SEMA3A,SEMA3C,ZNF365,PALLD,TNIK,HECW1,SPART,EPB41L3,FLRT2,DNM3,NPTN,PACSIN1,TRPV2,NLGN3,DOCK10,LGR6,SEMA6D,NEXN,BOC,LRRK2,UNC5D,CHODL,ACTBL2,DRAXIN
4_Member	GO Biological Processes	GO:0031344	regulation of cell projection organization	-10.6664	-8.47284	68/673	577,653,857,952,1123,1236,1608,1809,1902,2213,2316,2823,3082,3611,3815,3956,4168,4916,5063,5168,5176,5295,5361,5376,5764,5789,6363,6376,6387,6422,6423,6474,7043,7431,7473,9353,9638,10090,10178,10253,10371,10512,10602,10630,22891,23043,23072,23111,23189,23413,26052,27020,29993,51364,51393,55704,55920,57451,79625,80031,83478,120892,128344,139818,140578,257194,374403,374946	ADGRB3,BMP5,CAV1,CD38,CHN1,CCR7,DGKG,DPYSL3,LPAR1,FCGR2B,FLNA,GPM6A,HGF,ILK,KIT,LGALS1,MCF2,NTRK3,PAK3,ENPP2,SERPINF1,PIK3R1,PLXNA1,PMP22,PTN,PTPRD,CCL19,CX3CL1,CXCL12,SFRP1,SFRP2,SHOX2,TGFB3,VIM,WNT3,SLIT2,FEZ1,UST,TENM1,SPRY2,SEMA3A,SEMA3C,CDC42EP3,PDPN,ZNF365,TNIK,HECW1,SPART,KANK1,NCS1,DNM3,NPTN,PACSIN1,ZMYND10,TRPV2,CCDC88A,RCC2,TENM2,NDNF,SEMA6D,ARHGAP24,LRRK2,PIFO,DOCK11,CHODL,NEGR1,TBC1D1…
4_Member	GO Biological Processes	GO:0048667	cell morphogenesis involved in neuron differentiation	-10.5467	-8.37374	59/544	60,214,577,1009,1123,1808,1946,2044,2297,2736,2737,3611,3670,3676,3908,4168,4208,4692,5063,5361,5532,5764,5789,6277,6285,6387,6474,7162,7414,7473,8633,9353,9355,9499,9638,10090,10371,10512,22891,23022,23043,23072,23111,23768,26052,27020,51393,54413,55619,59352,80031,91624,91653,120892,137970,140578,286262,345651,374946	ACTB,ALCAM,ADGRB3,CDH11,CHN1,DPYSL2,EFNA5,EPHA5,FOXD1,GLI2,GLI3,ILK,ISL1,ITGA4,LAMA2,MCF2,MEF2C,NDN,PAK3,PLXNA1,PPP3CB,PTN,PTPRD,S100A6,S100B,CXCL12,SHOX2,TPBG,VCL,WNT3,UNC5C,SLIT2,LHX2,MYOT,FEZ1,UST,SEMA3A,SEMA3C,ZNF365,PALLD,TNIK,HECW1,SPART,FLRT2,DNM3,NPTN,TRPV2,NLGN3,DOCK10,LGR6,SEMA6D,NEXN,BOC,LRRK2,UNC5D,CHODL,TPRN,ACTBL2,DRAXIN
4_Member	GO Biological Processes	GO:0120035	regulation of plasma membrane bounded cell projection organization	-10.3176	-8.16434	66/655	577,653,857,952,1123,1236,1608,1809,1902,2213,2316,2823,3082,3611,3815,3956,4168,4916,5063,5168,5176,5295,5361,5376,5764,5789,6363,6376,6387,6422,6423,6474,7043,7431,7473,9353,9638,10090,10178,10371,10512,10602,10630,22891,23043,23072,23111,23189,23413,26052,27020,29993,51364,51393,55704,55920,57451,79625,80031,83478,120892,139818,140578,257194,374403,374946	ADGRB3,BMP5,CAV1,CD38,CHN1,CCR7,DGKG,DPYSL3,LPAR1,FCGR2B,FLNA,GPM6A,HGF,ILK,KIT,LGALS1,MCF2,NTRK3,PAK3,ENPP2,SERPINF1,PIK3R1,PLXNA1,PMP22,PTN,PTPRD,CCL19,CX3CL1,CXCL12,SFRP1,SFRP2,SHOX2,TGFB3,VIM,WNT3,SLIT2,FEZ1,UST,TENM1,SEMA3A,SEMA3C,CDC42EP3,PDPN,ZNF365,TNIK,HECW1,SPART,KANK1,NCS1,DNM3,NPTN,PACSIN1,ZMYND10,TRPV2,CCDC88A,RCC2,TENM2,NDNF,SEMA6D,ARHGAP24,LRRK2,DOCK11,CHODL,NEGR1,TBC1D10C,DRAXIN
4_Member	GO Biological Processes	GO:0061564	axon development	-10.2621	-8.11706	53/467	60,214,1009,1123,1808,1946,2044,2297,2316,2736,2737,3611,3670,3676,3908,4168,4692,5063,5354,5361,5532,5764,6277,6285,6387,6474,7414,7473,8633,9315,9353,9355,9499,9638,10090,10100,10371,10512,23022,23111,23768,27020,51393,54413,59352,80031,83700,91624,91653,137970,140578,345651,374946	ACTB,ALCAM,CDH11,CHN1,DPYSL2,EFNA5,EPHA5,FOXD1,FLNA,GLI2,GLI3,ILK,ISL1,ITGA4,LAMA2,MCF2,NDN,PAK3,PLP1,PLXNA1,PPP3CB,PTN,S100A6,S100B,CXCL12,SHOX2,VCL,WNT3,UNC5C,NREP,SLIT2,LHX2,MYOT,FEZ1,UST,TSPAN2,SEMA3A,SEMA3C,PALLD,SPART,FLRT2,NPTN,TRPV2,NLGN3,LGR6,SEMA6D,JAM3,NEXN,BOC,UNC5D,CHODL,ACTBL2,DRAXIN
4_Member	GO Biological Processes	GO:0007409	axonogenesis	-9.03924	-7.00955	47/418	60,214,1009,1123,1808,1946,2044,2297,2736,2737,3611,3670,3676,3908,4168,4692,5063,5361,5532,6277,6285,6387,6474,7414,7473,8633,9353,9355,9499,9638,10090,10371,10512,23022,23111,23768,27020,51393,54413,59352,80031,91624,91653,137970,140578,345651,374946	ACTB,ALCAM,CDH11,CHN1,DPYSL2,EFNA5,EPHA5,FOXD1,GLI2,GLI3,ILK,ISL1,ITGA4,LAMA2,MCF2,NDN,PAK3,PLXNA1,PPP3CB,S100A6,S100B,CXCL12,SHOX2,VCL,WNT3,UNC5C,SLIT2,LHX2,MYOT,FEZ1,UST,SEMA3A,SEMA3C,PALLD,SPART,FLRT2,NPTN,TRPV2,NLGN3,LGR6,SEMA6D,NEXN,BOC,UNC5D,CHODL,ACTBL2,DRAXIN
4_Member	GO Biological Processes	GO:0010975	regulation of neuron projection development	-8.61888	-6.65078	48/445	577,653,952,1123,1608,1809,1902,2316,3082,3611,3956,4168,4916,5063,5176,5361,5376,5764,5789,6376,6387,6422,6423,6474,7431,7473,9353,9638,10090,10371,10512,22891,23043,23072,23111,23189,23413,26052,27020,29993,51393,55704,79625,80031,120892,140578,257194,374946	ADGRB3,BMP5,CD38,CHN1,DGKG,DPYSL3,LPAR1,FLNA,HGF,ILK,LGALS1,MCF2,NTRK3,PAK3,SERPINF1,PLXNA1,PMP22,PTN,PTPRD,CX3CL1,CXCL12,SFRP1,SFRP2,SHOX2,VIM,WNT3,SLIT2,FEZ1,UST,SEMA3A,SEMA3C,ZNF365,TNIK,HECW1,SPART,KANK1,NCS1,DNM3,NPTN,PACSIN1,TRPV2,CCDC88A,NDNF,SEMA6D,LRRK2,CHODL,NEGR1,DRAXIN
4_Member	GO Biological Processes	GO:0060284	regulation of cell development	-7.3809	-5.53005	49/502	652,1524,1946,2192,2200,2316,2487,2633,2737,3398,3479,3611,3815,4168,4311,4352,4653,4916,5063,5176,5361,5764,5789,5881,6376,6387,6474,7097,7414,7473,7732,9353,9355,10371,10512,22891,23111,23189,23500,25960,27020,51393,55679,55920,56833,80031,120892,140578,374946	BMP4,CX3CR1,EFNA5,FBLN1,FBN1,FLNA,FRZB,GBP1,GLI3,ID2,IGF1,ILK,KIT,MCF2,MME,MPL,MYOC,NTRK3,PAK3,SERPINF1,PLXNA1,PTN,PTPRD,RAC3,CX3CL1,CXCL12,SHOX2,TLR2,VCL,WNT3,RNF112,SLIT2,LHX2,SEMA3A,SEMA3C,ZNF365,SPART,KANK1,DAAM2,ADGRA2,NPTN,TRPV2,LIMS2,RCC2,SLAMF8,SEMA6D,LRRK2,CHODL,DRAXIN
4_Member	GO Biological Processes	GO:0007411	axon guidance	-7.003	-5.18384	29/227	214,1123,1808,1946,2044,2297,2736,2737,3670,3908,5361,6387,7473,8633,9353,9355,9499,9638,10371,10512,23022,23768,27020,59352,80031,91624,91653,137970,374946	ALCAM,CHN1,DPYSL2,EFNA5,EPHA5,FOXD1,GLI2,GLI3,ISL1,LAMA2,PLXNA1,CXCL12,WNT3,UNC5C,SLIT2,LHX2,MYOT,FEZ1,SEMA3A,SEMA3C,PALLD,FLRT2,NPTN,LGR6,SEMA6D,NEXN,BOC,UNC5D,DRAXIN
4_Member	GO Biological Processes	GO:0097485	neuron projection guidance	-6.96133	-5.14975	29/228	214,1123,1808,1946,2044,2297,2736,2737,3670,3908,5361,6387,7473,8633,9353,9355,9499,9638,10371,10512,23022,23768,27020,59352,80031,91624,91653,137970,374946	ALCAM,CHN1,DPYSL2,EFNA5,EPHA5,FOXD1,GLI2,GLI3,ISL1,LAMA2,PLXNA1,CXCL12,WNT3,UNC5C,SLIT2,LHX2,MYOT,FEZ1,SEMA3A,SEMA3C,PALLD,FLRT2,NPTN,LGR6,SEMA6D,NEXN,BOC,UNC5D,DRAXIN
4_Member	GO Biological Processes	GO:0031346	positive regulation of cell projection organization	-6.48264	-4.71956	37/353	653,1236,1809,2316,2823,3082,3611,3815,4916,5063,5168,5176,5295,5361,5764,5789,6363,6376,6387,6474,7043,7473,9353,9638,10178,10602,26052,27020,29993,51364,51393,55704,57451,79625,139818,140578,257194	BMP5,CCR7,DPYSL3,FLNA,GPM6A,HGF,ILK,KIT,NTRK3,PAK3,ENPP2,SERPINF1,PIK3R1,PLXNA1,PTN,PTPRD,CCL19,CX3CL1,CXCL12,SHOX2,TGFB3,WNT3,SLIT2,FEZ1,TENM1,CDC42EP3,DNM3,NPTN,PACSIN1,ZMYND10,TRPV2,CCDC88A,TENM2,NDNF,DOCK11,CHODL,NEGR1
4_Member	GO Biological Processes	GO:0051960	regulation of nervous system development	-6.08385	-4.36641	42/443	577,1524,2737,3082,3398,3611,3815,4168,4311,4916,5063,5176,5361,5764,5789,5915,6285,6376,6387,6474,7097,7162,7473,7732,8530,9353,9355,10371,10512,22891,23111,23266,23500,23768,27020,51393,54413,58494,79953,80031,140578,374946	ADGRB3,CX3CR1,GLI3,HGF,ID2,ILK,KIT,MCF2,MME,NTRK3,PAK3,SERPINF1,PLXNA1,PTN,PTPRD,RARB,S100B,CX3CL1,CXCL12,SHOX2,TLR2,TPBG,WNT3,RNF112,CST7,SLIT2,LHX2,SEMA3A,SEMA3C,ZNF365,SPART,ADGRL2,DAAM2,FLRT2,NPTN,TRPV2,NLGN3,JAM2,SYNDIG1,SEMA6D,CHODL,DRAXIN
4_Member	GO Biological Processes	GO:0051962	positive regulation of nervous system development	-4.91899	-3.35947	28/272	577,1524,2737,3398,3611,3815,4311,5063,5176,5361,5764,5789,6376,6387,6474,7097,7162,7473,7732,9353,22891,23266,23768,27020,51393,54413,79953,140578	ADGRB3,CX3CR1,GLI3,ID2,ILK,KIT,MME,PAK3,SERPINF1,PLXNA1,PTN,PTPRD,CX3CL1,CXCL12,SHOX2,TLR2,TPBG,WNT3,RNF112,SLIT2,ZNF365,ADGRL2,FLRT2,NPTN,TRPV2,NLGN3,SYNDIG1,CHODL
4_Member	GO Biological Processes	GO:0010720	positive regulation of cell development	-4.25155	-2.76946	31/298	652,1524,2316,2664,2737,3398,3611,3815,4311,4352,4653,5063,5176,5361,5764,5789,5881,6376,6387,6474,7097,7473,7732,9353,10979,22891,23376,27020,51393,55679,140578	BMP4,CX3CR1,FLNA,GDI1,GLI3,ID2,ILK,KIT,MME,MPL,MYOC,PAK3,SERPINF1,PLXNA1,PTN,PTPRD,RAC3,CX3CL1,CXCL12,SHOX2,TLR2,WNT3,RNF112,SLIT2,FERMT2,ZNF365,UFL1,NPTN,TRPV2,LIMS2,CHODL
4_Member	GO Biological Processes	GO:0050767	regulation of neurogenesis	-3.79208	-2.39344	31/364	1524,2737,3398,3611,3815,4168,4311,4916,5063,5176,5361,5764,5789,6376,6387,6474,7097,7473,7732,9353,9355,10371,10512,22891,23111,23500,27020,51393,80031,140578,374946	CX3CR1,GLI3,ID2,ILK,KIT,MCF2,MME,NTRK3,PAK3,SERPINF1,PLXNA1,PTN,PTPRD,CX3CL1,CXCL12,SHOX2,TLR2,WNT3,RNF112,SLIT2,LHX2,SEMA3A,SEMA3C,ZNF365,SPART,DAAM2,NPTN,TRPV2,SEMA6D,CHODL,DRAXIN
4_Member	GO Biological Processes	GO:0050769	positive regulation of neurogenesis	-3.67791	-2.30372	22/225	1524,2737,3398,3611,3815,4311,5063,5176,5361,5764,5789,6376,6387,6474,7097,7473,7732,9353,22891,27020,51393,140578	CX3CR1,GLI3,ID2,ILK,KIT,MME,PAK3,SERPINF1,PLXNA1,PTN,PTPRD,CX3CL1,CXCL12,SHOX2,TLR2,WNT3,RNF112,SLIT2,ZNF365,NPTN,TRPV2,CHODL
5_Summary	GO Biological Processes	GO:0002252	immune effector process	-20.3017	-17.0959	86/656	2,301,640,695,715,716,730,911,912,913,925,930,939,940,972,1191,1511,1524,1675,1794,1880,2213,2294,3071,3075,3106,3113,3115,3118,3119,3120,3122,3123,3125,3126,3127,3134,3136,3394,3426,3575,3598,3606,3683,3684,3815,3821,3956,3958,4068,4239,5272,5336,5450,5532,5730,5788,5873,6363,6504,7043,7098,7805,8547,8807,8832,9452,10225,10875,11035,11213,23180,23228,26191,30009,30817,54518,55619,56253,56833,578…	A2M,ANXA1,BLK,BTK,C1R,C1S,C7,CD1C,CD1D,CD1E,CD8A,CD19,CD27,CD28,CD74,CLU,CTSG,CX3CR1,CFD,DOCK2,GPR183,FCGR2B,FOXF1,NCKAP1L,CFH,HLA-B,HLA-DPA1,HLA-DPB1,HLA-DQA2,HLA-DQB1,HLA-DQB2,HLA-DRA,HLA-DRB1,HLA-DRB3,HLA-DRB4,HLA-DRB5,HLA-F,HLA-H,IRF8,CFI,IL7R,IL13RA2,IL18,ITGAL,ITGAM,KIT,KLRC1,LGALS1,LGALS3,SH2D1A,MFAP4,SERPINB9,PLCG2,POU2AF1,PPP3CB,PTGDS,PTPRC,RAB27A,CCL19,SLAMF1,TGFB3,TLR3,LAPTM5,FCN3,IL18…
5_Member	GO Biological Processes	GO:0002252	immune effector process	-20.3017	-17.0959	86/656	2,301,640,695,715,716,730,911,912,913,925,930,939,940,972,1191,1511,1524,1675,1794,1880,2213,2294,3071,3075,3106,3113,3115,3118,3119,3120,3122,3123,3125,3126,3127,3134,3136,3394,3426,3575,3598,3606,3683,3684,3815,3821,3956,3958,4068,4239,5272,5336,5450,5532,5730,5788,5873,6363,6504,7043,7098,7805,8547,8807,8832,9452,10225,10875,11035,11213,23180,23228,26191,30009,30817,54518,55619,56253,56833,578…	A2M,ANXA1,BLK,BTK,C1R,C1S,C7,CD1C,CD1D,CD1E,CD8A,CD19,CD27,CD28,CD74,CLU,CTSG,CX3CR1,CFD,DOCK2,GPR183,FCGR2B,FOXF1,NCKAP1L,CFH,HLA-B,HLA-DPA1,HLA-DPB1,HLA-DQA2,HLA-DQB1,HLA-DQB2,HLA-DRA,HLA-DRB1,HLA-DRB3,HLA-DRB4,HLA-DRB5,HLA-F,HLA-H,IRF8,CFI,IL7R,IL13RA2,IL18,ITGAL,ITGAM,KIT,KLRC1,LGALS1,LGALS3,SH2D1A,MFAP4,SERPINB9,PLCG2,POU2AF1,PPP3CB,PTGDS,PTPRC,RAB27A,CCL19,SLAMF1,TGFB3,TLR3,LAPTM5,FCN3,IL18…
5_Member	GO Biological Processes	GO:0002697	regulation of immune effector process	-14.5414	-11.9453	51/341	2,301,640,695,911,912,913,940,972,1524,2213,2294,3071,3075,3106,3122,3123,3125,3134,3136,3575,3598,3606,3684,3815,3821,3958,4068,5272,5336,5532,5788,6363,6504,7043,7098,7805,8807,8832,10225,10875,11035,11213,26191,30009,30817,56253,56833,114548,117854,257101	A2M,ANXA1,BLK,BTK,CD1C,CD1D,CD1E,CD28,CD74,CX3CR1,FCGR2B,FOXF1,NCKAP1L,CFH,HLA-B,HLA-DRA,HLA-DRB1,HLA-DRB3,HLA-F,HLA-H,IL7R,IL13RA2,IL18,ITGAM,KIT,KLRC1,LGALS3,SH2D1A,SERPINB9,PLCG2,PPP3CB,PTPRC,CCL19,SLAMF1,TGFB3,TLR3,LAPTM5,IL18RAP,CD84,CD96,FGL2,RIPK3,IRAK3,PTPN22,TBX21,ADGRE2,CRTAM,SLAMF8,NLRP3,TRIM6,ZNF683
5_Member	GO Biological Processes	GO:0002443	leukocyte mediated immunity	-14.4241	-11.8575	59/442	640,695,715,716,730,911,912,913,925,930,939,940,972,1191,1511,1524,2213,2294,3071,3106,3113,3115,3118,3119,3120,3122,3123,3125,3126,3127,3134,3136,3426,3575,3598,3606,3684,3815,3821,4068,5272,5336,5532,5730,5788,5873,6504,7098,8807,8832,10225,11035,23180,30009,30817,56253,57823,114548,100423062	BLK,BTK,C1R,C1S,C7,CD1C,CD1D,CD1E,CD8A,CD19,CD27,CD28,CD74,CLU,CTSG,CX3CR1,FCGR2B,FOXF1,NCKAP1L,HLA-B,HLA-DPA1,HLA-DPB1,HLA-DQA2,HLA-DQB1,HLA-DQB2,HLA-DRA,HLA-DRB1,HLA-DRB3,HLA-DRB4,HLA-DRB5,HLA-F,HLA-H,CFI,IL7R,IL13RA2,IL18,ITGAM,KIT,KLRC1,SH2D1A,SERPINB9,PLCG2,PPP3CB,PTGDS,PTPRC,RAB27A,SLAMF1,TLR3,IL18RAP,CD84,CD96,RIPK3,RFTN1,TBX21,ADGRE2,CRTAM,SLAMF7,NLRP3,IGLL5
5_Member	GO Biological Processes	GO:0002449	lymphocyte mediated immunity	-12.2387	-9.86901	48/351	695,715,716,730,911,912,913,925,930,939,940,972,1191,2213,3071,3106,3113,3115,3118,3119,3120,3122,3123,3125,3126,3127,3134,3136,3426,3575,3598,3606,3821,4068,5272,5532,5788,5873,6504,8807,10225,11035,23180,30009,56253,57823,114548,100423062	BTK,C1R,C1S,C7,CD1C,CD1D,CD1E,CD8A,CD19,CD27,CD28,CD74,CLU,FCGR2B,NCKAP1L,HLA-B,HLA-DPA1,HLA-DPB1,HLA-DQA2,HLA-DQB1,HLA-DQB2,HLA-DRA,HLA-DRB1,HLA-DRB3,HLA-DRB4,HLA-DRB5,HLA-F,HLA-H,CFI,IL7R,IL13RA2,IL18,KLRC1,SH2D1A,SERPINB9,PPP3CB,PTPRC,RAB27A,SLAMF1,IL18RAP,CD96,RIPK3,RFTN1,TBX21,CRTAM,SLAMF7,NLRP3,IGLL5
5_Member	GO Biological Processes	GO:0002703	regulation of leukocyte mediated immunity	-11.8717	-9.54099	37/227	640,695,911,912,913,940,1524,2213,2294,3071,3106,3122,3123,3125,3134,3136,3575,3598,3606,3684,3815,3821,4068,5272,5336,5532,5788,6504,7098,8807,8832,10225,11035,30009,30817,56253,114548	BLK,BTK,CD1C,CD1D,CD1E,CD28,CX3CR1,FCGR2B,FOXF1,NCKAP1L,HLA-B,HLA-DRA,HLA-DRB1,HLA-DRB3,HLA-F,HLA-H,IL7R,IL13RA2,IL18,ITGAM,KIT,KLRC1,SH2D1A,SERPINB9,PLCG2,PPP3CB,PTPRC,SLAMF1,TLR3,IL18RAP,CD84,CD96,RIPK3,TBX21,ADGRE2,CRTAM,NLRP3
5_Member	GO Biological Processes	GO:0002460	adaptive immune response based on somatic recombination of immune receptors built from immunoglobulin superfamily domains	-11.3987	-9.0999	47/357	301,695,715,716,730,911,912,913,925,930,939,940,972,1191,2213,3071,3106,3113,3115,3118,3119,3120,3122,3123,3125,3126,3127,3134,3136,3426,3575,3598,3606,3821,4208,5321,5532,5788,5873,6363,6504,11035,23180,30009,56253,114548,100423062	ANXA1,BTK,C1R,C1S,C7,CD1C,CD1D,CD1E,CD8A,CD19,CD27,CD28,CD74,CLU,FCGR2B,NCKAP1L,HLA-B,HLA-DPA1,HLA-DPB1,HLA-DQA2,HLA-DQB1,HLA-DQB2,HLA-DRA,HLA-DRB1,HLA-DRB3,HLA-DRB4,HLA-DRB5,HLA-F,HLA-H,CFI,IL7R,IL13RA2,IL18,KLRC1,MEF2C,PLA2G4A,PPP3CB,PTPRC,RAB27A,CCL19,SLAMF1,RIPK3,RFTN1,TBX21,CRTAM,NLRP3,IGLL5
5_Member	GO Biological Processes	GO:0001913	T cell mediated cytotoxicity	-10.8932	-8.67163	17/51	911,912,913,2213,3071,3106,3122,3123,3134,3136,3575,3821,5532,5788,5873,11035,56253	CD1C,CD1D,CD1E,FCGR2B,NCKAP1L,HLA-B,HLA-DRA,HLA-DRB1,HLA-F,HLA-H,IL7R,KLRC1,PPP3CB,PTPRC,RAB27A,RIPK3,CRTAM
5_Member	GO Biological Processes	GO:0001910	regulation of leukocyte mediated cytotoxicity	-10.8117	-8.59966	21/82	911,912,913,1524,2213,3071,3106,3122,3123,3134,3136,3575,3684,3821,4068,5272,5532,5788,8807,11035,56253	CD1C,CD1D,CD1E,CX3CR1,FCGR2B,NCKAP1L,HLA-B,HLA-DRA,HLA-DRB1,HLA-F,HLA-H,IL7R,ITGAM,KLRC1,SH2D1A,SERPINB9,PPP3CB,PTPRC,IL18RAP,RIPK3,CRTAM
5_Member	GO Biological Processes	GO:0002250	adaptive immune response	-10.7722	-8.56334	72/730	214,301,384,608,695,715,716,730,911,912,913,915,917,919,925,930,939,940,962,972,1191,1524,1880,2213,3071,3106,3107,3113,3115,3118,3119,3120,3122,3123,3125,3126,3127,3134,3136,3426,3512,3575,3598,3606,3702,3821,3903,4068,4208,5321,5532,5579,5788,5873,6363,6504,7535,8631,8832,10462,11035,23180,27240,30009,50852,56253,57823,64092,83700,114548,257101,100423062	ALCAM,ANXA1,ARG2,TNFRSF17,BTK,C1R,C1S,C7,CD1C,CD1D,CD1E,CD3D,CD3G,CD247,CD8A,CD19,CD27,CD28,CD48,CD74,CLU,CX3CR1,GPR183,FCGR2B,NCKAP1L,HLA-B,HLA-C,HLA-DPA1,HLA-DPB1,HLA-DQA2,HLA-DQB1,HLA-DQB2,HLA-DRA,HLA-DRB1,HLA-DRB3,HLA-DRB4,HLA-DRB5,HLA-F,HLA-H,CFI,JCHAIN,IL7R,IL13RA2,IL18,ITK,KLRC1,LAIR1,SH2D1A,MEF2C,PLA2G4A,PPP3CB,PRKCB,PTPRC,RAB27A,CCL19,SLAMF1,ZAP70,SKAP1,CD84,CLEC10A,RIPK3,RFTN1,SIT1,TBX2…
5_Member	GO Biological Processes	GO:0001914	regulation of T cell mediated cytotoxicity	-10.7202	-8.52359	15/39	911,912,913,2213,3071,3106,3122,3123,3134,3136,3575,3821,5532,5788,11035	CD1C,CD1D,CD1E,FCGR2B,NCKAP1L,HLA-B,HLA-DRA,HLA-DRB1,HLA-F,HLA-H,IL7R,KLRC1,PPP3CB,PTPRC,RIPK3
5_Member	GO Biological Processes	GO:0002456	T cell mediated immunity	-10.5598	-8.38402	24/111	911,912,913,925,2213,3071,3106,3122,3123,3125,3134,3136,3575,3606,3821,5532,5788,5873,6504,11035,23180,30009,56253,114548	CD1C,CD1D,CD1E,CD8A,FCGR2B,NCKAP1L,HLA-B,HLA-DRA,HLA-DRB1,HLA-DRB3,HLA-F,HLA-H,IL7R,IL18,KLRC1,PPP3CB,PTPRC,RAB27A,SLAMF1,RIPK3,RFTN1,TBX21,CRTAM,NLRP3
5_Member	GO Biological Processes	GO:0001909	leukocyte mediated cytotoxicity	-10.1901	-8.06087	25/125	911,912,913,1511,1524,2213,3071,3106,3122,3123,3134,3136,3575,3606,3684,3821,4068,5272,5532,5788,5873,8807,11035,56253,57823	CD1C,CD1D,CD1E,CTSG,CX3CR1,FCGR2B,NCKAP1L,HLA-B,HLA-DRA,HLA-DRB1,HLA-F,HLA-H,IL7R,IL18,ITGAM,KLRC1,SH2D1A,SERPINB9,PPP3CB,PTPRC,RAB27A,IL18RAP,RIPK3,CRTAM,SLAMF7
5_Member	GO Biological Processes	GO:0031341	regulation of cell killing	-9.71448	-7.62974	22/102	911,912,913,1524,2213,3071,3075,3106,3122,3123,3134,3136,3575,3684,3821,4068,5272,5532,5788,8807,11035,56253	CD1C,CD1D,CD1E,CX3CR1,FCGR2B,NCKAP1L,CFH,HLA-B,HLA-DRA,HLA-DRB1,HLA-F,HLA-H,IL7R,ITGAM,KLRC1,SH2D1A,SERPINB9,PPP3CB,PTPRC,IL18RAP,RIPK3,CRTAM
5_Member	GO Biological Processes	GO:0002709	regulation of T cell mediated immunity	-9.60964	-7.52957	20/85	911,912,913,2213,3071,3106,3122,3123,3125,3134,3136,3575,3606,3821,5532,5788,6504,11035,30009,114548	CD1C,CD1D,CD1E,FCGR2B,NCKAP1L,HLA-B,HLA-DRA,HLA-DRB1,HLA-DRB3,HLA-F,HLA-H,IL7R,IL18,KLRC1,PPP3CB,PTPRC,SLAMF1,RIPK3,TBX21,NLRP3
5_Member	GO Biological Processes	GO:0002819	regulation of adaptive immune response	-9.15598	-7.12004	29/183	301,695,911,912,913,940,962,2213,3071,3106,3122,3123,3125,3134,3136,3575,3606,3821,4208,5321,5532,5788,6363,6504,8631,11035,30009,64092,114548	ANXA1,BTK,CD1C,CD1D,CD1E,CD28,CD48,FCGR2B,NCKAP1L,HLA-B,HLA-DRA,HLA-DRB1,HLA-DRB3,HLA-F,HLA-H,IL7R,IL18,KLRC1,MEF2C,PLA2G4A,PPP3CB,PTPRC,CCL19,SLAMF1,SKAP1,RIPK3,TBX21,SAMSN1,NLRP3
5_Member	GO Biological Processes	GO:0002699	positive regulation of immune effector process	-8.93329	-6.88241	36/237	301,640,695,911,912,913,940,972,2294,3106,3122,3123,3125,3134,3136,3598,3606,3684,3815,4068,5336,5788,6363,6504,7494,7805,8807,8832,26191,30009,30817,54106,56253,84787,114548,117854	ANXA1,BLK,BTK,CD1C,CD1D,CD1E,CD28,CD74,FOXF1,HLA-B,HLA-DRA,HLA-DRB1,HLA-DRB3,HLA-F,HLA-H,IL13RA2,IL18,ITGAM,KIT,SH2D1A,PLCG2,PTPRC,CCL19,SLAMF1,XBP1,LAPTM5,IL18RAP,CD84,PTPN22,TBX21,ADGRE2,TLR9,CRTAM,KMT5C,NLRP3,TRIM6
5_Member	GO Biological Processes	GO:0002706	regulation of lymphocyte mediated immunity	-8.70931	-6.72101	27/168	695,911,912,913,940,2213,3071,3106,3122,3123,3125,3134,3136,3575,3606,3821,4068,5272,5532,5788,6504,8807,10225,11035,30009,56253,114548	BTK,CD1C,CD1D,CD1E,CD28,FCGR2B,NCKAP1L,HLA-B,HLA-DRA,HLA-DRB1,HLA-DRB3,HLA-F,HLA-H,IL7R,IL18,KLRC1,SH2D1A,SERPINB9,PPP3CB,PTPRC,SLAMF1,IL18RAP,CD96,RIPK3,TBX21,CRTAM,NLRP3
5_Member	GO Biological Processes	GO:0002822	regulation of adaptive immune response based on somatic recombination of immune receptors built from immunoglobulin superfamily domains	-8.05802	-6.13424	26/168	301,695,911,912,913,940,2213,3071,3106,3122,3123,3125,3134,3136,3575,3606,3821,4208,5321,5532,5788,6363,6504,11035,30009,114548	ANXA1,BTK,CD1C,CD1D,CD1E,CD28,FCGR2B,NCKAP1L,HLA-B,HLA-DRA,HLA-DRB1,HLA-DRB3,HLA-F,HLA-H,IL7R,IL18,KLRC1,MEF2C,PLA2G4A,PPP3CB,PTPRC,CCL19,SLAMF1,RIPK3,TBX21,NLRP3
5_Member	GO Biological Processes	GO:0001906	cell killing	-7.43534	-5.57897	27/192	911,912,913,1511,1524,2213,3071,3075,3106,3122,3123,3134,3136,3575,3606,3684,3821,4068,4069,5272,5532,5788,5873,8807,11035,56253,57823	CD1C,CD1D,CD1E,CTSG,CX3CR1,FCGR2B,NCKAP1L,CFH,HLA-B,HLA-DRA,HLA-DRB1,HLA-F,HLA-H,IL7R,IL18,ITGAM,KLRC1,SH2D1A,LYZ,SERPINB9,PPP3CB,PTPRC,RAB27A,IL18RAP,RIPK3,CRTAM,SLAMF7
5_Member	GO Biological Processes	GO:0019883	antigen processing and presentation of endogenous antigen	-7.33867	-5.49326	10/26	911,912,913,972,3106,3107,3122,3123,3134,3136	CD1C,CD1D,CD1E,CD74,HLA-B,HLA-C,HLA-DRA,HLA-DRB1,HLA-F,HLA-H
5_Member	GO Biological Processes	GO:0002705	positive regulation of leukocyte mediated immunity	-7.3332	-5.48914	22/135	695,911,912,913,940,3106,3122,3123,3125,3134,3136,3606,3684,3815,4068,5336,5788,6504,8807,30009,56253,114548	BTK,CD1C,CD1D,CD1E,CD28,HLA-B,HLA-DRA,HLA-DRB1,HLA-DRB3,HLA-F,HLA-H,IL18,ITGAM,KIT,SH2D1A,PLCG2,PTPRC,SLAMF1,IL18RAP,TBX21,CRTAM,NLRP3
5_Member	GO Biological Processes	GO:0002708	positive regulation of lymphocyte mediated immunity	-6.64238	-4.86029	19/113	695,911,912,913,940,3106,3122,3123,3125,3134,3136,3606,4068,5788,6504,8807,30009,56253,114548	BTK,CD1C,CD1D,CD1E,CD28,HLA-B,HLA-DRA,HLA-DRB1,HLA-DRB3,HLA-F,HLA-H,IL18,SH2D1A,PTPRC,SLAMF1,IL18RAP,TBX21,CRTAM,NLRP3
5_Member	GO Biological Processes	GO:0001912	positive regulation of leukocyte mediated cytotoxicity	-6.39634	-4.64212	13/56	911,912,913,3106,3122,3123,3134,3136,3684,4068,5788,8807,56253	CD1C,CD1D,CD1E,HLA-B,HLA-DRA,HLA-DRB1,HLA-F,HLA-H,ITGAM,SH2D1A,PTPRC,IL18RAP,CRTAM
5_Member	GO Biological Processes	GO:0002711	positive regulation of T cell mediated immunity	-6.39634	-4.64212	13/56	911,912,913,3106,3122,3123,3125,3134,3136,3606,5788,6504,114548	CD1C,CD1D,CD1E,HLA-B,HLA-DRA,HLA-DRB1,HLA-DRB3,HLA-F,HLA-H,IL18,PTPRC,SLAMF1,NLRP3
5_Member	GO Biological Processes	GO:0002821	positive regulation of adaptive immune response	-6.02796	-4.31863	18/112	695,911,912,913,940,3106,3122,3123,3125,3134,3136,3606,5321,5788,6504,8631,30009,114548	BTK,CD1C,CD1D,CD1E,CD28,HLA-B,HLA-DRA,HLA-DRB1,HLA-DRB3,HLA-F,HLA-H,IL18,PLA2G4A,PTPRC,SLAMF1,SKAP1,TBX21,NLRP3
5_Member	GO Biological Processes	GO:0031343	positive regulation of cell killing	-5.77105	-4.09766	13/63	911,912,913,3106,3122,3123,3134,3136,3684,4068,5788,8807,56253	CD1C,CD1D,CD1E,HLA-B,HLA-DRA,HLA-DRB1,HLA-F,HLA-H,ITGAM,SH2D1A,PTPRC,IL18RAP,CRTAM
5_Member	GO Biological Processes	GO:0001916	positive regulation of T cell mediated cytotoxicity	-5.74509	-4.07442	9/29	911,912,913,3106,3122,3123,3134,3136,5788	CD1C,CD1D,CD1E,HLA-B,HLA-DRA,HLA-DRB1,HLA-F,HLA-H,PTPRC
5_Member	GO Biological Processes	GO:0016064	immunoglobulin mediated immune response	-5.67558	-4.01915	25/207	695,715,716,730,930,939,940,972,1191,2213,3113,3115,3118,3119,3120,3122,3123,3125,3126,3127,3426,3598,5788,30009,100423062	BTK,C1R,C1S,C7,CD19,CD27,CD28,CD74,CLU,FCGR2B,HLA-DPA1,HLA-DPB1,HLA-DQA2,HLA-DQB1,HLA-DQB2,HLA-DRA,HLA-DRB1,HLA-DRB3,HLA-DRB4,HLA-DRB5,CFI,IL13RA2,PTPRC,TBX21,IGLL5
5_Member	GO Biological Processes	GO:0002824	positive regulation of adaptive immune response based on somatic recombination of immune receptors built from immunoglobulin superfamily domains	-5.65763	-4.00381	17/107	695,911,912,913,940,3106,3122,3123,3125,3134,3136,3606,5321,5788,6504,30009,114548	BTK,CD1C,CD1D,CD1E,CD28,HLA-B,HLA-DRA,HLA-DRB1,HLA-DRB3,HLA-F,HLA-H,IL18,PLA2G4A,PTPRC,SLAMF1,TBX21,NLRP3
5_Member	GO Biological Processes	GO:0019724	B cell mediated immunity	-5.56155	-3.92228	25/210	695,715,716,730,930,939,940,972,1191,2213,3113,3115,3118,3119,3120,3122,3123,3125,3126,3127,3426,3598,5788,30009,100423062	BTK,C1R,C1S,C7,CD19,CD27,CD28,CD74,CLU,FCGR2B,HLA-DPA1,HLA-DPB1,HLA-DQA2,HLA-DQB1,HLA-DQB2,HLA-DRA,HLA-DRB1,HLA-DRB3,HLA-DRB4,HLA-DRB5,CFI,IL13RA2,PTPRC,TBX21,IGLL5
6_Summary	GO Cellular Components	GO:0015629	actin cytoskeleton	-20.0626	-16.7521	80/508	59,60,70,72,199,283,301,558,800,1073,1266,1410,1809,2316,2533,2633,2934,3059,3611,4046,4629,4637,4638,4921,5239,5358,5579,5881,6525,6622,6840,7010,7111,7169,7205,7412,7414,7739,8572,9260,9262,9480,9499,9535,10253,10398,10580,10602,10603,10671,10699,10979,11034,11073,11155,11170,23022,23607,25802,25932,26166,27129,27145,27147,53405,55362,55742,55930,55971,79642,80206,83700,83992,84952,91624,92241,…	ACTA2,ACTB,ACTC1,ACTG2,AIF1,ANG,ANXA1,AXL,CALD1,CFL2,CNN3,CRYAB,DPYSL3,FLNA,FYB1,GBP1,GSN,HCLS1,ILK,LSP1,MYH11,MYL6,MYLK,DDR2,PGM5,PLS3,PRKCB,RAC3,SMTN,SNCA,SVIL,TEK,TMOD1,TPM2,TRIP6,VCAM1,VCL,ZNF185,PDLIM4,PDLIM7,STK17B,ONECUT2,MYOT,GMFG,SPRY2,MYL9,SORBS1,CDC42EP3,SH2B2,DCTN6,CORIN,FERMT2,DSTN,TOPBP1,LDB3,FAM107A,PALLD,CD2AP,LMOD1,CLIC4,RGS22,HSPB7,FILIP1,DENND2A,CLIC5,TMEM63B,PARVA,MYO5C,BAIAP2…
6_Member	GO Cellular Components	GO:0015629	actin cytoskeleton	-20.0626	-16.7521	80/508	59,60,70,72,199,283,301,558,800,1073,1266,1410,1809,2316,2533,2633,2934,3059,3611,4046,4629,4637,4638,4921,5239,5358,5579,5881,6525,6622,6840,7010,7111,7169,7205,7412,7414,7739,8572,9260,9262,9480,9499,9535,10253,10398,10580,10602,10603,10671,10699,10979,11034,11073,11155,11170,23022,23607,25802,25932,26166,27129,27145,27147,53405,55362,55742,55930,55971,79642,80206,83700,83992,84952,91624,92241,…	ACTA2,ACTB,ACTC1,ACTG2,AIF1,ANG,ANXA1,AXL,CALD1,CFL2,CNN3,CRYAB,DPYSL3,FLNA,FYB1,GBP1,GSN,HCLS1,ILK,LSP1,MYH11,MYL6,MYLK,DDR2,PGM5,PLS3,PRKCB,RAC3,SMTN,SNCA,SVIL,TEK,TMOD1,TPM2,TRIP6,VCAM1,VCL,ZNF185,PDLIM4,PDLIM7,STK17B,ONECUT2,MYOT,GMFG,SPRY2,MYL9,SORBS1,CDC42EP3,SH2B2,DCTN6,CORIN,FERMT2,DSTN,TOPBP1,LDB3,FAM107A,PALLD,CD2AP,LMOD1,CLIC4,RGS22,HSPB7,FILIP1,DENND2A,CLIC5,TMEM63B,PARVA,MYO5C,BAIAP2…
6_Member	GO Molecular Functions	GO:0003779	actin binding	-11.2422	-8.8989	58/442	199,283,309,800,1073,1234,1264,1266,2316,2318,2633,2934,3059,3778,4046,4629,4638,5358,6275,6525,6622,6840,6876,7111,7145,7169,7414,7739,8572,9172,9260,9499,9535,9749,10486,10580,10979,11034,11155,11170,23022,23136,23500,25802,51088,54221,55704,55742,55930,55971,80206,84168,85458,91624,92241,120892,130271,171024	AIF1,ANG,ANXA6,CALD1,CFL2,CCR5,CNN1,CNN3,FLNA,FLNC,GBP1,GSN,HCLS1,KCNMA1,LSP1,MYH11,MYLK,PLS3,S100A4,SMTN,SNCA,SVIL,TAGLN,TMOD1,TNS1,TPM2,VCL,ZNF185,PDLIM4,MYOM2,PDLIM7,MYOT,GMFG,PHACTR2,CAP2,SORBS1,FERMT2,DSTN,LDB3,FAM107A,PALLD,EPB41L3,DAAM2,LMOD1,KLHL5,SNTG2,CCDC88A,PARVA,MYO5C,BAIAP2L1,FHOD3,ANTXR1,DIXDC1,NEXN,RCSD1,LRRK2,PLEKHH2,SYNPO2
6_Member	GO Molecular Functions	GO:0051015	actin filament binding	-3.1286	-1.83053	22/214	199,309,1073,2316,2318,2934,3059,4629,5358,6840,6876,7111,7169,7739,9172,10979,11034,55930,80206,84168,91624,92241	AIF1,ANXA6,CFL2,FLNA,FLNC,GSN,HCLS1,MYH11,PLS3,SVIL,TAGLN,TMOD1,TPM2,ZNF185,MYOM2,FERMT2,DSTN,MYO5C,FHOD3,ANTXR1,NEXN,RCSD1
7_Summary	GO Cellular Components	GO:0043292	contractile fiber	-19.5246	-16.3188	52/238	59,70,493,800,801,805,845,1073,1410,1465,1674,2274,2316,2318,3611,3764,4313,4629,4660,5239,5532,6263,6546,6840,7111,7169,7414,7913,8572,9172,9260,9499,9722,10060,10398,10979,11155,23022,23336,25802,55742,57158,80206,81493,84676,91624,114907,171024,255743,283807,339855,100820829	ACTA2,ACTC1,ATP2B4,CALD1,CALM1,CALM2,CASQ2,CFL2,CRYAB,CSRP1,DES,FHL2,FLNA,FLNC,ILK,KCNJ8,MMP2,MYH11,PPP1R12B,PGM5,PPP3CB,RYR3,SLC8A1,SVIL,TMOD1,TPM2,VCL,DEK,PDLIM4,MYOM2,PDLIM7,MYOT,NOS1AP,ABCC9,MYL9,FERMT2,LDB3,PALLD,SYNM,LMOD1,PARVA,JPH2,FHOD3,SYNC,TRIM63,NEXN,FBXO32,SYNPO2,NPNT,FBXL22,KY,MYZAP
7_Member	GO Cellular Components	GO:0043292	contractile fiber	-19.5246	-16.3188	52/238	59,70,493,800,801,805,845,1073,1410,1465,1674,2274,2316,2318,3611,3764,4313,4629,4660,5239,5532,6263,6546,6840,7111,7169,7414,7913,8572,9172,9260,9499,9722,10060,10398,10979,11155,23022,23336,25802,55742,57158,80206,81493,84676,91624,114907,171024,255743,283807,339855,100820829	ACTA2,ACTC1,ATP2B4,CALD1,CALM1,CALM2,CASQ2,CFL2,CRYAB,CSRP1,DES,FHL2,FLNA,FLNC,ILK,KCNJ8,MMP2,MYH11,PPP1R12B,PGM5,PPP3CB,RYR3,SLC8A1,SVIL,TMOD1,TPM2,VCL,DEK,PDLIM4,MYOM2,PDLIM7,MYOT,NOS1AP,ABCC9,MYL9,FERMT2,LDB3,PALLD,SYNM,LMOD1,PARVA,JPH2,FHOD3,SYNC,TRIM63,NEXN,FBXO32,SYNPO2,NPNT,FBXL22,KY,MYZAP
7_Member	GO Cellular Components	GO:0030016	myofibril	-17.2093	-14.2192	48/230	70,493,800,801,805,845,1073,1410,1465,1674,2274,2316,2318,3611,3764,4313,4660,5239,5532,6263,6546,6840,7111,7169,7414,8572,9172,9260,9499,9722,10060,10398,10979,11155,23022,23336,25802,55742,57158,80206,81493,84676,91624,114907,171024,283807,339855,100820829	ACTC1,ATP2B4,CALD1,CALM1,CALM2,CASQ2,CFL2,CRYAB,CSRP1,DES,FHL2,FLNA,FLNC,ILK,KCNJ8,MMP2,PPP1R12B,PGM5,PPP3CB,RYR3,SLC8A1,SVIL,TMOD1,TPM2,VCL,PDLIM4,MYOM2,PDLIM7,MYOT,NOS1AP,ABCC9,MYL9,FERMT2,LDB3,PALLD,SYNM,LMOD1,PARVA,JPH2,FHOD3,SYNC,TRIM63,NEXN,FBXO32,SYNPO2,FBXL22,KY,MYZAP
7_Member	GO Cellular Components	GO:0030017	sarcomere	-15.1696	-12.374	43/210	70,493,801,805,845,1073,1410,1465,1674,2274,2316,2318,3611,4313,4660,5239,5532,6263,6546,7111,7169,8572,9172,9260,9499,9722,10060,10398,10979,11155,23022,25802,55742,57158,80206,81493,84676,91624,114907,171024,283807,339855,100820829	ACTC1,ATP2B4,CALM1,CALM2,CASQ2,CFL2,CRYAB,CSRP1,DES,FHL2,FLNA,FLNC,ILK,MMP2,PPP1R12B,PGM5,PPP3CB,RYR3,SLC8A1,TMOD1,TPM2,PDLIM4,MYOM2,PDLIM7,MYOT,NOS1AP,ABCC9,MYL9,FERMT2,LDB3,PALLD,LMOD1,PARVA,JPH2,FHOD3,SYNC,TRIM63,NEXN,FBXO32,SYNPO2,FBXL22,KY,MYZAP
7_Member	GO Cellular Components	GO:0031674	I band	-14.4487	-11.7302	34/140	70,493,845,1073,1410,1465,1674,2274,2316,2318,4660,5239,5532,6263,6546,8572,9260,9499,9722,10398,10979,11155,23022,55742,57158,80206,81493,84676,91624,114907,171024,283807,339855,100820829	ACTC1,ATP2B4,CASQ2,CFL2,CRYAB,CSRP1,DES,FHL2,FLNA,FLNC,PPP1R12B,PGM5,PPP3CB,RYR3,SLC8A1,PDLIM4,PDLIM7,MYOT,NOS1AP,MYL9,FERMT2,LDB3,PALLD,PARVA,JPH2,FHOD3,SYNC,TRIM63,NEXN,FBXO32,SYNPO2,FBXL22,KY,MYZAP
7_Member	GO Cellular Components	GO:0030018	Z disc	-13.9283	-11.4153	30/129	493,845,1410,1465,1674,2274,2316,2318,4660,5239,5532,6263,6546,8572,9260,9499,10398,11155,23022,55742,57158,80206,81493,84676,91624,114907,171024,283807,339855,100820829	ATP2B4,CASQ2,CRYAB,CSRP1,DES,FHL2,FLNA,FLNC,PPP1R12B,PGM5,PPP3CB,RYR3,SLC8A1,PDLIM4,PDLIM7,MYOT,MYL9,LDB3,PALLD,PARVA,JPH2,FHOD3,SYNC,TRIM63,NEXN,FBXO32,SYNPO2,FBXL22,KY,MYZAP
8_Summary	GO Biological Processes	GO:0006936	muscle contraction	-19.476	-16.3793	59/347	59,70,309,384,477,488,493,781,800,801,845,857,952,1160,1264,1410,1490,1674,1909,2316,2697,2934,2946,3764,3778,3815,4629,4637,4638,4660,5023,5348,5350,5592,5743,6327,6332,6442,6525,6546,6769,7111,7169,7349,7871,8082,9172,9499,10316,10398,23213,23336,25802,26509,84676,92241,124093,255743,406922,199,2628,3479,3600,4653,29995,114907,128,290,805,947,1285,1359,1511,2296,2313,2621,3212,3398,3627,3670,37…	ACTA2,ACTC1,ANXA6,ARG2,ATP1A2,ATP2A2,ATP2B4,CACNA2D1,CALD1,CALM1,CASQ2,CAV1,CD38,CKMT2,CNN1,CRYAB,CCN2,DES,EDNRA,FLNA,GJA1,GSN,GSTM2,KCNJ8,KCNMA1,KIT,MYH11,MYL6,MYLK,PPP1R12B,P2RX1,FXYD1,PLN,PRKG1,PTGS2,SCN2B,SCN7A,SGCA,SMTN,SLC8A1,STAC,TMOD1,TPM2,UCN,SLMAP,SSPN,MYOM2,MYOT,NMUR1,MYL9,SULF1,SYNM,LMOD1,MYOF,TRIM63,RCSD1,CCDC78,NPNT,MIR133A1,AIF1,GATM,IGF1,IL15,MYOC,LMCD1,FBXO32,ADH5,ANPEP,CALM2,CD3…
8_Member	GO Biological Processes	GO:0006936	muscle contraction	-19.476	-16.3793	59/347	59,70,309,384,477,488,493,781,800,801,845,857,952,1160,1264,1410,1490,1674,1909,2316,2697,2934,2946,3764,3778,3815,4629,4637,4638,4660,5023,5348,5350,5592,5743,6327,6332,6442,6525,6546,6769,7111,7169,7349,7871,8082,9172,9499,10316,10398,23213,23336,25802,26509,84676,92241,124093,255743,406922	ACTA2,ACTC1,ANXA6,ARG2,ATP1A2,ATP2A2,ATP2B4,CACNA2D1,CALD1,CALM1,CASQ2,CAV1,CD38,CKMT2,CNN1,CRYAB,CCN2,DES,EDNRA,FLNA,GJA1,GSN,GSTM2,KCNJ8,KCNMA1,KIT,MYH11,MYL6,MYLK,PPP1R12B,P2RX1,FXYD1,PLN,PRKG1,PTGS2,SCN2B,SCN7A,SGCA,SMTN,SLC8A1,STAC,TMOD1,TPM2,UCN,SLMAP,SSPN,MYOM2,MYOT,NMUR1,MYL9,SULF1,SYNM,LMOD1,MYOF,TRIM63,RCSD1,CCDC78,NPNT,MIR133A1
8_Member	GO Biological Processes	GO:0003012	muscle system process	-18.0983	-15.1081	66/452	59,70,199,309,384,477,488,493,781,800,801,845,857,952,1160,1264,1410,1490,1674,1909,2316,2628,2697,2934,2946,3479,3600,3764,3778,3815,4629,4637,4638,4653,4660,5023,5348,5350,5592,5743,6327,6332,6442,6525,6546,6769,7111,7169,7349,7871,8082,9172,9499,10316,10398,23213,23336,25802,26509,29995,84676,92241,114907,124093,255743,406922	ACTA2,ACTC1,AIF1,ANXA6,ARG2,ATP1A2,ATP2A2,ATP2B4,CACNA2D1,CALD1,CALM1,CASQ2,CAV1,CD38,CKMT2,CNN1,CRYAB,CCN2,DES,EDNRA,FLNA,GATM,GJA1,GSN,GSTM2,IGF1,IL15,KCNJ8,KCNMA1,KIT,MYH11,MYL6,MYLK,MYOC,PPP1R12B,P2RX1,FXYD1,PLN,PRKG1,PTGS2,SCN2B,SCN7A,SGCA,SMTN,SLC8A1,STAC,TMOD1,TPM2,UCN,SLMAP,SSPN,MYOM2,MYOT,NMUR1,MYL9,SULF1,SYNM,LMOD1,MYOF,LMCD1,TRIM63,RCSD1,FBXO32,CCDC78,NPNT,MIR133A1
8_Member	GO Biological Processes	GO:0003013	circulatory system process	-16.7953	-13.8236	82/598	59,70,128,290,477,488,493,781,801,805,845,857,947,952,1285,1359,1490,1511,1674,1909,2296,2313,2316,2621,2697,2934,2946,3212,3398,3627,3670,3764,3778,3779,4041,4311,5023,5125,5243,5348,5350,5592,5732,5743,5919,6327,6387,6445,6474,6517,6526,6546,6548,6558,6565,6567,6581,6901,6910,7010,7220,7349,9353,9429,9722,10060,10371,10659,10699,10979,23576,26509,27129,28232,55328,57419,64091,84525,91608,121643…	ACTA2,ACTC1,ADH5,ANPEP,ATP1A2,ATP2A2,ATP2B4,CACNA2D1,CALM1,CALM2,CASQ2,CAV1,CD34,CD38,COL4A3,CPA3,CCN2,CTSG,DES,EDNRA,FOXC1,FLI1,FLNA,GAS6,GJA1,GSN,GSTM2,HOXB2,ID2,CXCL10,ISL1,KCNJ8,KCNMA1,KCNMB1,LRP5,MME,P2RX1,PCSK5,ABCB1,FXYD1,PLN,PRKG1,PTGER2,PTGS2,RARRES2,SCN2B,CXCL12,SGCG,SHOX2,SLC2A4,SLC5A3,SLC8A1,SLC9A1,SLC12A2,SLC15A2,SLC16A2,SLC22A3,TAFAZZIN,TBX5,TEK,TRPC1,UCN,SLIT2,ABCG2,NOS1AP,ABCC9,SE…
8_Member	GO Biological Processes	GO:0008015	blood circulation	-15.3436	-12.5332	72/513	59,70,128,290,477,488,493,781,801,805,845,857,947,952,1285,1359,1490,1511,1674,1909,2296,2313,2316,2621,2697,2934,2946,3212,3398,3627,3670,3764,3778,3779,4041,4311,5023,5125,5348,5350,5592,5732,5743,5919,6327,6387,6445,6474,6546,6548,6901,6910,7010,7220,7349,9353,9722,10060,10371,10659,10699,10979,23576,26509,27129,55328,64091,84525,91608,121643,349149,406922	ACTA2,ACTC1,ADH5,ANPEP,ATP1A2,ATP2A2,ATP2B4,CACNA2D1,CALM1,CALM2,CASQ2,CAV1,CD34,CD38,COL4A3,CPA3,CCN2,CTSG,DES,EDNRA,FOXC1,FLI1,FLNA,GAS6,GJA1,GSN,GSTM2,HOXB2,ID2,CXCL10,ISL1,KCNJ8,KCNMA1,KCNMB1,LRP5,MME,P2RX1,PCSK5,FXYD1,PLN,PRKG1,PTGER2,PTGS2,RARRES2,SCN2B,CXCL12,SGCG,SHOX2,SLC8A1,SLC9A1,TAFAZZIN,TBX5,TEK,TRPC1,UCN,SLIT2,NOS1AP,ABCC9,SEMA3A,CELF2,CORIN,FERMT2,DDAH1,MYOF,HSPB7,RNLS,POPDC2,HOPX,…
8_Member	GO Biological Processes	GO:0060047	heart contraction	-11.0087	-8.68619	40/242	70,477,488,493,781,801,805,845,857,1490,1674,2316,2697,2934,2946,3670,3764,5348,5350,6327,6445,6474,6546,6548,6901,6910,7220,7349,9722,10060,10371,10659,10699,27129,55328,64091,84525,121643,349149,406922	ACTC1,ATP1A2,ATP2A2,ATP2B4,CACNA2D1,CALM1,CALM2,CASQ2,CAV1,CCN2,DES,FLNA,GJA1,GSN,GSTM2,ISL1,KCNJ8,FXYD1,PLN,SCN2B,SGCG,SHOX2,SLC8A1,SLC9A1,TAFAZZIN,TBX5,TRPC1,UCN,NOS1AP,ABCC9,SEMA3A,CELF2,CORIN,HSPB7,RNLS,POPDC2,HOPX,FOXN4,GJC3,MIR133A1
8_Member	GO Biological Processes	GO:0003015	heart process	-10.447	-8.18497	40/252	70,477,488,493,781,801,805,845,857,1490,1674,2316,2697,2934,2946,3670,3764,5348,5350,6327,6445,6474,6546,6548,6901,6910,7220,7349,9722,10060,10371,10659,10699,27129,55328,64091,84525,121643,349149,406922	ACTC1,ATP1A2,ATP2A2,ATP2B4,CACNA2D1,CALM1,CALM2,CASQ2,CAV1,CCN2,DES,FLNA,GJA1,GSN,GSTM2,ISL1,KCNJ8,FXYD1,PLN,SCN2B,SGCG,SHOX2,SLC8A1,SLC9A1,TAFAZZIN,TBX5,TRPC1,UCN,NOS1AP,ABCC9,SEMA3A,CELF2,CORIN,HSPB7,RNLS,POPDC2,HOPX,FOXN4,GJC3,MIR133A1
8_Member	GO Biological Processes	GO:0008016	regulation of heart contraction	-9.99874	-7.81415	35/207	477,488,493,781,801,805,845,857,1490,1674,2316,2697,2946,3670,5348,5350,6327,6474,6546,6548,6910,7220,7349,9722,10060,10371,10659,10699,27129,55328,64091,84525,121643,349149,406922	ATP1A2,ATP2A2,ATP2B4,CACNA2D1,CALM1,CALM2,CASQ2,CAV1,CCN2,DES,FLNA,GJA1,GSTM2,ISL1,FXYD1,PLN,SCN2B,SHOX2,SLC8A1,SLC9A1,TBX5,TRPC1,UCN,NOS1AP,ABCC9,SEMA3A,CELF2,CORIN,HSPB7,RNLS,POPDC2,HOPX,FOXN4,GJC3,MIR133A1
8_Member	GO Biological Processes	GO:0044057	regulation of system process	-9.85393	-7.75487	60/581	55,199,309,477,488,493,781,801,845,857,952,1264,1490,1674,2316,2621,2697,2946,3082,3479,3670,3778,3815,4660,5023,5348,5350,5592,5732,5743,6285,6327,6442,6474,6546,6910,7349,8530,9699,10060,10371,10398,10659,10699,27129,29995,54413,55328,57616,58494,64091,84525,84676,114907,120892,121643,151647,255743,349149,406922	ACP3,AIF1,ANXA6,ATP1A2,ATP2A2,ATP2B4,CACNA2D1,CALM1,CASQ2,CAV1,CD38,CNN1,CCN2,DES,FLNA,GAS6,GJA1,GSTM2,HGF,IGF1,ISL1,KCNMA1,KIT,PPP1R12B,P2RX1,FXYD1,PLN,PRKG1,PTGER2,PTGS2,S100B,SCN2B,SGCA,SHOX2,SLC8A1,TBX5,UCN,CST7,RIMS2,ABCC9,SEMA3A,MYL9,CELF2,CORIN,HSPB7,LMCD1,NLGN3,RNLS,TSHZ3,JAM2,POPDC2,HOPX,TRIM63,FBXO32,LRRK2,FOXN4,TAFA4,NPNT,GJC3,MIR133A1
8_Member	GO Biological Processes	GO:1903522	regulation of blood circulation	-9.60754	-7.46514	39/257	477,488,493,781,801,805,845,857,952,1490,1674,2316,2697,2946,3670,5023,5348,5350,5732,5743,6327,6474,6546,6548,6910,7220,7349,9722,10060,10371,10659,10699,27129,55328,64091,84525,121643,349149,406922	ATP1A2,ATP2A2,ATP2B4,CACNA2D1,CALM1,CALM2,CASQ2,CAV1,CD38,CCN2,DES,FLNA,GJA1,GSTM2,ISL1,P2RX1,FXYD1,PLN,PTGER2,PTGS2,SCN2B,SHOX2,SLC8A1,SLC9A1,TBX5,TRPC1,UCN,NOS1AP,ABCC9,SEMA3A,CELF2,CORIN,HSPB7,RNLS,POPDC2,HOPX,FOXN4,GJC3,MIR133A1
8_Member	GO Biological Processes	GO:0061337	cardiac conduction	-7.31886	-5.44116	20/99	477,488,493,781,801,805,845,857,2316,2697,3670,5350,6327,6546,6548,6910,7220,10060,10699,349149	ATP1A2,ATP2A2,ATP2B4,CACNA2D1,CALM1,CALM2,CASQ2,CAV1,FLNA,GJA1,ISL1,PLN,SCN2B,SLC8A1,SLC9A1,TBX5,TRPC1,ABCC9,CORIN,GJC3
8_Member	GO Biological Processes	GO:0006941	striated muscle contraction	-6.80784	-4.99123	27/179	70,384,477,488,781,801,805,845,857,1490,2316,2697,2934,2946,3764,5350,6327,6546,6548,6769,6901,7349,9722,23336,92241,124093,406922	ACTC1,ARG2,ATP1A2,ATP2A2,CACNA2D1,CALM1,CALM2,CASQ2,CAV1,CCN2,FLNA,GJA1,GSN,GSTM2,KCNJ8,PLN,SCN2B,SLC8A1,SLC9A1,STAC,TAFAZZIN,UCN,NOS1AP,SYNM,RCSD1,CCDC78,MIR133A1
8_Member	GO Biological Processes	GO:0060048	cardiac muscle contraction	-6.14078	-4.39202	22/137	70,477,488,781,801,805,845,857,1490,2316,2697,2934,2946,3764,5350,6327,6546,6548,6901,7349,9722,406922	ACTC1,ATP1A2,ATP2A2,CACNA2D1,CALM1,CALM2,CASQ2,CAV1,CCN2,FLNA,GJA1,GSN,GSTM2,KCNJ8,PLN,SCN2B,SLC8A1,SLC9A1,TAFAZZIN,UCN,NOS1AP,MIR133A1
8_Member	GO Biological Processes	GO:0090257	regulation of muscle system process	-5.55217	-3.91375	28/252	199,309,477,488,493,801,845,857,1264,1490,2946,3479,3778,3815,4660,5023,5350,5592,5743,6442,6546,7349,10398,29995,84676,114907,255743,406922	AIF1,ANXA6,ATP1A2,ATP2A2,ATP2B4,CALM1,CASQ2,CAV1,CNN1,CCN2,GSTM2,IGF1,KCNMA1,KIT,PPP1R12B,P2RX1,PLN,PRKG1,PTGS2,SGCA,SLC8A1,UCN,MYL9,LMCD1,TRIM63,FBXO32,NPNT,MIR133A1
8_Member	GO Biological Processes	GO:0035637	multicellular organismal signaling	-5.48427	-3.82078	23/161	477,488,493,781,801,805,845,857,2316,2697,3670,5023,5350,6327,6332,6546,6548,6910,7220,10060,10699,83700,349149	ATP1A2,ATP2A2,ATP2B4,CACNA2D1,CALM1,CALM2,CASQ2,CAV1,FLNA,GJA1,ISL1,P2RX1,PLN,SCN2B,SCN7A,SLC8A1,SLC9A1,TBX5,TRPC1,ABCC9,CORIN,JAM3,GJC3
8_Member	GO Biological Processes	GO:0042391	regulation of membrane potential	-5.46705	-3.8071	44/434	477,488,781,801,834,845,857,1634,2273,2316,2697,2743,3745,3764,3778,4208,4355,4653,5023,5348,5350,5764,6327,6332,6546,6548,6622,6910,7871,9630,9699,9722,10550,23111,54413,54532,55022,57657,64091,120892,151647,401190,406922,642938	ATP1A2,ATP2A2,CACNA2D1,CALM1,CASP1,CASQ2,CAV1,DCN,FHL1,FLNA,GJA1,GLRB,KCNB1,KCNJ8,KCNMA1,MEF2C,MPP2,MYOC,P2RX1,FXYD1,PLN,PTN,SCN2B,SCN7A,SLC8A1,SLC9A1,SNCA,TBX5,SLMAP,GNA14,RIMS2,NOS1AP,ARL6IP5,SPART,NLGN3,USP53,PID1,HCN3,POPDC2,LRRK2,TAFA4,RGS7BP,MIR133A1,INSYN2A
8_Member	GO Biological Processes	GO:0070252	actin-mediated cell contraction	-5.41869	-3.76748	17/97	70,477,488,781,857,2316,2697,2934,3764,4637,5350,6327,6548,9722,10630,55742,406922	ACTC1,ATP1A2,ATP2A2,CACNA2D1,CAV1,FLNA,GJA1,GSN,KCNJ8,MYL6,PLN,SCN2B,SLC9A1,NOS1AP,PDPN,PARVA,MIR133A1
8_Member	GO Biological Processes	GO:0006937	regulation of muscle contraction	-5.12478	-3.51717	23/169	309,477,488,801,805,845,857,1264,1490,2946,3778,3815,4660,5023,5350,5592,5743,6546,6548,7349,10398,255743,406922	ANXA6,ATP1A2,ATP2A2,CALM1,CALM2,CASQ2,CAV1,CNN1,CCN2,GSTM2,KCNMA1,KIT,PPP1R12B,P2RX1,PLN,PRKG1,PTGS2,SLC8A1,SLC9A1,UCN,MYL9,NPNT,MIR133A1
8_Member	GO Biological Processes	GO:0001508	action potential	-4.59587	-3.07003	19/134	477,488,781,801,857,2316,2697,3745,3764,5023,6327,6332,6546,6548,7871,9630,9722,54532,406922	ATP1A2,ATP2A2,CACNA2D1,CALM1,CAV1,FLNA,GJA1,KCNB1,KCNJ8,P2RX1,SCN2B,SCN7A,SLC8A1,SLC9A1,SLMAP,GNA14,NOS1AP,USP53,MIR133A1
8_Member	GO Biological Processes	GO:0030048	actin filament-based movement	-4.38453	-2.88692	18/127	70,477,488,781,857,2316,2697,2934,3764,4637,5350,6327,6548,9722,10630,55742,55930,406922	ACTC1,ATP1A2,ATP2A2,CACNA2D1,CAV1,FLNA,GJA1,GSN,KCNJ8,MYL6,PLN,SCN2B,SLC9A1,NOS1AP,PDPN,PARVA,MYO5C,MIR133A1
8_Member	GO Biological Processes	GO:0086003	cardiac muscle cell contraction	-4.3634	-2.86751	13/73	477,488,781,857,2316,2697,2934,3764,5350,6327,6548,9722,406922	ATP1A2,ATP2A2,CACNA2D1,CAV1,FLNA,GJA1,GSN,KCNJ8,PLN,SCN2B,SLC9A1,NOS1AP,MIR133A1
8_Member	GO Biological Processes	GO:0098903	regulation of membrane repolarization during action potential	-4.26619	-2.78351	5/10	781,857,2316,9722,406922	CACNA2D1,CAV1,FLNA,NOS1AP,MIR133A1
8_Member	GO Biological Processes	GO:0086001	cardiac muscle cell action potential	-4.17378	-2.70893	13/76	477,488,781,801,857,2316,2697,3764,6327,6546,7871,9722,406922	ATP1A2,ATP2A2,CACNA2D1,CALM1,CAV1,FLNA,GJA1,KCNJ8,SCN2B,SLC8A1,SLMAP,NOS1AP,MIR133A1
8_Member	GO Biological Processes	GO:0002027	regulation of heart rate	-3.8896	-2.46864	15/103	488,781,801,805,845,857,3670,5350,6327,6474,6546,9722,10371,55328,64091	ATP2A2,CACNA2D1,CALM1,CALM2,CASQ2,CAV1,ISL1,PLN,SCN2B,SHOX2,SLC8A1,NOS1AP,SEMA3A,RNLS,POPDC2
8_Member	GO Biological Processes	GO:0098900	regulation of action potential	-2.91823	-1.66703	9/55	488,781,801,857,2316,3745,6548,9722,406922	ATP2A2,CACNA2D1,CALM1,CAV1,FLNA,KCNB1,SLC9A1,NOS1AP,MIR133A1
8_Member	GO Biological Processes	GO:0086011	membrane repolarization during action potential	-2.71849	-1.50488	6/28	781,857,2316,3764,9722,406922	CACNA2D1,CAV1,FLNA,KCNJ8,NOS1AP,MIR133A1
8_Member	GO Biological Processes	GO:0086009	membrane repolarization	-2.64474	-1.45119	8/49	477,781,845,857,2316,3764,9722,406922	ATP1A2,CACNA2D1,CASQ2,CAV1,FLNA,KCNJ8,NOS1AP,MIR133A1
8_Member	GO Biological Processes	GO:0086002	cardiac muscle cell action potential involved in contraction	-2.37403	-1.22269	8/54	781,857,2316,2697,3764,6327,9722,406922	CACNA2D1,CAV1,FLNA,GJA1,KCNJ8,SCN2B,NOS1AP,MIR133A1
9_Summary	GO Cellular Components	GO:0098552	side of membrane	-19.1753	-16.1244	82/630	214,290,301,356,488,640,911,912,913,914,915,917,925,929,930,931,939,940,945,947,969,972,1234,1236,1438,1513,1524,1946,2044,2213,2350,2674,2791,3106,3107,3113,3115,3118,3119,3120,3122,3123,3125,3126,3127,3134,3136,3560,3575,3598,3627,3684,3815,4065,4162,4283,4907,5023,5239,5243,5788,6277,6387,6403,6504,6517,6769,7049,7412,7535,7881,9429,9630,10663,26191,54331,64926,79054,84168,120892,100423062,100…	ALCAM,ANPEP,ANXA1,FASLG,ATP2A2,BLK,CD1C,CD1D,CD1E,CD2,CD3D,CD3G,CD8A,CD14,CD19,MS4A1,CD27,CD28,CD33,CD34,CD69,CD74,CCR5,CCR7,CSF2RA,CTSK,CX3CR1,EFNA5,EPHA5,FCGR2B,FOLR2,GFRA1,GNG11,HLA-B,HLA-C,HLA-DPA1,HLA-DPB1,HLA-DQA2,HLA-DQB1,HLA-DQB2,HLA-DRA,HLA-DRB1,HLA-DRB3,HLA-DRB4,HLA-DRB5,HLA-F,HLA-H,IL2RB,IL7R,IL13RA2,CXCL10,ITGAM,KIT,LY75,MCAM,CXCL9,NT5E,P2RX1,PGM5,ABCB1,PTPRC,S100A6,CXCL12,SELP,SLAMF1…
9_Member	GO Cellular Components	GO:0098552	side of membrane	-19.1753	-16.1244	82/630	214,290,301,356,488,640,911,912,913,914,915,917,925,929,930,931,939,940,945,947,969,972,1234,1236,1438,1513,1524,1946,2044,2213,2350,2674,2791,3106,3107,3113,3115,3118,3119,3120,3122,3123,3125,3126,3127,3134,3136,3560,3575,3598,3627,3684,3815,4065,4162,4283,4907,5023,5239,5243,5788,6277,6387,6403,6504,6517,6769,7049,7412,7535,7881,9429,9630,10663,26191,54331,64926,79054,84168,120892,100423062,100…	ALCAM,ANPEP,ANXA1,FASLG,ATP2A2,BLK,CD1C,CD1D,CD1E,CD2,CD3D,CD3G,CD8A,CD14,CD19,MS4A1,CD27,CD28,CD33,CD34,CD69,CD74,CCR5,CCR7,CSF2RA,CTSK,CX3CR1,EFNA5,EPHA5,FCGR2B,FOLR2,GFRA1,GNG11,HLA-B,HLA-C,HLA-DPA1,HLA-DPB1,HLA-DQA2,HLA-DQB1,HLA-DQB2,HLA-DRA,HLA-DRB1,HLA-DRB3,HLA-DRB4,HLA-DRB5,HLA-F,HLA-H,IL2RB,IL7R,IL13RA2,CXCL10,ITGAM,KIT,LY75,MCAM,CXCL9,NT5E,P2RX1,PGM5,ABCB1,PTPRC,S100A6,CXCL12,SELP,SLAMF1…
9_Member	GO Cellular Components	GO:0009897	external side of plasma membrane	-14.5026	-11.9141	57/415	214,290,301,356,911,912,913,914,915,917,925,929,930,931,939,940,945,947,969,972,1234,1236,1438,1513,1524,1946,2044,2213,2350,2674,3123,3134,3136,3560,3575,3598,3627,3684,3815,4065,4162,4283,4907,5023,5243,5788,6387,6403,6504,6517,7049,7412,9429,10663,79054,84168,100423062	ALCAM,ANPEP,ANXA1,FASLG,CD1C,CD1D,CD1E,CD2,CD3D,CD3G,CD8A,CD14,CD19,MS4A1,CD27,CD28,CD33,CD34,CD69,CD74,CCR5,CCR7,CSF2RA,CTSK,CX3CR1,EFNA5,EPHA5,FCGR2B,FOLR2,GFRA1,HLA-DRB1,HLA-F,HLA-H,IL2RB,IL7R,IL13RA2,CXCL10,ITGAM,KIT,LY75,MCAM,CXCL9,NT5E,P2RX1,ABCB1,PTPRC,CXCL12,SELP,SLAMF1,SLC2A4,TGFBR3,VCAM1,ABCG2,CXCR6,TRPM8,ANTXR1,IGLL5
10_Summary	GO Biological Processes	GO:0061061	muscle structure development	-17.2774	-14.3405	79/636	70,488,577,652,857,963,1410,1465,1634,2273,2274,2294,2296,2318,3131,3235,3236,3398,3479,3606,3611,3627,3670,3679,3815,3908,3956,4208,4283,4629,4637,4638,5239,5915,6285,6442,6445,6474,6525,6546,6840,6876,6910,6943,7049,7111,7881,8324,8572,8910,9172,9215,9260,10290,10791,11096,11155,25802,25928,26509,30846,51676,54715,57158,58494,64091,80206,81029,84525,84814,91653,93166,116173,140578,221662,255743…	ACTC1,ATP2A2,ADGRB3,BMP4,CAV1,CD53,CRYAB,CSRP1,DCN,FHL1,FHL2,FOXF1,FOXC1,FLNC,HLF,HOXD9,HOXD10,ID2,IGF1,IL18,ILK,CXCL10,ISL1,ITGA7,KIT,LAMA2,LGALS1,MEF2C,CXCL9,MYH11,MYL6,MYLK,PGM5,RARB,S100B,SGCA,SGCG,SHOX2,SMTN,SLC8A1,SVIL,TAGLN,TBX5,TCF21,TGFBR3,TMOD1,KCNAB1,FZD7,PDLIM4,SGCE,MYOM2,LARGE1,PDLIM7,SPEG,VAMP5,ADAMTS5,LDB3,LMOD1,SOSTDC1,MYOF,EHD2,ASB2,RBFOX1,JPH2,JAM2,POPDC2,FHOD3,WNT5B,HOPX,PLPP7,…
10_Member	GO Biological Processes	GO:0061061	muscle structure development	-17.2774	-14.3405	79/636	70,488,577,652,857,963,1410,1465,1634,2273,2274,2294,2296,2318,3131,3235,3236,3398,3479,3606,3611,3627,3670,3679,3815,3908,3956,4208,4283,4629,4637,4638,5239,5915,6285,6442,6445,6474,6525,6546,6840,6876,6910,6943,7049,7111,7881,8324,8572,8910,9172,9215,9260,10290,10791,11096,11155,25802,25928,26509,30846,51676,54715,57158,58494,64091,80206,81029,84525,84814,91653,93166,116173,140578,221662,255743…	ACTC1,ATP2A2,ADGRB3,BMP4,CAV1,CD53,CRYAB,CSRP1,DCN,FHL1,FHL2,FOXF1,FOXC1,FLNC,HLF,HOXD9,HOXD10,ID2,IGF1,IL18,ILK,CXCL10,ISL1,ITGA7,KIT,LAMA2,LGALS1,MEF2C,CXCL9,MYH11,MYL6,MYLK,PGM5,RARB,S100B,SGCA,SGCG,SHOX2,SMTN,SLC8A1,SVIL,TAGLN,TBX5,TCF21,TGFBR3,TMOD1,KCNAB1,FZD7,PDLIM4,SGCE,MYOM2,LARGE1,PDLIM7,SPEG,VAMP5,ADAMTS5,LDB3,LMOD1,SOSTDC1,MYOF,EHD2,ASB2,RBFOX1,JPH2,JAM2,POPDC2,FHOD3,WNT5B,HOPX,PLPP7,…
10_Member	GO Biological Processes	GO:0007517	muscle organ development	-8.8421	-6.83261	40/327	70,652,857,1410,1634,2273,2296,3131,3235,3236,3479,3627,3670,3679,3908,4208,4637,4638,6285,6442,6445,6474,6525,6840,6876,6943,7049,7881,8910,9172,9215,10290,10791,51676,54715,57158,64091,140578,221662,283078	ACTC1,BMP4,CAV1,CRYAB,DCN,FHL1,FOXC1,HLF,HOXD9,HOXD10,IGF1,CXCL10,ISL1,ITGA7,LAMA2,MEF2C,MYL6,MYLK,S100B,SGCA,SGCG,SHOX2,SMTN,SVIL,TAGLN,TCF21,TGFBR3,KCNAB1,SGCE,MYOM2,LARGE1,SPEG,VAMP5,ASB2,RBFOX1,JPH2,POPDC2,CHODL,RBM24,MKX
10_Member	GO Biological Processes	GO:0060538	skeletal muscle organ development	-4.29542	-2.8098	21/165	857,1073,1634,3131,3235,3236,4208,4637,6285,6474,6840,6901,6943,7881,9172,9215,10791,51676,54715,64091,221662	CAV1,CFL2,DCN,HLF,HOXD9,HOXD10,MEF2C,MYL6,S100B,SHOX2,SVIL,TAFAZZIN,TCF21,KCNAB1,MYOM2,LARGE1,VAMP5,ASB2,RBFOX1,POPDC2,RBM24
10_Member	GO Biological Processes	GO:0007519	skeletal muscle tissue development	-4.24542	-2.76566	20/154	857,1073,1634,3131,3235,3236,4208,4637,6285,6474,6840,6901,6943,7881,9172,10791,51676,54715,64091,221662	CAV1,CFL2,DCN,HLF,HOXD9,HOXD10,MEF2C,MYL6,S100B,SHOX2,SVIL,TAFAZZIN,TCF21,KCNAB1,MYOM2,VAMP5,ASB2,RBFOX1,POPDC2,RBM24
11_Summary	GO Molecular Functions	GO:0005539	glycosaminoglycan binding	-17.2583	-14.3377	45/232	283,309,652,1305,1490,1511,1634,1809,1842,2200,2247,2252,3075,3512,3627,4745,4753,5212,5764,5788,6373,6403,6422,7049,7060,7097,8839,9353,10178,11095,11096,23213,26577,30817,50859,59352,60484,79625,84870,114548,133584,140578,143903,151887,340419,947,2944,2946,2947,2948,2950,8435,10468,60495	ANG,ANXA6,BMP4,COL13A1,CCN2,CTSG,DCN,DPYSL3,ECM2,FBN1,FGF2,FGF7,CFH,JCHAIN,CXCL10,NELL1,NELL2,VIT,PTN,PTPRC,CXCL11,SELP,SFRP1,TGFBR3,THBS4,TLR2,CCN5,SLIT2,TENM1,ADAMTS8,ADAMTS5,SULF1,PCOLCE2,ADGRE2,SPOCK3,LGR6,HAPLN2,NDNF,RSPO3,NLRP3,EGFLAM,CHODL,LAYN,CCDC80,RSPO2,CD34,GSTM1,GSTM2,GSTM3,GSTM4,GSTP1,SOAT2,FST,HPSE2
11_Member	GO Molecular Functions	GO:0005539	glycosaminoglycan binding	-17.2583	-14.3377	45/232	283,309,652,1305,1490,1511,1634,1809,1842,2200,2247,2252,3075,3512,3627,4745,4753,5212,5764,5788,6373,6403,6422,7049,7060,7097,8839,9353,10178,11095,11096,23213,26577,30817,50859,59352,60484,79625,84870,114548,133584,140578,143903,151887,340419	ANG,ANXA6,BMP4,COL13A1,CCN2,CTSG,DCN,DPYSL3,ECM2,FBN1,FGF2,FGF7,CFH,JCHAIN,CXCL10,NELL1,NELL2,VIT,PTN,PTPRC,CXCL11,SELP,SFRP1,TGFBR3,THBS4,TLR2,CCN5,SLIT2,TENM1,ADAMTS8,ADAMTS5,SULF1,PCOLCE2,ADGRE2,SPOCK3,LGR6,HAPLN2,NDNF,RSPO3,NLRP3,EGFLAM,CHODL,LAYN,CCDC80,RSPO2
11_Member	GO Molecular Functions	GO:1901681	sulfur compound binding	-13.5001	-11.0347	43/267	283,309,652,947,1305,1490,1511,1809,1842,2200,2247,2252,2944,2946,2947,2948,2950,3075,3627,4745,4753,5764,5788,6373,6403,6422,7049,7060,8435,8839,9353,10178,10468,11095,11096,26577,30817,59352,60495,79625,84870,151887,340419	ANG,ANXA6,BMP4,CD34,COL13A1,CCN2,CTSG,DPYSL3,ECM2,FBN1,FGF2,FGF7,GSTM1,GSTM2,GSTM3,GSTM4,GSTP1,CFH,CXCL10,NELL1,NELL2,PTN,PTPRC,CXCL11,SELP,SFRP1,TGFBR3,THBS4,SOAT2,CCN5,SLIT2,TENM1,FST,ADAMTS8,ADAMTS5,PCOLCE2,ADGRE2,LGR6,HPSE2,NDNF,RSPO3,CCDC80,RSPO2
11_Member	GO Molecular Functions	GO:0008201	heparin binding	-11.6411	-9.32257	31/166	283,652,1305,1490,1511,1842,2200,2247,2252,3075,3627,4745,4753,5764,5788,6373,6403,6422,7049,7060,8839,9353,10178,11095,11096,26577,59352,79625,84870,151887,340419	ANG,BMP4,COL13A1,CCN2,CTSG,ECM2,FBN1,FGF2,FGF7,CFH,CXCL10,NELL1,NELL2,PTN,PTPRC,CXCL11,SELP,SFRP1,TGFBR3,THBS4,CCN5,SLIT2,TENM1,ADAMTS8,ADAMTS5,PCOLCE2,LGR6,NDNF,RSPO3,CCDC80,RSPO2
12_Summary	GO Biological Processes	GO:0002683	negative regulation of immune system process	-17.2198	-14.3151	63/433	2,301,384,558,640,652,653,695,972,1524,1803,1843,2200,2213,2294,2633,2737,2841,3071,3106,3123,3134,3398,3428,3575,3598,3821,3958,4068,4254,4332,4345,5272,5295,5532,5654,5788,6376,6387,6422,6504,7043,7098,7805,7940,8530,8832,9353,10225,10875,11213,23208,23228,26191,30009,53347,56253,56833,64092,79626,145581,201633,374403,5592,114757,397,1946,2192,2651,3956,4653,5361,6591,8324,11170,23189,55920,837…	A2M,ANXA1,ARG2,AXL,BLK,BMP4,BMP5,BTK,CD74,CX3CR1,DPP4,DUSP1,FBN1,FCGR2B,FOXF1,GBP1,GLI3,GPR18,NCKAP1L,HLA-B,HLA-DRB1,HLA-F,ID2,IFI16,IL7R,IL13RA2,KLRC1,LGALS3,SH2D1A,KITLG,MNDA,CD200,SERPINB9,PIK3R1,PPP3CB,HTRA1,PTPRC,CX3CL1,CXCL12,SFRP1,SLAMF1,TGFB3,TLR3,LAPTM5,LST1,CST7,CD84,SLIT2,CD96,FGL2,IRAK3,SYT11,PLCL2,PTPN22,TBX21,UBASH3A,CRTAM,SLAMF8,SAMSN1,TNFAIP8L2,LRFN5,TIGIT,TBC1D10C,PRKG1,CYGB,ARHG…
12_Member	GO Biological Processes	GO:0002683	negative regulation of immune system process	-17.2198	-14.3151	63/433	2,301,384,558,640,652,653,695,972,1524,1803,1843,2200,2213,2294,2633,2737,2841,3071,3106,3123,3134,3398,3428,3575,3598,3821,3958,4068,4254,4332,4345,5272,5295,5532,5654,5788,6376,6387,6422,6504,7043,7098,7805,7940,8530,8832,9353,10225,10875,11213,23208,23228,26191,30009,53347,56253,56833,64092,79626,145581,201633,374403	A2M,ANXA1,ARG2,AXL,BLK,BMP4,BMP5,BTK,CD74,CX3CR1,DPP4,DUSP1,FBN1,FCGR2B,FOXF1,GBP1,GLI3,GPR18,NCKAP1L,HLA-B,HLA-DRB1,HLA-F,ID2,IFI16,IL7R,IL13RA2,KLRC1,LGALS3,SH2D1A,KITLG,MNDA,CD200,SERPINB9,PIK3R1,PPP3CB,HTRA1,PTPRC,CX3CL1,CXCL12,SFRP1,SLAMF1,TGFB3,TLR3,LAPTM5,LST1,CST7,CD84,SLIT2,CD96,FGL2,IRAK3,SYT11,PLCL2,PTPN22,TBX21,UBASH3A,CRTAM,SLAMF8,SAMSN1,TNFAIP8L2,LRFN5,TIGIT,TBC1D10C
12_Member	GO Biological Processes	GO:0002695	negative regulation of leukocyte activation	-13.085	-10.6416	35/187	301,384,558,640,652,695,972,2213,2294,2737,3071,3123,3134,3398,3598,3958,4332,4345,5788,6376,6422,7805,7940,8530,8832,10875,23208,26191,30009,56253,64092,79626,145581,201633,374403	ANXA1,ARG2,AXL,BLK,BMP4,BTK,CD74,FCGR2B,FOXF1,GLI3,NCKAP1L,HLA-DRB1,HLA-F,ID2,IL13RA2,LGALS3,MNDA,CD200,PTPRC,CX3CL1,SFRP1,LAPTM5,LST1,CST7,CD84,FGL2,SYT11,PTPN22,TBX21,CRTAM,SAMSN1,TNFAIP8L2,LRFN5,TIGIT,TBC1D10C
12_Member	GO Biological Processes	GO:0050866	negative regulation of cell activation	-12.9411	-10.5134	37/210	301,384,558,640,652,695,972,2213,2294,2737,3071,3123,3134,3398,3598,3958,4332,4345,5592,5788,6376,6422,7805,7940,8530,8832,10875,23208,26191,30009,56253,64092,79626,114757,145581,201633,374403	ANXA1,ARG2,AXL,BLK,BMP4,BTK,CD74,FCGR2B,FOXF1,GLI3,NCKAP1L,HLA-DRB1,HLA-F,ID2,IL13RA2,LGALS3,MNDA,CD200,PRKG1,PTPRC,CX3CL1,SFRP1,LAPTM5,LST1,CST7,CD84,FGL2,SYT11,PTPN22,TBX21,CRTAM,SAMSN1,TNFAIP8L2,CYGB,LRFN5,TIGIT,TBC1D10C
12_Member	GO Biological Processes	GO:0051250	negative regulation of lymphocyte activation	-8.69712	-6.71257	26/157	301,384,558,640,652,695,972,2213,2737,3071,3123,3134,3398,3958,4332,6422,7805,7940,10875,26191,30009,56253,64092,79626,201633,374403	ANXA1,ARG2,AXL,BLK,BMP4,BTK,CD74,FCGR2B,GLI3,NCKAP1L,HLA-DRB1,HLA-F,ID2,LGALS3,MNDA,SFRP1,LAPTM5,LST1,FGL2,PTPN22,TBX21,CRTAM,SAMSN1,TNFAIP8L2,TIGIT,TBC1D10C
12_Member	GO Biological Processes	GO:0007162	negative regulation of cell adhesion	-7.69269	-5.80616	36/303	301,384,397,652,972,1843,1946,2192,2213,2633,2651,2737,3071,3123,3956,3958,4653,5295,5361,5592,5788,6376,6387,6591,7805,8324,10875,11170,23189,26191,30009,55920,56253,79626,83700,201633	ANXA1,ARG2,ARHGDIB,BMP4,CD74,DUSP1,EFNA5,FBLN1,FCGR2B,GBP1,GCNT2,GLI3,NCKAP1L,HLA-DRB1,LGALS1,LGALS3,MYOC,PIK3R1,PLXNA1,PRKG1,PTPRC,CX3CL1,CXCL12,SNAI2,LAPTM5,FZD7,FGL2,FAM107A,KANK1,PTPN22,TBX21,RCC2,CRTAM,TNFAIP8L2,JAM3,TIGIT
12_Member	GO Biological Processes	GO:0050868	negative regulation of T cell activation	-4.29123	-2.81182	16/122	301,384,652,972,2213,2737,3071,3123,3958,7805,10875,26191,30009,56253,79626,201633	ANXA1,ARG2,BMP4,CD74,FCGR2B,GLI3,NCKAP1L,HLA-DRB1,LGALS3,LAPTM5,FGL2,PTPN22,TBX21,CRTAM,TNFAIP8L2,TIGIT
12_Member	GO Biological Processes	GO:1903038	negative regulation of leukocyte cell-cell adhesion	-4.05329	-2.61201	17/141	301,384,652,972,2213,2737,3071,3123,3958,6387,7805,10875,26191,30009,56253,79626,201633	ANXA1,ARG2,BMP4,CD74,FCGR2B,GLI3,NCKAP1L,HLA-DRB1,LGALS3,CXCL12,LAPTM5,FGL2,PTPN22,TBX21,CRTAM,TNFAIP8L2,TIGIT
12_Member	GO Biological Processes	GO:1902106	negative regulation of leukocyte differentiation	-2.93848	-1.71353	12/102	301,652,972,2200,2213,2737,3398,5295,6422,7098,10875,30009	ANXA1,BMP4,CD74,FBN1,FCGR2B,GLI3,ID2,PIK3R1,SFRP1,TLR3,FGL2,TBX21
12_Member	GO Biological Processes	GO:0022408	negative regulation of cell-cell adhesion	-2.85869	-1.62272	20/196	301,384,652,972,2213,2737,3071,3123,3958,5592,6387,7805,9647,10875,23513,26191,30009,56253,79626,201633	ANXA1,ARG2,BMP4,CD74,FCGR2B,GLI3,NCKAP1L,HLA-DRB1,LGALS3,PRKG1,CXCL12,LAPTM5,PPM1F,FGL2,SCRIB,PTPN22,TBX21,CRTAM,TNFAIP8L2,TIGIT
12_Member	GO Biological Processes	GO:1903707	negative regulation of hemopoiesis	-2.79264	-1.59748	12/106	301,652,972,2200,2213,2737,3398,5295,6422,7098,10875,30009	ANXA1,BMP4,CD74,FBN1,FCGR2B,GLI3,ID2,PIK3R1,SFRP1,TLR3,FGL2,TBX21
12_Member	GO Biological Processes	GO:0045620	negative regulation of lymphocyte differentiation	-2.70942	-1.52836	8/55	301,652,972,2737,3398,6422,10875,30009	ANXA1,BMP4,CD74,GLI3,ID2,SFRP1,FGL2,TBX21
13_Summary	GO Biological Processes	GO:0030335	positive regulation of cell migration	-16.7631	-13.8883	72/556	199,301,652,857,972,1236,1436,1524,1601,2247,2252,2294,2316,2621,2651,2886,3071,3082,3479,3611,3627,3676,3690,3815,3958,4162,4254,4638,4653,4908,4916,4921,5063,5168,5295,5336,5354,5743,5764,5788,5919,6352,6363,6376,6387,6403,6504,6546,6591,7010,7060,7205,8613,9480,10253,10371,10512,10630,11170,25960,56034,57381,58494,59352,80031,80310,81029,83700,117581,147372,196527,286077,7162,9353,284119,9638,…	AIF1,ANXA1,BMP4,CAV1,CD74,CCR7,CSF1R,CX3CR1,DAB2,FGF2,FGF7,FOXF1,FLNA,GAS6,GCNT2,GRB7,NCKAP1L,HGF,IGF1,ILK,CXCL10,ITGA4,ITGB3,KIT,LGALS3,MCAM,KITLG,MYLK,MYOC,NTF3,NTRK3,DDR2,PAK3,ENPP2,PIK3R1,PLCG2,PLP1,PTGS2,PTN,PTPRC,RARRES2,CCL5,CCL19,CX3CL1,CXCL12,SELP,SLAMF1,SLC8A1,SNAI2,TEK,THBS4,TRIP6,PLPP3,ONECUT2,SPRY2,SEMA3A,SEMA3C,PDPN,FAM107A,ADGRA2,PDGFC,RHOJ,JAM2,LGR6,SEMA6D,PDGFD,WNT5B,JAM3,TWIST2,…
13_Member	GO Biological Processes	GO:0030335	positive regulation of cell migration	-16.7631	-13.8883	72/556	199,301,652,857,972,1236,1436,1524,1601,2247,2252,2294,2316,2621,2651,2886,3071,3082,3479,3611,3627,3676,3690,3815,3958,4162,4254,4638,4653,4908,4916,4921,5063,5168,5295,5336,5354,5743,5764,5788,5919,6352,6363,6376,6387,6403,6504,6546,6591,7010,7060,7205,8613,9480,10253,10371,10512,10630,11170,25960,56034,57381,58494,59352,80031,80310,81029,83700,117581,147372,196527,286077	AIF1,ANXA1,BMP4,CAV1,CD74,CCR7,CSF1R,CX3CR1,DAB2,FGF2,FGF7,FOXF1,FLNA,GAS6,GCNT2,GRB7,NCKAP1L,HGF,IGF1,ILK,CXCL10,ITGA4,ITGB3,KIT,LGALS3,MCAM,KITLG,MYLK,MYOC,NTF3,NTRK3,DDR2,PAK3,ENPP2,PIK3R1,PLCG2,PLP1,PTGS2,PTN,PTPRC,RARRES2,CCL5,CCL19,CX3CL1,CXCL12,SELP,SLAMF1,SLC8A1,SNAI2,TEK,THBS4,TRIP6,PLPP3,ONECUT2,SPRY2,SEMA3A,SEMA3C,PDPN,FAM107A,ADGRA2,PDGFC,RHOJ,JAM2,LGR6,SEMA6D,PDGFD,WNT5B,JAM3,TWIST2,…
13_Member	GO Biological Processes	GO:0040017	positive regulation of locomotion	-16.7392	-13.8787	75/596	199,301,652,857,972,1236,1436,1524,1601,2247,2252,2294,2316,2621,2651,2886,3071,3082,3479,3611,3627,3676,3690,3815,3958,4162,4254,4638,4653,4908,4916,4921,5063,5168,5295,5336,5354,5743,5764,5788,5919,6352,6363,6376,6387,6403,6504,6546,6591,7010,7060,7162,7205,8613,9353,9480,10253,10371,10512,10630,11170,25960,56034,57381,58494,59352,80031,80310,81029,83700,117581,147372,196527,284119,286077	AIF1,ANXA1,BMP4,CAV1,CD74,CCR7,CSF1R,CX3CR1,DAB2,FGF2,FGF7,FOXF1,FLNA,GAS6,GCNT2,GRB7,NCKAP1L,HGF,IGF1,ILK,CXCL10,ITGA4,ITGB3,KIT,LGALS3,MCAM,KITLG,MYLK,MYOC,NTF3,NTRK3,DDR2,PAK3,ENPP2,PIK3R1,PLCG2,PLP1,PTGS2,PTN,PTPRC,RARRES2,CCL5,CCL19,CX3CL1,CXCL12,SELP,SLAMF1,SLC8A1,SNAI2,TEK,THBS4,TPBG,TRIP6,PLPP3,SLIT2,ONECUT2,SPRY2,SEMA3A,SEMA3C,PDPN,FAM107A,ADGRA2,PDGFC,RHOJ,JAM2,LGR6,SEMA6D,PDGFD,WNT5B,J…
13_Member	GO Biological Processes	GO:0051272	positive regulation of cellular component movement	-16.2802	-13.4724	74/594	199,301,652,857,972,1236,1436,1524,1601,2247,2252,2294,2316,2621,2651,2886,3071,3082,3479,3611,3627,3676,3690,3815,3958,4162,4254,4638,4653,4908,4916,4921,5063,5168,5295,5336,5354,5743,5764,5788,5919,6352,6363,6376,6387,6403,6504,6546,6591,7010,7060,7205,8613,9480,9638,10253,10371,10512,10630,11170,25960,56034,57381,58494,59352,80031,80310,81029,83700,117581,147372,196527,284119,286077	AIF1,ANXA1,BMP4,CAV1,CD74,CCR7,CSF1R,CX3CR1,DAB2,FGF2,FGF7,FOXF1,FLNA,GAS6,GCNT2,GRB7,NCKAP1L,HGF,IGF1,ILK,CXCL10,ITGA4,ITGB3,KIT,LGALS3,MCAM,KITLG,MYLK,MYOC,NTF3,NTRK3,DDR2,PAK3,ENPP2,PIK3R1,PLCG2,PLP1,PTGS2,PTN,PTPRC,RARRES2,CCL5,CCL19,CX3CL1,CXCL12,SELP,SLAMF1,SLC8A1,SNAI2,TEK,THBS4,TRIP6,PLPP3,ONECUT2,FEZ1,SPRY2,SEMA3A,SEMA3C,PDPN,FAM107A,ADGRA2,PDGFC,RHOJ,JAM2,LGR6,SEMA6D,PDGFD,WNT5B,JAM3,TW…
13_Member	GO Biological Processes	GO:2000147	positive regulation of cell motility	-16.2272	-13.4315	73/582	199,301,652,857,972,1236,1436,1524,1601,2247,2252,2294,2316,2621,2651,2886,3071,3082,3479,3611,3627,3676,3690,3815,3958,4162,4254,4638,4653,4908,4916,4921,5063,5168,5295,5336,5354,5743,5764,5788,5919,6352,6363,6376,6387,6403,6504,6546,6591,7010,7060,7205,8613,9480,10253,10371,10512,10630,11170,25960,56034,57381,58494,59352,80031,80310,81029,83700,117581,147372,196527,284119,286077	AIF1,ANXA1,BMP4,CAV1,CD74,CCR7,CSF1R,CX3CR1,DAB2,FGF2,FGF7,FOXF1,FLNA,GAS6,GCNT2,GRB7,NCKAP1L,HGF,IGF1,ILK,CXCL10,ITGA4,ITGB3,KIT,LGALS3,MCAM,KITLG,MYLK,MYOC,NTF3,NTRK3,DDR2,PAK3,ENPP2,PIK3R1,PLCG2,PLP1,PTGS2,PTN,PTPRC,RARRES2,CCL5,CCL19,CX3CL1,CXCL12,SELP,SLAMF1,SLC8A1,SNAI2,TEK,THBS4,TRIP6,PLPP3,ONECUT2,SPRY2,SEMA3A,SEMA3C,PDPN,FAM107A,ADGRA2,PDGFC,RHOJ,JAM2,LGR6,SEMA6D,PDGFD,WNT5B,JAM3,TWIST2,…
13_Member	GO Biological Processes	GO:0001667	ameboidal-type cell migration	-5.24319	-3.63869	42/478	301,309,397,493,652,1634,1803,2247,2252,2697,3611,3670,3676,3690,3815,4163,4208,4254,4921,5063,5168,5176,5336,5743,5764,6546,7010,7162,8613,9353,10371,10512,23189,25959,25960,51421,55920,57381,80031,114757,147372,168667	ANXA1,ANXA6,ARHGDIB,ATP2B4,BMP4,DCN,DPP4,FGF2,FGF7,GJA1,ILK,ISL1,ITGA4,ITGB3,KIT,MCC,MEF2C,KITLG,DDR2,PAK3,ENPP2,SERPINF1,PLCG2,PTGS2,PTN,SLC8A1,TEK,TPBG,PLPP3,SLIT2,SEMA3A,SEMA3C,KANK1,KANK2,ADGRA2,AMOTL2,RCC2,RHOJ,SEMA6D,CYGB,CCBE1,BMPER
13_Member	GO Biological Processes	GO:0090130	tissue migration	-3.38789	-2.06495	30/367	59,70,72,301,493,652,1634,1803,2247,2252,2294,3690,3815,4163,4208,5168,5176,5336,5743,5764,7010,8613,9353,10371,23189,25959,25960,57381,147372,168667	ACTA2,ACTC1,ACTG2,ANXA1,ATP2B4,BMP4,DCN,DPP4,FGF2,FGF7,FOXF1,ITGB3,KIT,MCC,MEF2C,ENPP2,SERPINF1,PLCG2,PTGS2,PTN,TEK,PLPP3,SLIT2,SEMA3A,KANK1,KANK2,ADGRA2,RHOJ,CCBE1,BMPER
13_Member	GO Biological Processes	GO:0010631	epithelial cell migration	-2.29785	-1.1989	26/359	301,493,652,1634,1803,2247,2252,3690,3815,4163,4208,5168,5176,5336,5743,5764,7010,8613,9353,10371,23189,25959,25960,57381,147372,168667	ANXA1,ATP2B4,BMP4,DCN,DPP4,FGF2,FGF7,ITGB3,KIT,MCC,MEF2C,ENPP2,SERPINF1,PLCG2,PTGS2,PTN,TEK,PLPP3,SLIT2,SEMA3A,KANK1,KANK2,ADGRA2,RHOJ,CCBE1,BMPER
13_Member	GO Biological Processes	GO:0090132	epithelium migration	-2.25171	-1.16414	26/362	301,493,652,1634,1803,2247,2252,3690,3815,4163,4208,5168,5176,5336,5743,5764,7010,8613,9353,10371,23189,25959,25960,57381,147372,168667	ANXA1,ATP2B4,BMP4,DCN,DPP4,FGF2,FGF7,ITGB3,KIT,MCC,MEF2C,ENPP2,SERPINF1,PLCG2,PTGS2,PTN,TEK,PLPP3,SLIT2,SEMA3A,KANK1,KANK2,ADGRA2,RHOJ,CCBE1,BMPER
13_Member	GO Biological Processes	GO:0010632	regulation of epithelial cell migration	-2.20473	-1.12859	22/293	301,493,652,1634,2247,2252,3690,4163,4208,5168,5176,5336,5743,5764,7010,8613,9353,10371,25960,57381,147372,168667	ANXA1,ATP2B4,BMP4,DCN,FGF2,FGF7,ITGB3,MCC,MEF2C,ENPP2,SERPINF1,PLCG2,PTGS2,PTN,TEK,PLPP3,SLIT2,SEMA3A,ADGRA2,RHOJ,CCBE1,BMPER
14_Summary	GO Cellular Components	GO:0042383	sarcolemma	-16.5213	-13.7009	34/138	301,477,493,781,857,1291,1292,1674,2318,2692,3745,3764,3908,5239,5348,5532,6263,6442,6445,6517,6546,6769,7043,7412,7414,7871,8082,8910,9499,23336,54221,64091,81493,124093	ANXA1,ATP1A2,ATP2B4,CACNA2D1,CAV1,COL6A1,COL6A2,DES,FLNC,GHRHR,KCNB1,KCNJ8,LAMA2,PGM5,FXYD1,PPP3CB,RYR3,SGCA,SGCG,SLC2A4,SLC8A1,STAC,TGFB3,VCAM1,VCL,SLMAP,SSPN,SGCE,MYOT,SYNM,SNTG2,POPDC2,SYNC,CCDC78
14_Member	GO Cellular Components	GO:0042383	sarcolemma	-16.5213	-13.7009	34/138	301,477,493,781,857,1291,1292,1674,2318,2692,3745,3764,3908,5239,5348,5532,6263,6442,6445,6517,6546,6769,7043,7412,7414,7871,8082,8910,9499,23336,54221,64091,81493,124093	ANXA1,ATP1A2,ATP2B4,CACNA2D1,CAV1,COL6A1,COL6A2,DES,FLNC,GHRHR,KCNB1,KCNJ8,LAMA2,PGM5,FXYD1,PPP3CB,RYR3,SGCA,SGCG,SLC2A4,SLC8A1,STAC,TGFB3,VCAM1,VCL,SLMAP,SSPN,SGCE,MYOT,SYNM,SNTG2,POPDC2,SYNC,CCDC78
15_Summary	GO Biological Processes	GO:0001817	regulation of cytokine production	-15.8941	-13.1219	88/799	199,240,301,384,558,695,834,914,929,940,945,947,972,1191,1236,1436,1524,1536,1992,2213,2621,2633,2841,2950,3071,3082,3106,3113,3115,3123,3134,3394,3428,3479,3574,3600,3606,3670,3702,3815,4050,4052,4060,4332,4345,5295,5336,5450,5552,5743,5788,6363,6376,6504,6591,7043,7096,7097,7098,7349,7805,8832,10225,10333,11035,11213,23180,23208,23213,26191,27020,27190,30009,53347,56253,57447,84632,85480,90865,…	AIF1,ALOX5,ANXA1,ARG2,AXL,BTK,CASP1,CD2,CD14,CD28,CD33,CD34,CD74,CLU,CCR7,CSF1R,CX3CR1,CYBB,SERPINB1,FCGR2B,GAS6,GBP1,GPR18,GSTP1,NCKAP1L,HGF,HLA-B,HLA-DPA1,HLA-DPB1,HLA-DRB1,HLA-F,IRF8,IFI16,IGF1,IL7,IL15,IL18,ISL1,ITK,KIT,LTB,LTBP1,LUM,MNDA,CD200,PIK3R1,PLCG2,POU2AF1,SRGN,PTGS2,PTPRC,CCL19,CX3CL1,SLAMF1,SNAI2,TGFB3,TLR1,TLR2,TLR3,UCN,LAPTM5,CD84,CD96,TLR6,RIPK3,IRAK3,RFTN1,SYT11,SULF1,PTPN22,NP…
15_Member	GO Biological Processes	GO:0001817	regulation of cytokine production	-15.8941	-13.1219	88/799	199,240,301,384,558,695,834,914,929,940,945,947,972,1191,1236,1436,1524,1536,1992,2213,2621,2633,2841,2950,3071,3082,3106,3113,3115,3123,3134,3394,3428,3479,3574,3600,3606,3670,3702,3815,4050,4052,4060,4332,4345,5295,5336,5450,5552,5743,5788,6363,6376,6504,6591,7043,7096,7097,7098,7349,7805,8832,10225,10333,11035,11213,23180,23208,23213,26191,27020,27190,30009,53347,56253,57447,84632,85480,90865,…	AIF1,ALOX5,ANXA1,ARG2,AXL,BTK,CASP1,CD2,CD14,CD28,CD33,CD34,CD74,CLU,CCR7,CSF1R,CX3CR1,CYBB,SERPINB1,FCGR2B,GAS6,GBP1,GPR18,GSTP1,NCKAP1L,HGF,HLA-B,HLA-DPA1,HLA-DPB1,HLA-DRB1,HLA-F,IRF8,IFI16,IGF1,IL7,IL15,IL18,ISL1,ITK,KIT,LTB,LTBP1,LUM,MNDA,CD200,PIK3R1,PLCG2,POU2AF1,SRGN,PTGS2,PTPRC,CCL19,CX3CL1,SLAMF1,SNAI2,TGFB3,TLR1,TLR2,TLR3,UCN,LAPTM5,CD84,CD96,TLR6,RIPK3,IRAK3,RFTN1,SYT11,SULF1,PTPN22,NP…
15_Member	GO Biological Processes	GO:0001819	positive regulation of cytokine production	-13.3533	-10.899	59/467	199,301,834,914,929,940,947,972,1191,1236,1436,1536,3082,3113,3115,3134,3394,3428,3574,3600,3606,3670,3702,3815,4050,4060,4332,4345,5295,5336,5450,5743,5788,6363,6376,6504,7096,7097,7098,7349,7805,10333,11213,23180,23213,26191,27190,56253,84632,85480,90865,114548,115362,117854,120892,147372,201633,338382,340061	AIF1,ANXA1,CASP1,CD2,CD14,CD28,CD34,CD74,CLU,CCR7,CSF1R,CYBB,HGF,HLA-DPA1,HLA-DPB1,HLA-F,IRF8,IFI16,IL7,IL15,IL18,ISL1,ITK,KIT,LTB,LUM,MNDA,CD200,PIK3R1,PLCG2,POU2AF1,PTGS2,PTPRC,CCL19,CX3CL1,SLAMF1,TLR1,TLR2,TLR3,UCN,LAPTM5,TLR6,IRAK3,RFTN1,SULF1,PTPN22,IL17B,CRTAM,AFAP1L2,TSLP,IL33,NLRP3,GBP5,TRIM6,LRRK2,CCBE1,TIGIT,RAB7B,STING1
15_Member	GO Biological Processes	GO:0032640	tumor necrosis factor production	-8.67677	-6.6996	28/180	384,558,914,929,945,947,1191,1524,1536,2621,2841,2950,3479,3670,5295,5336,5788,6363,6376,6504,7096,7097,7098,11213,23208,26191,90865,120892	ARG2,AXL,CD2,CD14,CD33,CD34,CLU,CX3CR1,CYBB,GAS6,GPR18,GSTP1,IGF1,ISL1,PIK3R1,PLCG2,PTPRC,CCL19,CX3CL1,SLAMF1,TLR1,TLR2,TLR3,IRAK3,SYT11,PTPN22,IL33,LRRK2
15_Member	GO Biological Processes	GO:0032680	regulation of tumor necrosis factor production	-8.67677	-6.6996	28/180	384,558,914,929,945,947,1191,1524,1536,2621,2841,2950,3479,3670,5295,5336,5788,6363,6376,6504,7096,7097,7098,11213,23208,26191,90865,120892	ARG2,AXL,CD2,CD14,CD33,CD34,CLU,CX3CR1,CYBB,GAS6,GPR18,GSTP1,IGF1,ISL1,PIK3R1,PLCG2,PTPRC,CCL19,CX3CL1,SLAMF1,TLR1,TLR2,TLR3,IRAK3,SYT11,PTPN22,IL33,LRRK2
15_Member	GO Biological Processes	GO:0071706	tumor necrosis factor superfamily cytokine production	-8.34986	-6.40789	28/186	384,558,914,929,945,947,1191,1524,1536,2621,2841,2950,3479,3670,5295,5336,5788,6363,6376,6504,7096,7097,7098,11213,23208,26191,90865,120892	ARG2,AXL,CD2,CD14,CD33,CD34,CLU,CX3CR1,CYBB,GAS6,GPR18,GSTP1,IGF1,ISL1,PIK3R1,PLCG2,PTPRC,CCL19,CX3CL1,SLAMF1,TLR1,TLR2,TLR3,IRAK3,SYT11,PTPN22,IL33,LRRK2
15_Member	GO Biological Processes	GO:1903555	regulation of tumor necrosis factor superfamily cytokine production	-8.34986	-6.40789	28/186	384,558,914,929,945,947,1191,1524,1536,2621,2841,2950,3479,3670,5295,5336,5788,6363,6376,6504,7096,7097,7098,11213,23208,26191,90865,120892	ARG2,AXL,CD2,CD14,CD33,CD34,CLU,CX3CR1,CYBB,GAS6,GPR18,GSTP1,IGF1,ISL1,PIK3R1,PLCG2,PTPRC,CCL19,CX3CL1,SLAMF1,TLR1,TLR2,TLR3,IRAK3,SYT11,PTPN22,IL33,LRRK2
15_Member	GO Biological Processes	GO:0032635	interleukin-6 production	-7.02036	-5.18033	26/164	199,972,2621,3071,3082,3106,3670,4345,5336,5450,6376,6504,7096,7097,7098,7349,7494,10333,11213,23208,26191,54106,84632,85480,90865,338382	AIF1,CD74,GAS6,NCKAP1L,HGF,HLA-B,ISL1,CD200,PLCG2,POU2AF1,CX3CL1,SLAMF1,TLR1,TLR2,TLR3,UCN,XBP1,TLR6,IRAK3,SYT11,PTPN22,TLR9,AFAP1L2,TSLP,IL33,RAB7B
15_Member	GO Biological Processes	GO:0032675	regulation of interleukin-6 production	-7.02036	-5.18033	26/164	199,972,2621,3071,3082,3106,3670,4345,5336,5450,6376,6504,7096,7097,7098,7349,7494,10333,11213,23208,26191,54106,84632,85480,90865,338382	AIF1,CD74,GAS6,NCKAP1L,HGF,HLA-B,ISL1,CD200,PLCG2,POU2AF1,CX3CL1,SLAMF1,TLR1,TLR2,TLR3,UCN,XBP1,TLR6,IRAK3,SYT11,PTPN22,TLR9,AFAP1L2,TSLP,IL33,RAB7B
15_Member	GO Biological Processes	GO:0032755	positive regulation of interleukin-6 production	-4.41161	-2.91218	15/93	199,972,3670,5336,5450,7096,7097,7098,7349,7494,10333,54106,85480,90865,338382	AIF1,CD74,ISL1,PLCG2,POU2AF1,TLR1,TLR2,TLR3,UCN,XBP1,TLR6,TLR9,TSLP,IL33,RAB7B
15_Member	GO Biological Processes	GO:0032760	positive regulation of tumor necrosis factor production	-4.04586	-2.60626	14/102	914,929,1191,1536,3670,5295,5336,5788,6363,7096,7097,7098,90865,120892	CD2,CD14,CLU,CYBB,ISL1,PIK3R1,PLCG2,PTPRC,CCL19,TLR1,TLR2,TLR3,IL33,LRRK2
15_Member	GO Biological Processes	GO:1903557	positive regulation of tumor necrosis factor superfamily cytokine production	-3.86321	-2.45775	14/106	914,929,1191,1536,3670,5295,5336,5788,6363,7096,7097,7098,90865,120892	CD2,CD14,CLU,CYBB,ISL1,PIK3R1,PLCG2,PTPRC,CCL19,TLR1,TLR2,TLR3,IL33,LRRK2
15_Member	GO Biological Processes	GO:0032677	regulation of interleukin-8 production	-3.39788	-2.05499	14/102	301,914,929,945,965,972,5788,7096,7097,7098,10333,26191,54106,84632	ANXA1,CD2,CD14,CD33,CD58,CD74,PTPRC,TLR1,TLR2,TLR3,TLR6,PTPN22,TLR9,AFAP1L2
15_Member	GO Biological Processes	GO:0032637	interleukin-8 production	-3.35389	-2.01798	14/103	301,914,929,945,965,972,5788,7096,7097,7098,10333,26191,54106,84632	ANXA1,CD2,CD14,CD33,CD58,CD74,PTPRC,TLR1,TLR2,TLR3,TLR6,PTPN22,TLR9,AFAP1L2
16_Summary	GO Biological Processes	GO:0031589	cell-substrate adhesion	-15.8338	-13.084	55/364	558,683,947,1236,1305,1307,1490,1842,1946,2192,2294,2316,2621,2633,2651,2824,3611,3676,3679,3683,3690,3956,4653,5212,5295,5764,5796,5881,6376,6422,7010,7205,7412,7414,8324,8516,8631,8910,9480,10225,10580,10630,11170,22795,23189,55679,55742,55920,79625,83700,84168,133584,151887,158326,255743,6548,9647,10979,577,857,2697,4208,4916,5789,6591,6622,6910,7097,7162,10082,23266,23768,54413,78999,79953,14…	AXL,BST1,CD34,CCR7,COL13A1,COL16A1,CCN2,ECM2,EFNA5,FBLN1,FOXF1,FLNA,GAS6,GBP1,GCNT2,GPM6B,ILK,ITGA4,ITGA7,ITGAL,ITGB3,LGALS1,MYOC,VIT,PIK3R1,PTN,PTPRK,RAC3,CX3CL1,SFRP1,TEK,TRIP6,VCAM1,VCL,FZD7,ITGA8,SKAP1,SGCE,ONECUT2,CD96,SORBS1,PDPN,FAM107A,NID2,KANK1,LIMS2,PARVA,RCC2,NDNF,JAM3,ANTXR1,EGFLAM,CCDC80,FREM1,NPNT,SLC9A1,PPM1F,FERMT2,ADGRB3,CAV1,GJA1,MEF2C,NTRK3,PTPRD,SNAI2,SNCA,TBX5,TLR2,TPBG,GPC6…
16_Member	GO Biological Processes	GO:0031589	cell-substrate adhesion	-15.8338	-13.084	55/364	558,683,947,1236,1305,1307,1490,1842,1946,2192,2294,2316,2621,2633,2651,2824,3611,3676,3679,3683,3690,3956,4653,5212,5295,5764,5796,5881,6376,6422,7010,7205,7412,7414,8324,8516,8631,8910,9480,10225,10580,10630,11170,22795,23189,55679,55742,55920,79625,83700,84168,133584,151887,158326,255743	AXL,BST1,CD34,CCR7,COL13A1,COL16A1,CCN2,ECM2,EFNA5,FBLN1,FOXF1,FLNA,GAS6,GBP1,GCNT2,GPM6B,ILK,ITGA4,ITGA7,ITGAL,ITGB3,LGALS1,MYOC,VIT,PIK3R1,PTN,PTPRK,RAC3,CX3CL1,SFRP1,TEK,TRIP6,VCAM1,VCL,FZD7,ITGA8,SKAP1,SGCE,ONECUT2,CD96,SORBS1,PDPN,FAM107A,NID2,KANK1,LIMS2,PARVA,RCC2,NDNF,JAM3,ANTXR1,EGFLAM,CCDC80,FREM1,NPNT
16_Member	GO Biological Processes	GO:0010810	regulation of cell-substrate adhesion	-10.4014	-8.14988	37/221	683,1236,1307,1842,1946,2192,2294,2316,2633,2651,2824,3611,3956,4653,5212,5295,5764,5881,6376,6422,6548,7010,7414,8324,8631,9480,9647,10630,10979,11170,23189,55679,55920,79625,133584,151887,255743	BST1,CCR7,COL16A1,ECM2,EFNA5,FBLN1,FOXF1,FLNA,GBP1,GCNT2,GPM6B,ILK,LGALS1,MYOC,VIT,PIK3R1,PTN,RAC3,CX3CL1,SFRP1,SLC9A1,TEK,VCL,FZD7,SKAP1,ONECUT2,PPM1F,PDPN,FERMT2,FAM107A,KANK1,LIMS2,RCC2,NDNF,EGFLAM,CCDC80,NPNT
16_Member	GO Biological Processes	GO:0007160	cell-matrix adhesion	-10.2585	-8.02717	38/234	683,947,1236,1305,1307,1490,1842,1946,2824,3611,3676,3679,3683,3690,4653,5295,5796,6376,6422,6548,7010,7205,7412,7414,8516,8631,8910,9480,9647,10225,10580,10979,11170,22795,55920,83700,158326,255743	BST1,CD34,CCR7,COL13A1,COL16A1,CCN2,ECM2,EFNA5,GPM6B,ILK,ITGA4,ITGA7,ITGAL,ITGB3,MYOC,PIK3R1,PTPRK,CX3CL1,SFRP1,SLC9A1,TEK,TRIP6,VCAM1,VCL,ITGA8,SKAP1,SGCE,ONECUT2,PPM1F,CD96,SORBS1,FERMT2,FAM107A,NID2,RCC2,JAM3,FREM1,NPNT
16_Member	GO Biological Processes	GO:1901888	regulation of cell junction assembly	-7.23521	-5.36902	30/204	577,857,1307,1946,2697,2824,4208,4653,4916,5789,6422,6548,6591,6622,6910,7010,7097,7162,7414,9647,10082,10979,11170,23266,23768,54413,55920,78999,79953,145581	ADGRB3,CAV1,COL16A1,EFNA5,GJA1,GPM6B,MEF2C,MYOC,NTRK3,PTPRD,SFRP1,SLC9A1,SNAI2,SNCA,TBX5,TEK,TLR2,TPBG,VCL,PPM1F,GPC6,FERMT2,FAM107A,ADGRL2,FLRT2,NLGN3,RCC2,LRFN4,SYNDIG1,LRFN5
16_Member	GO Biological Processes	GO:0010811	positive regulation of cell-substrate adhesion	-6.34417	-4.56975	21/123	1236,1307,1842,2294,2316,3611,4653,5212,5764,5881,6376,6422,7010,8631,9647,10979,55679,79625,133584,151887,255743	CCR7,COL16A1,ECM2,FOXF1,FLNA,ILK,MYOC,VIT,PTN,RAC3,CX3CL1,SFRP1,TEK,SKAP1,PPM1F,FERMT2,LIMS2,NDNF,EGFLAM,CCDC80,NPNT
16_Member	GO Biological Processes	GO:0034329	cell junction assembly	-5.43987	-3.78432	43/421	60,577,857,1009,1307,1946,2697,2823,2824,4208,4653,4916,5789,5796,6422,6548,6591,6622,6910,7010,7097,7162,7205,7414,9647,10082,10580,10979,11170,11187,22829,23136,23266,23768,24146,26052,27020,54413,55920,78999,79953,83700,145581	ACTB,ADGRB3,CAV1,CDH11,COL16A1,EFNA5,GJA1,GPM6A,GPM6B,MEF2C,MYOC,NTRK3,PTPRD,PTPRK,SFRP1,SLC9A1,SNAI2,SNCA,TBX5,TEK,TLR2,TPBG,TRIP6,VCL,PPM1F,GPC6,SORBS1,FERMT2,FAM107A,PKP3,NLGN4Y,EPB41L3,ADGRL2,FLRT2,CLDN15,DNM3,NPTN,NLGN3,RCC2,LRFN4,SYNDIG1,JAM3,LRFN5
16_Member	GO Biological Processes	GO:0001952	regulation of cell-matrix adhesion	-4.88326	-3.31167	19/128	683,1236,1307,1946,2824,3611,4653,5295,6376,6422,6548,7010,7414,8631,9480,9647,10979,11170,55920	BST1,CCR7,COL16A1,EFNA5,GPM6B,ILK,MYOC,PIK3R1,CX3CL1,SFRP1,SLC9A1,TEK,VCL,SKAP1,ONECUT2,PPM1F,FERMT2,FAM107A,RCC2
16_Member	GO Biological Processes	GO:0048041	focal adhesion assembly	-4.76606	-3.2128	15/87	1307,1946,2824,4653,5796,6422,6548,7010,7205,7414,9647,10580,10979,11170,55920	COL16A1,EFNA5,GPM6B,MYOC,PTPRK,SFRP1,SLC9A1,TEK,TRIP6,VCL,PPM1F,SORBS1,FERMT2,FAM107A,RCC2
16_Member	GO Biological Processes	GO:0150115	cell-substrate junction organization	-4.56494	-3.04262	16/101	1307,1946,2824,4653,5295,5796,6422,6548,7010,7205,7414,9647,10580,10979,11170,55920	COL16A1,EFNA5,GPM6B,MYOC,PIK3R1,PTPRK,SFRP1,SLC9A1,TEK,TRIP6,VCL,PPM1F,SORBS1,FERMT2,FAM107A,RCC2
16_Member	GO Biological Processes	GO:0150116	regulation of cell-substrate junction organization	-4.49607	-2.98677	13/71	1307,1946,2824,4653,5295,6422,6548,7010,7414,9647,10979,11170,55920	COL16A1,EFNA5,GPM6B,MYOC,PIK3R1,SFRP1,SLC9A1,TEK,VCL,PPM1F,FERMT2,FAM107A,RCC2
16_Member	GO Biological Processes	GO:0007044	cell-substrate junction assembly	-4.30076	-2.81395	15/95	1307,1946,2824,4653,5796,6422,6548,7010,7205,7414,9647,10580,10979,11170,55920	COL16A1,EFNA5,GPM6B,MYOC,PTPRK,SFRP1,SLC9A1,TEK,TRIP6,VCL,PPM1F,SORBS1,FERMT2,FAM107A,RCC2
16_Member	GO Biological Processes	GO:0051893	regulation of focal adhesion assembly	-4.16435	-2.70435	12/66	1307,1946,2824,4653,6422,6548,7010,7414,9647,10979,11170,55920	COL16A1,EFNA5,GPM6B,MYOC,SFRP1,SLC9A1,TEK,VCL,PPM1F,FERMT2,FAM107A,RCC2
16_Member	GO Biological Processes	GO:0090109	regulation of cell-substrate junction assembly	-4.16435	-2.70435	12/66	1307,1946,2824,4653,6422,6548,7010,7414,9647,10979,11170,55920	COL16A1,EFNA5,GPM6B,MYOC,SFRP1,SLC9A1,TEK,VCL,PPM1F,FERMT2,FAM107A,RCC2
16_Member	GO Biological Processes	GO:1901890	positive regulation of cell junction assembly	-3.84155	-2.42665	15/104	577,857,1307,4653,5789,6422,6910,7010,7162,9647,10979,23266,23768,54413,79953	ADGRB3,CAV1,COL16A1,MYOC,PTPRD,SFRP1,TBX5,TEK,TPBG,PPM1F,FERMT2,ADGRL2,FLRT2,NLGN3,SYNDIG1
16_Member	GO Biological Processes	GO:0001954	positive regulation of cell-matrix adhesion	-3.37019	-2.029	10/58	1236,1307,3611,4653,6376,6422,7010,8631,9647,10979	CCR7,COL16A1,ILK,MYOC,CX3CL1,SFRP1,TEK,SKAP1,PPM1F,FERMT2
17_Summary	GO Biological Processes	GO:0050778	positive regulation of immune response	-15.3957	-12.6872	71/576	2,301,640,695,715,716,730,911,912,913,919,930,931,940,952,972,1191,1236,1511,1675,1690,2213,2533,2633,3071,3075,3106,3115,3119,3122,3123,3125,3134,3136,3426,3428,3600,3606,3684,3702,3958,4068,4208,4239,4332,5063,5321,5336,5359,5579,5788,6352,6363,6504,7535,7805,8547,8631,8807,23180,23228,26191,30009,50852,53347,56253,114548,115362,117854,340061,100423062,2206,3815,3821,857,929,945,6565,7096,7097,…	A2M,ANXA1,BLK,BTK,C1R,C1S,C7,CD1C,CD1D,CD1E,CD247,CD19,MS4A1,CD28,CD38,CD74,CLU,CCR7,CTSG,CFD,COCH,FCGR2B,FYB1,GBP1,NCKAP1L,CFH,HLA-B,HLA-DPB1,HLA-DQB1,HLA-DRA,HLA-DRB1,HLA-DRB3,HLA-F,HLA-H,CFI,IFI16,IL15,IL18,ITGAM,ITK,LGALS3,SH2D1A,MEF2C,MFAP4,MNDA,PAK3,PLA2G4A,PLCG2,PLSCR1,PRKCB,PTPRC,CCL5,CCL19,SLAMF1,ZAP70,LAPTM5,FCN3,SKAP1,IL18RAP,RFTN1,PLCL2,PTPN22,TBX21,TRAT1,UBASH3A,CRTAM,NLRP3,GBP5,TRIM…
17_Member	GO Biological Processes	GO:0050778	positive regulation of immune response	-15.3957	-12.6872	71/576	2,301,640,695,715,716,730,911,912,913,919,930,931,940,952,972,1191,1236,1511,1675,1690,2213,2533,2633,3071,3075,3106,3115,3119,3122,3123,3125,3134,3136,3426,3428,3600,3606,3684,3702,3958,4068,4208,4239,4332,5063,5321,5336,5359,5579,5788,6352,6363,6504,7535,7805,8547,8631,8807,23180,23228,26191,30009,50852,53347,56253,114548,115362,117854,340061,100423062	A2M,ANXA1,BLK,BTK,C1R,C1S,C7,CD1C,CD1D,CD1E,CD247,CD19,MS4A1,CD28,CD38,CD74,CLU,CCR7,CTSG,CFD,COCH,FCGR2B,FYB1,GBP1,NCKAP1L,CFH,HLA-B,HLA-DPB1,HLA-DQB1,HLA-DRA,HLA-DRB1,HLA-DRB3,HLA-F,HLA-H,CFI,IFI16,IL15,IL18,ITGAM,ITK,LGALS3,SH2D1A,MEF2C,MFAP4,MNDA,PAK3,PLA2G4A,PLCG2,PLSCR1,PRKCB,PTPRC,CCL5,CCL19,SLAMF1,ZAP70,LAPTM5,FCN3,SKAP1,IL18RAP,RFTN1,PLCL2,PTPN22,TBX21,TRAT1,UBASH3A,CRTAM,NLRP3,GBP5,TRIM…
17_Member	GO Biological Processes	GO:0002253	activation of immune response	-10.6007	-8.4161	47/376	2,640,695,715,716,730,919,930,931,940,952,1191,1236,1675,2213,2533,2633,3071,3075,3115,3119,3123,3125,3426,3428,3702,3958,4068,4208,4239,4332,5063,5336,5359,5579,5788,7535,7805,8547,8631,23180,23228,26191,50852,53347,340061,100423062	A2M,BLK,BTK,C1R,C1S,C7,CD247,CD19,MS4A1,CD28,CD38,CLU,CCR7,CFD,FCGR2B,FYB1,GBP1,NCKAP1L,CFH,HLA-DPB1,HLA-DQB1,HLA-DRB1,HLA-DRB3,CFI,IFI16,ITK,LGALS3,SH2D1A,MEF2C,MFAP4,MNDA,PAK3,PLCG2,PLSCR1,PRKCB,PTPRC,ZAP70,LAPTM5,FCN3,SKAP1,RFTN1,PLCL2,PTPN22,TRAT1,UBASH3A,STING1,IGLL5
17_Member	GO Biological Processes	GO:0050851	antigen receptor-mediated signaling pathway	-8.68378	-6.70293	33/240	640,695,919,930,931,940,952,1236,2213,2533,2633,3071,3115,3119,3123,3125,3702,3958,4068,4208,4332,5336,5579,5788,7535,7805,8631,23180,23228,26191,50852,53347,100423062	BLK,BTK,CD247,CD19,MS4A1,CD28,CD38,CCR7,FCGR2B,FYB1,GBP1,NCKAP1L,HLA-DPB1,HLA-DQB1,HLA-DRB1,HLA-DRB3,ITK,LGALS3,SH2D1A,MEF2C,MNDA,PLCG2,PRKCB,PTPRC,ZAP70,LAPTM5,SKAP1,RFTN1,PLCL2,PTPN22,TRAT1,UBASH3A,IGLL5
17_Member	GO Biological Processes	GO:0002768	immune response-regulating cell surface receptor signaling pathway	-8.26539	-6.33178	38/315	640,695,919,930,931,940,952,1236,2206,2213,2533,2633,3071,3115,3119,3123,3125,3702,3815,3821,3958,4068,4208,4332,5063,5336,5359,5579,5788,7535,7805,8631,23180,23228,26191,50852,53347,100423062	BLK,BTK,CD247,CD19,MS4A1,CD28,CD38,CCR7,MS4A2,FCGR2B,FYB1,GBP1,NCKAP1L,HLA-DPB1,HLA-DQB1,HLA-DRB1,HLA-DRB3,ITK,KIT,KLRC1,LGALS3,SH2D1A,MEF2C,MNDA,PAK3,PLCG2,PLSCR1,PRKCB,PTPRC,ZAP70,LAPTM5,SKAP1,RFTN1,PLCL2,PTPN22,TRAT1,UBASH3A,IGLL5
17_Member	GO Biological Processes	GO:0002764	immune response-regulating signaling pathway	-8.23566	-6.30371	49/472	640,695,857,919,929,930,931,940,945,952,1236,2206,2213,2533,2633,3071,3115,3119,3123,3125,3702,3815,3821,3958,4068,4208,4332,5063,5336,5359,5579,5788,6565,7096,7097,7098,7535,7805,8631,10333,11213,23180,23228,26191,50852,53347,81570,338382,100423062	BLK,BTK,CAV1,CD247,CD14,CD19,MS4A1,CD28,CD33,CD38,CCR7,MS4A2,FCGR2B,FYB1,GBP1,NCKAP1L,HLA-DPB1,HLA-DQB1,HLA-DRB1,HLA-DRB3,ITK,KIT,KLRC1,LGALS3,SH2D1A,MEF2C,MNDA,PAK3,PLCG2,PLSCR1,PRKCB,PTPRC,SLC15A2,TLR1,TLR2,TLR3,ZAP70,LAPTM5,SKAP1,TLR6,IRAK3,RFTN1,PLCL2,PTPN22,TRAT1,UBASH3A,CLPB,RAB7B,IGLL5
17_Member	GO Biological Processes	GO:0002429	immune response-activating cell surface receptor signaling pathway	-7.6328	-5.75511	35/291	640,695,919,930,931,940,952,1236,2213,2533,2633,3071,3115,3119,3123,3125,3702,3958,4068,4208,4332,5063,5336,5359,5579,5788,7535,7805,8631,23180,23228,26191,50852,53347,100423062	BLK,BTK,CD247,CD19,MS4A1,CD28,CD38,CCR7,FCGR2B,FYB1,GBP1,NCKAP1L,HLA-DPB1,HLA-DQB1,HLA-DRB1,HLA-DRB3,ITK,LGALS3,SH2D1A,MEF2C,MNDA,PAK3,PLCG2,PLSCR1,PRKCB,PTPRC,ZAP70,LAPTM5,SKAP1,RFTN1,PLCL2,PTPN22,TRAT1,UBASH3A,IGLL5
17_Member	GO Biological Processes	GO:0002757	immune response-activating signal transduction	-7.6328	-5.75511	35/291	640,695,919,930,931,940,952,1236,2213,2533,2633,3071,3115,3119,3123,3125,3702,3958,4068,4208,4332,5063,5336,5359,5579,5788,7535,7805,8631,23180,23228,26191,50852,53347,100423062	BLK,BTK,CD247,CD19,MS4A1,CD28,CD38,CCR7,FCGR2B,FYB1,GBP1,NCKAP1L,HLA-DPB1,HLA-DQB1,HLA-DRB1,HLA-DRB3,ITK,LGALS3,SH2D1A,MEF2C,MNDA,PAK3,PLCG2,PLSCR1,PRKCB,PTPRC,ZAP70,LAPTM5,SKAP1,RFTN1,PLCL2,PTPN22,TRAT1,UBASH3A,IGLL5
17_Member	GO Biological Processes	GO:0050852	T cell receptor signaling pathway	-7.39149	-5.5382	21/123	919,940,1236,2533,2633,3115,3119,3123,3125,3702,3958,4068,5336,5788,7535,7805,8631,23180,26191,50852,53347	CD247,CD28,CCR7,FYB1,GBP1,HLA-DPB1,HLA-DQB1,HLA-DRB1,HLA-DRB3,ITK,LGALS3,SH2D1A,PLCG2,PTPRC,ZAP70,LAPTM5,SKAP1,RFTN1,PTPN22,TRAT1,UBASH3A
17_Member	GO Biological Processes	GO:0050854	regulation of antigen receptor-mediated signaling pathway	-6.58831	-4.81389	14/63	640,930,1236,2213,2633,3958,4068,5579,5788,7805,23228,26191,50852,53347	BLK,CD19,CCR7,FCGR2B,GBP1,LGALS3,SH2D1A,PRKCB,PTPRC,LAPTM5,PLCL2,PTPN22,TRAT1,UBASH3A
17_Member	GO Biological Processes	GO:0050858	negative regulation of antigen receptor-mediated signaling pathway	-4.62564	-3.10432	8/30	2213,2633,3958,4068,7805,23228,26191,53347	FCGR2B,GBP1,LGALS3,SH2D1A,LAPTM5,PLCL2,PTPN22,UBASH3A
17_Member	GO Biological Processes	GO:0050853	B cell receptor signaling pathway	-4.46117	-2.95498	17/131	640,695,930,931,952,2213,3071,3702,4208,4332,5336,5579,5788,23180,23228,26191,100423062	BLK,BTK,CD19,MS4A1,CD38,FCGR2B,NCKAP1L,ITK,MEF2C,MNDA,PLCG2,PRKCB,PTPRC,RFTN1,PLCL2,PTPN22,IGLL5
17_Member	GO Biological Processes	GO:0050860	negative regulation of T cell receptor signaling pathway	-3.65241	-2.28277	6/22	2633,3958,4068,7805,26191,53347	GBP1,LGALS3,SH2D1A,LAPTM5,PTPN22,UBASH3A
17_Member	GO Biological Processes	GO:0050856	regulation of T cell receptor signaling pathway	-3.59034	-2.22788	8/41	1236,2633,3958,4068,7805,26191,50852,53347	CCR7,GBP1,LGALS3,SH2D1A,LAPTM5,PTPN22,TRAT1,UBASH3A
18_Summary	GO Biological Processes	GO:0048729	tissue morphogenesis	-14.8278	-12.1834	73/618	59,60,70,72,652,653,1436,1601,1909,1951,2138,2247,2252,2294,2296,2297,2316,2487,2697,2736,2737,3082,3212,3237,3239,3611,3627,3670,3690,4208,4638,5087,5241,5361,6422,6423,6474,6591,6910,6943,7041,7043,7049,7414,7473,8324,8516,8543,8854,9353,9355,9496,10082,10253,10371,10468,10512,10630,23213,25928,25932,30009,51339,51676,57545,64399,81029,83478,84870,121643,166336,255743,340419,301,384,947,1285,12…	ACTA2,ACTB,ACTC1,ACTG2,BMP4,BMP5,CSF1R,DAB2,EDNRA,CELSR3,EYA1,FGF2,FGF7,FOXF1,FOXC1,FOXD1,FLNA,FRZB,GJA1,GLI2,GLI3,HGF,HOXB2,HOXD11,HOXD13,ILK,CXCL10,ISL1,ITGB3,MEF2C,MYLK,PBX1,PGR,PLXNA1,SFRP1,SFRP2,SHOX2,SNAI2,TBX5,TCF21,TGFB1I1,TGFB3,TGFBR3,VCL,WNT3,FZD7,ITGA8,LMO4,ALDH1A2,SLIT2,LHX2,TBX4,GPC6,SPRY2,SEMA3A,FST,SEMA3C,PDPN,SULF1,SOSTDC1,CLIC4,TBX21,DACT1,ASB2,CC2D2A,HHIP,WNT5B,ARHGAP24,RSPO3,FO…
18_Member	GO Biological Processes	GO:0048729	tissue morphogenesis	-14.8278	-12.1834	73/618	59,60,70,72,652,653,1436,1601,1909,1951,2138,2247,2252,2294,2296,2297,2316,2487,2697,2736,2737,3082,3212,3237,3239,3611,3627,3670,3690,4208,4638,5087,5241,5361,6422,6423,6474,6591,6910,6943,7041,7043,7049,7414,7473,8324,8516,8543,8854,9353,9355,9496,10082,10253,10371,10468,10512,10630,23213,25928,25932,30009,51339,51676,57545,64399,81029,83478,84870,121643,166336,255743,340419	ACTA2,ACTB,ACTC1,ACTG2,BMP4,BMP5,CSF1R,DAB2,EDNRA,CELSR3,EYA1,FGF2,FGF7,FOXF1,FOXC1,FOXD1,FLNA,FRZB,GJA1,GLI2,GLI3,HGF,HOXB2,HOXD11,HOXD13,ILK,CXCL10,ISL1,ITGB3,MEF2C,MYLK,PBX1,PGR,PLXNA1,SFRP1,SFRP2,SHOX2,SNAI2,TBX5,TCF21,TGFB1I1,TGFB3,TGFBR3,VCL,WNT3,FZD7,ITGA8,LMO4,ALDH1A2,SLIT2,LHX2,TBX4,GPC6,SPRY2,SEMA3A,FST,SEMA3C,PDPN,SULF1,SOSTDC1,CLIC4,TBX21,DACT1,ASB2,CC2D2A,HHIP,WNT5B,ARHGAP24,RSPO3,FO…
18_Member	GO Biological Processes	GO:0002009	morphogenesis of an epithelium	-12.2424	-9.86901	60/509	60,652,653,1436,1601,1909,1951,2138,2247,2252,2294,2297,2316,2487,2697,2736,2737,3082,3212,3237,3239,3611,3627,4208,5087,5241,5361,6422,6423,6910,6943,7041,7414,8324,8543,8854,9353,9355,9496,10082,10253,10371,10468,10512,10630,23213,25928,25932,30009,51339,51676,57545,64399,81029,83478,84870,121643,166336,255743,340419	ACTB,BMP4,BMP5,CSF1R,DAB2,EDNRA,CELSR3,EYA1,FGF2,FGF7,FOXF1,FOXD1,FLNA,FRZB,GJA1,GLI2,GLI3,HGF,HOXB2,HOXD11,HOXD13,ILK,CXCL10,MEF2C,PBX1,PGR,PLXNA1,SFRP1,SFRP2,TBX5,TCF21,TGFB1I1,VCL,FZD7,LMO4,ALDH1A2,SLIT2,LHX2,TBX4,GPC6,SPRY2,SEMA3A,FST,SEMA3C,PDPN,SULF1,SOSTDC1,CLIC4,TBX21,DACT1,ASB2,CC2D2A,HHIP,WNT5B,ARHGAP24,RSPO3,FOXN4,PRICKLE2,NPNT,RSPO2
18_Member	GO Biological Processes	GO:0001655	urogenital system development	-11.6349	-9.32037	46/339	59,301,384,652,947,1285,1286,1634,2138,2200,2247,2294,2296,2297,2735,2736,2737,3237,3239,3611,3764,4208,4311,5087,5125,5176,5660,5915,6422,6943,7010,8516,8842,8854,9104,9353,23213,25959,25976,55840,57545,80310,120892,168667,255743,282679	ACTA2,ANXA1,ARG2,BMP4,CD34,COL4A3,COL4A4,DCN,EYA1,FBN1,FGF2,FOXF1,FOXC1,FOXD1,GLI1,GLI2,GLI3,HOXD11,HOXD13,ILK,KCNJ8,MEF2C,MME,PBX1,PCSK5,SERPINF1,PSAP,RARB,SFRP1,TCF21,TEK,ITGA8,PROM1,ALDH1A2,RGN,SLIT2,SULF1,KANK2,TIPARP,EAF2,CC2D2A,PDGFD,LRRK2,BMPER,NPNT,AQP11
18_Member	GO Biological Processes	GO:0072001	renal system development	-10.4031	-8.24156	41/303	59,384,652,947,1285,1286,1634,2138,2200,2247,2294,2296,2297,2736,2737,3237,3611,3764,4208,4311,5087,5125,5176,5915,6422,6943,7010,8516,8842,8854,9104,9353,23213,25959,25976,57545,80310,120892,168667,255743,282679	ACTA2,ARG2,BMP4,CD34,COL4A3,COL4A4,DCN,EYA1,FBN1,FGF2,FOXF1,FOXC1,FOXD1,GLI2,GLI3,HOXD11,ILK,KCNJ8,MEF2C,MME,PBX1,PCSK5,SERPINF1,RARB,SFRP1,TCF21,TEK,ITGA8,PROM1,ALDH1A2,RGN,SLIT2,SULF1,KANK2,TIPARP,CC2D2A,PDGFD,LRRK2,BMPER,NPNT,AQP11
18_Member	GO Biological Processes	GO:0001763	morphogenesis of a branching structure	-10.3195	-8.16434	32/197	652,1305,1909,2138,2247,2252,2294,2297,2736,2737,3082,3237,3239,3611,5087,5241,5361,6422,6423,6474,6943,9353,10253,10371,10512,23213,25932,64399,84870,120892,255743,340419	BMP4,COL13A1,EDNRA,EYA1,FGF2,FGF7,FOXF1,FOXD1,GLI2,GLI3,HGF,HOXD11,HOXD13,ILK,PBX1,PGR,PLXNA1,SFRP1,SFRP2,SHOX2,TCF21,SLIT2,SPRY2,SEMA3A,SEMA3C,SULF1,CLIC4,HHIP,RSPO3,LRRK2,NPNT,RSPO2
18_Member	GO Biological Processes	GO:0001822	kidney development	-10.2393	-8.1022	40/294	59,384,652,947,1285,1286,1634,2138,2200,2247,2296,2297,2736,2737,3237,3611,3764,4208,4311,5087,5125,5176,5915,6422,6943,7010,8516,8842,8854,9104,9353,23213,25959,25976,57545,80310,120892,168667,255743,282679	ACTA2,ARG2,BMP4,CD34,COL4A3,COL4A4,DCN,EYA1,FBN1,FGF2,FOXC1,FOXD1,GLI2,GLI3,HOXD11,ILK,KCNJ8,MEF2C,MME,PBX1,PCSK5,SERPINF1,RARB,SFRP1,TCF21,TEK,ITGA8,PROM1,ALDH1A2,RGN,SLIT2,SULF1,KANK2,TIPARP,CC2D2A,PDGFD,LRRK2,BMPER,NPNT,AQP11
18_Member	GO Biological Processes	GO:0061138	morphogenesis of a branching epithelium	-9.15598	-7.12004	29/183	652,1909,2138,2247,2252,2294,2297,2736,2737,3082,3237,3239,3611,5087,5241,5361,6422,6423,6943,9353,10253,10371,10512,23213,25932,64399,84870,255743,340419	BMP4,EDNRA,EYA1,FGF2,FGF7,FOXF1,FOXD1,GLI2,GLI3,HGF,HOXD11,HOXD13,ILK,PBX1,PGR,PLXNA1,SFRP1,SFRP2,TCF21,SLIT2,SPRY2,SEMA3A,SEMA3C,SULF1,CLIC4,HHIP,RSPO3,NPNT,RSPO2
18_Member	GO Biological Processes	GO:0072073	kidney epithelium development	-6.62031	-4.84198	21/136	384,652,947,2138,2247,2296,2297,2737,3237,3611,4208,5087,5915,6422,6943,8842,9353,25959,168667,255743,282679	ARG2,BMP4,CD34,EYA1,FGF2,FOXC1,FOXD1,GLI3,HOXD11,ILK,MEF2C,PBX1,RARB,SFRP1,TCF21,PROM1,SLIT2,KANK2,BMPER,NPNT,AQP11
18_Member	GO Biological Processes	GO:0001657	ureteric bud development	-5.96282	-4.26315	16/91	384,652,2138,2247,2296,2297,2737,3237,3611,5087,5915,6422,6943,9353,168667,255743	ARG2,BMP4,EYA1,FGF2,FOXC1,FOXD1,GLI3,HOXD11,ILK,PBX1,RARB,SFRP1,TCF21,SLIT2,BMPER,NPNT
18_Member	GO Biological Processes	GO:0072163	mesonephric epithelium development	-5.8969	-4.203	16/92	384,652,2138,2247,2296,2297,2737,3237,3611,5087,5915,6422,6943,9353,168667,255743	ARG2,BMP4,EYA1,FGF2,FOXC1,FOXD1,GLI3,HOXD11,ILK,PBX1,RARB,SFRP1,TCF21,SLIT2,BMPER,NPNT
18_Member	GO Biological Processes	GO:0072164	mesonephric tubule development	-5.8969	-4.203	16/92	384,652,2138,2247,2296,2297,2737,3237,3611,5087,5915,6422,6943,9353,168667,255743	ARG2,BMP4,EYA1,FGF2,FOXC1,FOXD1,GLI3,HOXD11,ILK,PBX1,RARB,SFRP1,TCF21,SLIT2,BMPER,NPNT
18_Member	GO Biological Processes	GO:0001823	mesonephros development	-5.64278	-3.99157	16/96	384,652,2138,2247,2296,2297,2737,3237,3611,5087,5915,6422,6943,9353,168667,255743	ARG2,BMP4,EYA1,FGF2,FOXC1,FOXD1,GLI3,HOXD11,ILK,PBX1,RARB,SFRP1,TCF21,SLIT2,BMPER,NPNT
18_Member	GO Biological Processes	GO:0048754	branching morphogenesis of an epithelial tube	-5.22915	-3.62697	20/152	652,1909,2138,2247,2294,2297,2736,2737,3237,3611,5087,5241,6423,6943,9353,10253,25932,64399,255743,340419	BMP4,EDNRA,EYA1,FGF2,FOXF1,FOXD1,GLI2,GLI3,HOXD11,ILK,PBX1,PGR,SFRP2,TCF21,SLIT2,SPRY2,CLIC4,HHIP,NPNT,RSPO2
18_Member	GO Biological Processes	GO:0060562	epithelial tube morphogenesis	-4.9881	-3.42152	32/330	652,653,1436,1909,2138,2247,2294,2297,2736,2737,3237,3611,3627,4208,5087,5241,6422,6423,6943,8543,9353,9355,10253,25928,25932,30009,51676,57545,64399,121643,255743,340419	BMP4,BMP5,CSF1R,EDNRA,EYA1,FGF2,FOXF1,FOXD1,GLI2,GLI3,HOXD11,ILK,CXCL10,MEF2C,PBX1,PGR,SFRP1,SFRP2,TCF21,LMO4,SLIT2,LHX2,SPRY2,SOSTDC1,CLIC4,TBX21,ASB2,CC2D2A,HHIP,FOXN4,NPNT,RSPO2
18_Member	GO Biological Processes	GO:0072009	nephron epithelium development	-4.30528	-2.82378	15/109	652,947,2138,2247,2296,2297,2737,3237,3611,4208,5087,6943,8842,255743,282679	BMP4,CD34,EYA1,FGF2,FOXC1,FOXD1,GLI3,HOXD11,ILK,MEF2C,PBX1,TCF21,PROM1,NPNT,AQP11
18_Member	GO Biological Processes	GO:0001658	branching involved in ureteric bud morphogenesis	-4.00868	-2.57637	10/56	652,2138,2247,2297,2737,3237,3611,5087,6943,255743	BMP4,EYA1,FGF2,FOXD1,GLI3,HOXD11,ILK,PBX1,TCF21,NPNT
18_Member	GO Biological Processes	GO:0072080	nephron tubule development	-3.97883	-2.55223	13/91	652,2138,2247,2297,2737,3237,3611,4208,5087,6943,8842,255743,282679	BMP4,EYA1,FGF2,FOXD1,GLI3,HOXD11,ILK,MEF2C,PBX1,TCF21,PROM1,NPNT,AQP11
18_Member	GO Biological Processes	GO:0061326	renal tubule development	-3.83285	-2.42886	13/94	652,2138,2247,2297,2737,3237,3611,4208,5087,6943,8842,255743,282679	BMP4,EYA1,FGF2,FOXD1,GLI3,HOXD11,ILK,MEF2C,PBX1,TCF21,PROM1,NPNT,AQP11
18_Member	GO Biological Processes	GO:0060675	ureteric bud morphogenesis	-3.62731	-2.25993	10/62	652,2138,2247,2297,2737,3237,3611,5087,6943,255743	BMP4,EYA1,FGF2,FOXD1,GLI3,HOXD11,ILK,PBX1,TCF21,NPNT
18_Member	GO Biological Processes	GO:0072171	mesonephric tubule morphogenesis	-3.56866	-2.20939	10/63	652,2138,2247,2297,2737,3237,3611,5087,6943,255743	BMP4,EYA1,FGF2,FOXD1,GLI3,HOXD11,ILK,PBX1,TCF21,NPNT
18_Member	GO Biological Processes	GO:0061333	renal tubule morphogenesis	-3.55697	-2.19982	11/75	652,2138,2247,2297,2737,3237,3611,4208,5087,6943,255743	BMP4,EYA1,FGF2,FOXD1,GLI3,HOXD11,ILK,MEF2C,PBX1,TCF21,NPNT
18_Member	GO Biological Processes	GO:0072078	nephron tubule morphogenesis	-3.1418	-1.87304	10/71	652,2138,2247,2297,2737,3237,3611,5087,6943,255743	BMP4,EYA1,FGF2,FOXD1,GLI3,HOXD11,ILK,PBX1,TCF21,NPNT
18_Member	GO Biological Processes	GO:0072088	nephron epithelium morphogenesis	-3.04556	-1.79999	10/73	652,2138,2247,2297,2737,3237,3611,5087,6943,255743	BMP4,EYA1,FGF2,FOXD1,GLI3,HOXD11,ILK,PBX1,TCF21,NPNT
18_Member	GO Biological Processes	GO:0072028	nephron morphogenesis	-2.90805	-1.69031	10/76	652,2138,2247,2297,2737,3237,3611,5087,6943,255743	BMP4,EYA1,FGF2,FOXD1,GLI3,HOXD11,ILK,PBX1,TCF21,NPNT
18_Member	GO Biological Processes	GO:0060993	kidney morphogenesis	-2.72059	-1.5376	11/94	652,2138,2247,2297,2737,3237,3611,5087,6943,120892,255743	BMP4,EYA1,FGF2,FOXD1,GLI3,HOXD11,ILK,PBX1,TCF21,LRRK2,NPNT
19_Summary	GO Biological Processes	GO:0050900	leukocyte migration	-14.7965	-12.1606	54/372	199,240,301,653,683,947,972,1234,1236,1436,1524,1803,1843,1880,2350,2621,2841,3071,3627,3676,3683,3815,3958,4254,4283,4345,5764,5919,6352,6363,6373,6376,6387,6403,6504,6558,7060,7412,7535,9023,9353,11035,30009,30817,51676,56253,56833,58494,80310,83700,114548,120425,151647,196527,1902,2247,2950,3082,7162,10663,55742,4908,4916,7473,10371,10512,25960,80031	AIF1,ALOX5,ANXA1,BMP5,BST1,CD34,CD74,CCR5,CCR7,CSF1R,CX3CR1,DPP4,DUSP1,GPR183,FOLR2,GAS6,GPR18,NCKAP1L,CXCL10,ITGA4,ITGAL,KIT,LGALS3,KITLG,CXCL9,CD200,PTN,RARRES2,CCL5,CCL19,CXCL11,CX3CL1,CXCL12,SELP,SLAMF1,SLC12A2,THBS4,VCAM1,ZAP70,CH25H,SLIT2,RIPK3,TBX21,ADGRE2,ASB2,CRTAM,SLAMF8,JAM2,PDGFD,JAM3,NLRP3,JAML,TAFA4,ANO6,LPAR1,FGF2,GSTP1,HGF,TPBG,CXCR6,PARVA,NTF3,NTRK3,WNT3,SEMA3A,SEMA3C,ADGRA2,SEMA…
19_Member	GO Biological Processes	GO:0050900	leukocyte migration	-14.7965	-12.1606	54/372	199,240,301,653,683,947,972,1234,1236,1436,1524,1803,1843,1880,2350,2621,2841,3071,3627,3676,3683,3815,3958,4254,4283,4345,5764,5919,6352,6363,6373,6376,6387,6403,6504,6558,7060,7412,7535,9023,9353,11035,30009,30817,51676,56253,56833,58494,80310,83700,114548,120425,151647,196527	AIF1,ALOX5,ANXA1,BMP5,BST1,CD34,CD74,CCR5,CCR7,CSF1R,CX3CR1,DPP4,DUSP1,GPR183,FOLR2,GAS6,GPR18,NCKAP1L,CXCL10,ITGA4,ITGAL,KIT,LGALS3,KITLG,CXCL9,CD200,PTN,RARRES2,CCL5,CCL19,CXCL11,CX3CL1,CXCL12,SELP,SLAMF1,SLC12A2,THBS4,VCAM1,ZAP70,CH25H,SLIT2,RIPK3,TBX21,ADGRE2,ASB2,CRTAM,SLAMF8,JAM2,PDGFD,JAM3,NLRP3,JAML,TAFA4,ANO6
19_Member	GO Biological Processes	GO:0071674	mononuclear cell migration	-13.9165	-11.4097	37/196	199,240,301,653,1234,1236,1436,1524,1843,1880,2350,2621,3627,3676,3683,3958,4345,5919,6352,6363,6373,6376,6387,6504,6558,7535,9023,9353,11035,30009,51676,56253,56833,58494,80310,120425,196527	AIF1,ALOX5,ANXA1,BMP5,CCR5,CCR7,CSF1R,CX3CR1,DUSP1,GPR183,FOLR2,GAS6,CXCL10,ITGA4,ITGAL,LGALS3,CD200,RARRES2,CCL5,CCL19,CXCL11,CX3CL1,CXCL12,SLAMF1,SLC12A2,ZAP70,CH25H,SLIT2,RIPK3,TBX21,ASB2,CRTAM,SLAMF8,JAM2,PDGFD,JAML,ANO6
19_Member	GO Biological Processes	GO:0060326	cell chemotaxis	-13.5695	-11.0984	47/312	199,240,301,683,972,1234,1236,1436,1524,1803,1843,1880,1902,2247,2350,2621,2841,2950,3071,3082,3627,3815,3958,4283,5764,5919,6352,6363,6373,6376,6387,6504,6558,7060,7162,7412,9023,9353,10663,30817,55742,56833,80310,83700,120425,151647,196527	AIF1,ALOX5,ANXA1,BST1,CD74,CCR5,CCR7,CSF1R,CX3CR1,DPP4,DUSP1,GPR183,LPAR1,FGF2,FOLR2,GAS6,GPR18,GSTP1,NCKAP1L,HGF,CXCL10,KIT,LGALS3,CXCL9,PTN,RARRES2,CCL5,CCL19,CXCL11,CX3CL1,CXCL12,SLAMF1,SLC12A2,THBS4,TPBG,VCAM1,CH25H,SLIT2,CXCR6,ADGRE2,PARVA,SLAMF8,PDGFD,JAM3,JAML,TAFA4,ANO6
19_Member	GO Biological Processes	GO:0030595	leukocyte chemotaxis	-12.2422	-9.86901	38/232	199,240,301,683,972,1234,1236,1436,1524,1803,1843,1880,2350,2621,2841,3071,3627,3815,3958,4283,5764,5919,6352,6363,6373,6376,6387,6504,6558,7060,9023,9353,30817,56833,83700,120425,151647,196527	AIF1,ALOX5,ANXA1,BST1,CD74,CCR5,CCR7,CSF1R,CX3CR1,DPP4,DUSP1,GPR183,FOLR2,GAS6,GPR18,NCKAP1L,CXCL10,KIT,LGALS3,CXCL9,PTN,RARRES2,CCL5,CCL19,CXCL11,CX3CL1,CXCL12,SLAMF1,SLC12A2,THBS4,CH25H,SLIT2,ADGRE2,SLAMF8,JAM3,JAML,TAFA4,ANO6
19_Member	GO Biological Processes	GO:0002685	regulation of leukocyte migration	-10.7638	-8.55802	34/212	199,301,653,683,972,1236,1436,1524,1803,1843,2621,2841,3071,3627,3676,3958,4254,4345,5764,5919,6352,6363,6376,6387,6403,6504,7060,9353,11035,56833,58494,80310,83700,196527	AIF1,ANXA1,BMP5,BST1,CD74,CCR7,CSF1R,CX3CR1,DPP4,DUSP1,GAS6,GPR18,NCKAP1L,CXCL10,ITGA4,LGALS3,KITLG,CD200,PTN,RARRES2,CCL5,CCL19,CX3CL1,CXCL12,SELP,SLAMF1,THBS4,SLIT2,RIPK3,SLAMF8,JAM2,PDGFD,JAM3,ANO6
19_Member	GO Biological Processes	GO:0050920	regulation of chemotaxis	-10.7309	-8.52816	35/224	199,683,972,1236,1436,1524,1803,1843,1880,2247,2621,2841,2950,3071,3627,4908,4916,5764,5919,6352,6363,6387,6504,7060,7162,7473,9353,10371,10512,25960,56833,80031,80310,83700,196527	AIF1,BST1,CD74,CCR7,CSF1R,CX3CR1,DPP4,DUSP1,GPR183,FGF2,GAS6,GPR18,GSTP1,NCKAP1L,CXCL10,NTF3,NTRK3,PTN,RARRES2,CCL5,CCL19,CXCL12,SLAMF1,THBS4,TPBG,WNT3,SLIT2,SEMA3A,SEMA3C,ADGRA2,SLAMF8,SEMA6D,PDGFD,JAM3,ANO6
19_Member	GO Biological Processes	GO:0097529	myeloid leukocyte migration	-8.90921	-6.89175	32/223	199,301,683,972,1236,1436,1524,1803,1843,2350,3071,3627,3815,3958,4283,4345,5919,6352,6363,6373,6376,6387,6504,7060,9353,30817,56833,80310,83700,120425,151647,196527	AIF1,ANXA1,BST1,CD74,CCR7,CSF1R,CX3CR1,DPP4,DUSP1,FOLR2,NCKAP1L,CXCL10,KIT,LGALS3,CXCL9,CD200,RARRES2,CCL5,CCL19,CXCL11,CX3CL1,CXCL12,SLAMF1,THBS4,SLIT2,ADGRE2,SLAMF8,PDGFD,JAM3,JAML,TAFA4,ANO6
19_Member	GO Biological Processes	GO:0002688	regulation of leukocyte chemotaxis	-8.82518	-6.81938	23/123	199,683,972,1236,1436,1524,1803,1843,2621,2841,3071,3627,5764,5919,6352,6363,6387,6504,7060,9353,56833,83700,196527	AIF1,BST1,CD74,CCR7,CSF1R,CX3CR1,DPP4,DUSP1,GAS6,GPR18,NCKAP1L,CXCL10,PTN,RARRES2,CCL5,CCL19,CXCL12,SLAMF1,THBS4,SLIT2,SLAMF8,JAM3,ANO6
19_Member	GO Biological Processes	GO:0002687	positive regulation of leukocyte migration	-8.71593	-6.72517	24/135	199,972,1236,1436,1524,2621,3071,3627,3676,3958,4254,5764,5919,6352,6363,6376,6387,6403,6504,7060,58494,80310,83700,196527	AIF1,CD74,CCR7,CSF1R,CX3CR1,GAS6,NCKAP1L,CXCL10,ITGA4,LGALS3,KITLG,PTN,RARRES2,CCL5,CCL19,CX3CL1,CXCL12,SELP,SLAMF1,THBS4,JAM2,PDGFD,JAM3,ANO6
19_Member	GO Biological Processes	GO:0071621	granulocyte chemotaxis	-7.26559	-5.42422	21/125	301,683,972,1236,1436,1803,3071,3627,3958,4283,5919,6352,6363,6373,6376,6504,7060,9353,30817,83700,120425	ANXA1,BST1,CD74,CCR7,CSF1R,DPP4,NCKAP1L,CXCL10,LGALS3,CXCL9,RARRES2,CCL5,CCL19,CXCL11,CX3CL1,SLAMF1,THBS4,SLIT2,ADGRE2,JAM3,JAML
19_Member	GO Biological Processes	GO:0050921	positive regulation of chemotaxis	-6.98618	-5.17208	22/141	199,972,1236,1436,1524,2247,2621,3071,3627,4908,4916,5764,5919,6352,6363,6387,6504,7060,7162,9353,80310,196527	AIF1,CD74,CCR7,CSF1R,CX3CR1,FGF2,GAS6,NCKAP1L,CXCL10,NTF3,NTRK3,PTN,RARRES2,CCL5,CCL19,CXCL12,SLAMF1,THBS4,TPBG,SLIT2,PDGFD,ANO6
19_Member	GO Biological Processes	GO:0071622	regulation of granulocyte chemotaxis	-6.91043	-5.10258	13/51	683,972,1236,1436,1803,3071,5919,6352,6363,6504,7060,9353,83700	BST1,CD74,CCR7,CSF1R,DPP4,NCKAP1L,RARRES2,CCL5,CCL19,SLAMF1,THBS4,SLIT2,JAM3
19_Member	GO Biological Processes	GO:0097530	granulocyte migration	-6.55476	-4.78492	22/149	301,683,972,1236,1436,1803,3071,3627,3958,4283,5919,6352,6363,6373,6376,6504,7060,9353,30817,56833,83700,120425	ANXA1,BST1,CD74,CCR7,CSF1R,DPP4,NCKAP1L,CXCL10,LGALS3,CXCL9,RARRES2,CCL5,CCL19,CXCL11,CX3CL1,SLAMF1,THBS4,SLIT2,ADGRE2,SLAMF8,JAM3,JAML
19_Member	GO Biological Processes	GO:0002690	positive regulation of leukocyte chemotaxis	-5.76797	-4.09549	16/94	199,972,1236,1436,1524,2621,3071,3627,5764,5919,6352,6363,6387,6504,7060,196527	AIF1,CD74,CCR7,CSF1R,CX3CR1,GAS6,NCKAP1L,CXCL10,PTN,RARRES2,CCL5,CCL19,CXCL12,SLAMF1,THBS4,ANO6
19_Member	GO Biological Processes	GO:0090022	regulation of neutrophil chemotaxis	-5.34708	-3.72676	9/32	683,972,1236,1803,3071,6363,7060,9353,83700	BST1,CD74,CCR7,DPP4,NCKAP1L,CCL19,THBS4,SLIT2,JAM3
19_Member	GO Biological Processes	GO:0030593	neutrophil chemotaxis	-5.2317	-3.62875	16/103	683,972,1236,1803,3071,3627,3958,4283,6352,6363,6373,6376,7060,9353,83700,120425	BST1,CD74,CCR7,DPP4,NCKAP1L,CXCL10,LGALS3,CXCL9,CCL5,CCL19,CXCL11,CX3CL1,THBS4,SLIT2,JAM3,JAML
19_Member	GO Biological Processes	GO:1902622	regulation of neutrophil migration	-5.16154	-3.56927	10/42	683,972,1236,1803,3071,6363,7060,9353,56833,83700	BST1,CD74,CCR7,DPP4,NCKAP1L,CCL19,THBS4,SLIT2,SLAMF8,JAM3
19_Member	GO Biological Processes	GO:1990266	neutrophil migration	-4.82228	-3.27451	17/123	683,972,1236,1803,3071,3627,3958,4283,6352,6363,6373,6376,7060,9353,56833,83700,120425	BST1,CD74,CCR7,DPP4,NCKAP1L,CXCL10,LGALS3,CXCL9,CCL5,CCL19,CXCL11,CX3CL1,THBS4,SLIT2,SLAMF8,JAM3,JAML
20_Summary	GO Biological Processes	GO:0006816	calcium ion transport	-14.7708	-12.0317	63/422	309,356,477,488,493,781,801,805,845,857,930,931,945,1234,1236,1490,2247,2621,2697,2823,2946,3627,3708,3958,4283,4638,5023,5336,5350,5354,5579,5743,5788,6263,6352,6363,6373,6376,6387,6546,6548,6622,6769,7220,7223,7349,8787,8832,9104,9722,10316,10343,23413,51393,54106,55799,57158,57419,79054,93589,196527,286097,406922,111,212,730,952,1043,1203,1524,1634,1657,1902,1909,2273,2841,3778,4653,5172,5732,…	ANXA6,FASLG,ATP1A2,ATP2A2,ATP2B4,CACNA2D1,CALM1,CALM2,CASQ2,CAV1,CD19,MS4A1,CD33,CCR5,CCR7,CCN2,FGF2,GAS6,GJA1,GPM6A,GSTM2,CXCL10,ITPR1,LGALS3,CXCL9,MYLK,P2RX1,PLCG2,PLN,PLP1,PRKCB,PTGS2,PTPRC,RYR3,CCL5,CCL19,CXCL11,CX3CL1,CXCL12,SLC8A1,SLC9A1,SNCA,STAC,TRPC1,TRPC4,UCN,RGS9,CD84,RGN,NOS1AP,NMUR1,PKDREJ,NCS1,TRPV2,TLR9,CACNA2D3,JPH2,SLC24A3,TRPM8,CACNA2D4,ANO6,MICU3,MIR133A1,ADCY5,ALAS2,C7,CD38,CD…
20_Member	GO Biological Processes	GO:0006816	calcium ion transport	-14.7708	-12.0317	63/422	309,356,477,488,493,781,801,805,845,857,930,931,945,1234,1236,1490,2247,2621,2697,2823,2946,3627,3708,3958,4283,4638,5023,5336,5350,5354,5579,5743,5788,6263,6352,6363,6373,6376,6387,6546,6548,6622,6769,7220,7223,7349,8787,8832,9104,9722,10316,10343,23413,51393,54106,55799,57158,57419,79054,93589,196527,286097,406922	ANXA6,FASLG,ATP1A2,ATP2A2,ATP2B4,CACNA2D1,CALM1,CALM2,CASQ2,CAV1,CD19,MS4A1,CD33,CCR5,CCR7,CCN2,FGF2,GAS6,GJA1,GPM6A,GSTM2,CXCL10,ITPR1,LGALS3,CXCL9,MYLK,P2RX1,PLCG2,PLN,PLP1,PRKCB,PTGS2,PTPRC,RYR3,CCL5,CCL19,CXCL11,CX3CL1,CXCL12,SLC8A1,SLC9A1,SNCA,STAC,TRPC1,TRPC4,UCN,RGS9,CD84,RGN,NOS1AP,NMUR1,PKDREJ,NCS1,TRPV2,TLR9,CACNA2D3,JPH2,SLC24A3,TRPM8,CACNA2D4,ANO6,MICU3,MIR133A1
20_Member	GO Biological Processes	GO:0070588	calcium ion transmembrane transport	-12.4667	-10.0068	49/312	309,356,477,488,493,781,801,805,845,930,1234,1236,2247,2621,2823,2946,3627,3708,4283,5023,5336,5350,5354,5788,6263,6363,6373,6376,6546,6548,6622,6769,7220,7223,8787,9104,9722,10343,23413,51393,54106,55799,57158,57419,79054,93589,196527,286097,406922	ANXA6,FASLG,ATP1A2,ATP2A2,ATP2B4,CACNA2D1,CALM1,CALM2,CASQ2,CD19,CCR5,CCR7,FGF2,GAS6,GPM6A,GSTM2,CXCL10,ITPR1,CXCL9,P2RX1,PLCG2,PLN,PLP1,PTPRC,RYR3,CCL19,CXCL11,CX3CL1,SLC8A1,SLC9A1,SNCA,STAC,TRPC1,TRPC4,RGS9,RGN,NOS1AP,PKDREJ,NCS1,TRPV2,TLR9,CACNA2D3,JPH2,SLC24A3,TRPM8,CACNA2D4,ANO6,MICU3,MIR133A1
20_Member	GO Biological Processes	GO:0050801	ion homeostasis	-12.453	-10.0505	80/792	111,212,309,356,477,488,493,730,781,801,845,857,930,931,952,1043,1203,1234,1236,1524,1634,1657,1902,1909,2247,2273,2697,2841,2946,3627,3708,3778,4283,4653,5023,5172,5336,5350,5579,5732,5788,6263,6327,6332,6352,6363,6373,6376,6387,6424,6546,6558,6560,6622,6910,7223,7871,8477,8614,9104,9709,9843,10161,10663,10699,23413,25932,27020,30061,51393,56833,56898,57158,57419,79054,79901,120892,282679,286097…	ADCY5,ALAS2,ANXA6,FASLG,ATP1A2,ATP2A2,ATP2B4,C7,CACNA2D1,CALM1,CASQ2,CAV1,CD19,MS4A1,CD38,CD52,CLN5,CCR5,CCR7,CX3CR1,DCN,DMXL1,LPAR1,EDNRA,FGF2,FHL1,GJA1,GPR18,GSTM2,CXCL10,ITPR1,KCNMA1,CXCL9,MYOC,P2RX1,SLC26A4,PLCG2,PLN,PRKCB,PTGER2,PTPRC,RYR3,SCN2B,SCN7A,CCL5,CCL19,CXCL11,CX3CL1,CXCL12,SFRP4,SLC8A1,SLC12A2,SLC12A4,SNCA,TBX5,TRPC4,SLMAP,GPR65,STC2,RGN,HERPUD1,HEPH,LPAR6,CXCR6,CORIN,NCS1,CLIC4,NP…
20_Member	GO Biological Processes	GO:0060401	cytosolic calcium ion transport	-11.9746	-9.63134	33/182	356,477,488,493,781,801,845,857,930,931,1234,1236,1490,2247,2946,3627,3708,4283,5023,5336,5350,5788,6263,6363,6373,6376,6546,6622,8787,51393,57158,286097,406922	FASLG,ATP1A2,ATP2A2,ATP2B4,CACNA2D1,CALM1,CASQ2,CAV1,CD19,MS4A1,CCR5,CCR7,CCN2,FGF2,GSTM2,CXCL10,ITPR1,CXCL9,P2RX1,PLCG2,PLN,PTPRC,RYR3,CCL19,CXCL11,CX3CL1,SLC8A1,SNCA,RGS9,TRPV2,JPH2,MICU3,MIR133A1
20_Member	GO Biological Processes	GO:0006874	cellular calcium ion homeostasis	-11.9401	-9.60104	55/449	111,309,356,477,488,493,781,801,845,857,930,931,952,1043,1234,1236,1524,1902,1909,2247,2697,2841,2946,3627,3708,4283,5023,5336,5350,5579,5732,5788,6263,6352,6363,6373,6376,6387,6546,6622,7223,8477,8614,9104,9709,10161,10663,23413,27020,51393,57158,57419,79054,286097,406922	ADCY5,ANXA6,FASLG,ATP1A2,ATP2A2,ATP2B4,CACNA2D1,CALM1,CASQ2,CAV1,CD19,MS4A1,CD38,CD52,CCR5,CCR7,CX3CR1,LPAR1,EDNRA,FGF2,GJA1,GPR18,GSTM2,CXCL10,ITPR1,CXCL9,P2RX1,PLCG2,PLN,PRKCB,PTGER2,PTPRC,RYR3,CCL5,CCL19,CXCL11,CX3CL1,CXCL12,SLC8A1,SNCA,TRPC4,GPR65,STC2,RGN,HERPUD1,LPAR6,CXCR6,NCS1,NPTN,TRPV2,JPH2,SLC24A3,TRPM8,MICU3,MIR133A1
20_Member	GO Biological Processes	GO:0055074	calcium ion homeostasis	-11.4797	-9.1731	55/461	111,309,356,477,488,493,781,801,845,857,930,931,952,1043,1234,1236,1524,1902,1909,2247,2697,2841,2946,3627,3708,4283,5023,5336,5350,5579,5732,5788,6263,6352,6363,6373,6376,6387,6546,6622,7223,8477,8614,9104,9709,10161,10663,23413,27020,51393,57158,57419,79054,286097,406922	ADCY5,ANXA6,FASLG,ATP1A2,ATP2A2,ATP2B4,CACNA2D1,CALM1,CASQ2,CAV1,CD19,MS4A1,CD38,CD52,CCR5,CCR7,CX3CR1,LPAR1,EDNRA,FGF2,GJA1,GPR18,GSTM2,CXCL10,ITPR1,CXCL9,P2RX1,PLCG2,PLN,PRKCB,PTGER2,PTPRC,RYR3,CCL5,CCL19,CXCL11,CX3CL1,CXCL12,SLC8A1,SNCA,TRPC4,GPR65,STC2,RGN,HERPUD1,LPAR6,CXCR6,NCS1,NPTN,TRPV2,JPH2,SLC24A3,TRPM8,MICU3,MIR133A1
20_Member	GO Biological Processes	GO:0030003	cellular cation homeostasis	-11.3467	-9.05927	68/650	111,212,309,356,477,488,493,730,781,801,845,857,930,931,952,1043,1203,1234,1236,1524,1657,1902,1909,2247,2697,2841,2946,3627,3708,3778,4283,5023,5336,5350,5579,5732,5788,6263,6352,6363,6373,6376,6387,6546,6558,6622,7223,8477,8614,9104,9709,9843,10161,10663,23413,25932,27020,30061,51393,56833,57158,57419,79054,79901,120892,282679,286097,406922	ADCY5,ALAS2,ANXA6,FASLG,ATP1A2,ATP2A2,ATP2B4,C7,CACNA2D1,CALM1,CASQ2,CAV1,CD19,MS4A1,CD38,CD52,CLN5,CCR5,CCR7,CX3CR1,DMXL1,LPAR1,EDNRA,FGF2,GJA1,GPR18,GSTM2,CXCL10,ITPR1,KCNMA1,CXCL9,P2RX1,PLCG2,PLN,PRKCB,PTGER2,PTPRC,RYR3,CCL5,CCL19,CXCL11,CX3CL1,CXCL12,SLC8A1,SLC12A2,SNCA,TRPC4,GPR65,STC2,RGN,HERPUD1,HEPH,LPAR6,CXCR6,NCS1,CLIC4,NPTN,SLC40A1,TRPV2,SLAMF8,JPH2,SLC24A3,TRPM8,CYBRD1,LRRK2,AQP11,MIC…
20_Member	GO Biological Processes	GO:0098771	inorganic ion homeostasis	-11.2036	-8.94509	74/745	111,212,309,356,477,488,493,730,781,801,845,857,930,931,952,1043,1203,1234,1236,1524,1657,1902,1909,2247,2697,2841,2946,3627,3708,3778,4283,5023,5172,5336,5350,5579,5732,5788,6263,6332,6352,6363,6373,6376,6387,6424,6546,6558,6560,6622,7223,8477,8614,9104,9709,9843,10161,10663,10699,23413,25932,27020,30061,51393,56833,56898,57158,57419,79054,79901,120892,282679,286097,406922	ADCY5,ALAS2,ANXA6,FASLG,ATP1A2,ATP2A2,ATP2B4,C7,CACNA2D1,CALM1,CASQ2,CAV1,CD19,MS4A1,CD38,CD52,CLN5,CCR5,CCR7,CX3CR1,DMXL1,LPAR1,EDNRA,FGF2,GJA1,GPR18,GSTM2,CXCL10,ITPR1,KCNMA1,CXCL9,P2RX1,SLC26A4,PLCG2,PLN,PRKCB,PTGER2,PTPRC,RYR3,SCN7A,CCL5,CCL19,CXCL11,CX3CL1,CXCL12,SFRP4,SLC8A1,SLC12A2,SLC12A4,SNCA,TRPC4,GPR65,STC2,RGN,HERPUD1,HEPH,LPAR6,CXCR6,CORIN,NCS1,CLIC4,NPTN,SLC40A1,TRPV2,SLAMF8,BDH2,JP…
20_Member	GO Biological Processes	GO:0055080	cation homeostasis	-11.1694	-8.91784	73/731	111,212,309,356,477,488,493,730,781,801,845,857,930,931,952,1043,1203,1234,1236,1524,1657,1902,1909,2247,2697,2841,2946,3627,3708,3778,4283,5023,5172,5336,5350,5579,5732,5788,6263,6332,6352,6363,6373,6376,6387,6546,6558,6560,6622,7223,8477,8614,9104,9709,9843,10161,10663,10699,23413,25932,27020,30061,51393,56833,56898,57158,57419,79054,79901,120892,282679,286097,406922	ADCY5,ALAS2,ANXA6,FASLG,ATP1A2,ATP2A2,ATP2B4,C7,CACNA2D1,CALM1,CASQ2,CAV1,CD19,MS4A1,CD38,CD52,CLN5,CCR5,CCR7,CX3CR1,DMXL1,LPAR1,EDNRA,FGF2,GJA1,GPR18,GSTM2,CXCL10,ITPR1,KCNMA1,CXCL9,P2RX1,SLC26A4,PLCG2,PLN,PRKCB,PTGER2,PTPRC,RYR3,SCN7A,CCL5,CCL19,CXCL11,CX3CL1,CXCL12,SLC8A1,SLC12A2,SLC12A4,SNCA,TRPC4,GPR65,STC2,RGN,HERPUD1,HEPH,LPAR6,CXCR6,CORIN,NCS1,CLIC4,NPTN,SLC40A1,TRPV2,SLAMF8,BDH2,JPH2,SLC…
20_Member	GO Biological Processes	GO:0043269	regulation of ion transport	-10.9121	-8.60157	77/695	477,493,781,801,805,845,857,930,945,1066,1181,1536,2273,2316,2697,2824,2946,3627,3690,3745,3764,3770,3778,3779,3958,4129,4208,4283,4638,5023,5243,5321,5336,5348,5350,5354,5743,5924,6327,6332,6352,6373,6376,6387,6424,6546,6548,6558,6622,6769,7220,7349,7871,7881,8787,8832,9104,9722,10550,23072,23208,25932,30818,51393,53405,53826,54102,54106,54413,55799,57158,57657,58533,93589,196527,286183,406922	ATP1A2,ATP2B4,CACNA2D1,CALM1,CALM2,CASQ2,CAV1,CD19,CD33,CES1,CLCN2,CYBB,FHL1,FLNA,GJA1,GPM6B,GSTM2,CXCL10,ITGB3,KCNB1,KCNJ8,KCNJ14,KCNMA1,KCNMB1,LGALS3,MAOB,MEF2C,CXCL9,MYLK,P2RX1,ABCB1,PLA2G4A,PLCG2,FXYD1,PLN,PLP1,PTGS2,RASGRF2,SCN2B,SCN7A,CCL5,CXCL11,CX3CL1,CXCL12,SFRP4,SLC8A1,SLC9A1,SLC12A2,SNCA,STAC,TRPC1,UCN,SLMAP,KCNAB1,RGS9,CD84,RGN,NOS1AP,ARL6IP5,HECW1,SYT11,CLIC4,KCNIP3,TRPV2,CLIC5,FXYD6…
20_Member	GO Biological Processes	GO:0006873	cellular ion homeostasis	-10.84	-8.62486	68/667	111,212,309,356,477,488,493,730,781,801,845,857,930,931,952,1043,1203,1234,1236,1524,1657,1902,1909,2247,2697,2841,2946,3627,3708,3778,4283,5023,5336,5350,5579,5732,5788,6263,6352,6363,6373,6376,6387,6546,6558,6622,7223,8477,8614,9104,9709,9843,10161,10663,23413,25932,27020,30061,51393,56833,57158,57419,79054,79901,120892,282679,286097,406922	ADCY5,ALAS2,ANXA6,FASLG,ATP1A2,ATP2A2,ATP2B4,C7,CACNA2D1,CALM1,CASQ2,CAV1,CD19,MS4A1,CD38,CD52,CLN5,CCR5,CCR7,CX3CR1,DMXL1,LPAR1,EDNRA,FGF2,GJA1,GPR18,GSTM2,CXCL10,ITPR1,KCNMA1,CXCL9,P2RX1,PLCG2,PLN,PRKCB,PTGER2,PTPRC,RYR3,CCL5,CCL19,CXCL11,CX3CL1,CXCL12,SLC8A1,SLC12A2,SNCA,TRPC4,GPR65,STC2,RGN,HERPUD1,HEPH,LPAR6,CXCR6,NCS1,CLIC4,NPTN,SLC40A1,TRPV2,SLAMF8,JPH2,SLC24A3,TRPM8,CYBRD1,LRRK2,AQP11,MIC…
20_Member	GO Biological Processes	GO:0006875	cellular metal ion homeostasis	-10.7241	-8.52446	62/582	111,212,309,356,477,488,493,730,781,801,845,857,930,931,952,1043,1234,1236,1524,1902,1909,2247,2697,2841,2946,3627,3708,3778,4283,5023,5336,5350,5579,5732,5788,6263,6352,6363,6373,6376,6387,6546,6558,6622,7223,8477,8614,9104,9709,9843,10161,10663,23413,27020,30061,51393,57158,57419,79054,79901,286097,406922	ADCY5,ALAS2,ANXA6,FASLG,ATP1A2,ATP2A2,ATP2B4,C7,CACNA2D1,CALM1,CASQ2,CAV1,CD19,MS4A1,CD38,CD52,CCR5,CCR7,CX3CR1,LPAR1,EDNRA,FGF2,GJA1,GPR18,GSTM2,CXCL10,ITPR1,KCNMA1,CXCL9,P2RX1,PLCG2,PLN,PRKCB,PTGER2,PTPRC,RYR3,CCL5,CCL19,CXCL11,CX3CL1,CXCL12,SLC8A1,SLC12A2,SNCA,TRPC4,GPR65,STC2,RGN,HERPUD1,HEPH,LPAR6,CXCR6,NCS1,NPTN,SLC40A1,TRPV2,JPH2,SLC24A3,TRPM8,CYBRD1,MICU3,MIR133A1
20_Member	GO Biological Processes	GO:0060402	calcium ion transport into cytosol	-10.6023	-8.4161	29/160	356,477,493,781,801,845,857,930,931,1234,1236,2247,2946,3627,3708,4283,5023,5336,5350,5788,6263,6363,6373,6376,6546,6622,51393,57158,406922	FASLG,ATP1A2,ATP2B4,CACNA2D1,CALM1,CASQ2,CAV1,CD19,MS4A1,CCR5,CCR7,FGF2,GSTM2,CXCL10,ITPR1,CXCL9,P2RX1,PLCG2,PLN,PTPRC,RYR3,CCL19,CXCL11,CX3CL1,SLC8A1,SNCA,TRPV2,JPH2,MIR133A1
20_Member	GO Biological Processes	GO:0072503	cellular divalent inorganic cation homeostasis	-10.5438	-8.37373	55/487	111,309,356,477,488,493,781,801,845,857,930,931,952,1043,1234,1236,1524,1902,1909,2247,2697,2841,2946,3627,3708,4283,5023,5336,5350,5579,5732,5788,6263,6352,6363,6373,6376,6387,6546,6622,7223,8477,8614,9104,9709,10161,10663,23413,27020,51393,57158,57419,79054,286097,406922	ADCY5,ANXA6,FASLG,ATP1A2,ATP2A2,ATP2B4,CACNA2D1,CALM1,CASQ2,CAV1,CD19,MS4A1,CD38,CD52,CCR5,CCR7,CX3CR1,LPAR1,EDNRA,FGF2,GJA1,GPR18,GSTM2,CXCL10,ITPR1,CXCL9,P2RX1,PLCG2,PLN,PRKCB,PTGER2,PTPRC,RYR3,CCL5,CCL19,CXCL11,CX3CL1,CXCL12,SLC8A1,SNCA,TRPC4,GPR65,STC2,RGN,HERPUD1,LPAR6,CXCR6,NCS1,NPTN,TRPV2,JPH2,SLC24A3,TRPM8,MICU3,MIR133A1
20_Member	GO Biological Processes	GO:0097553	calcium ion transmembrane import into cytosol	-10.4268	-8.17183	29/142	356,477,493,781,801,805,845,930,1234,1236,2247,2946,3627,3708,4283,5023,5336,5350,5788,6263,6363,6373,6376,6546,6622,7220,51393,57158,406922	FASLG,ATP1A2,ATP2B4,CACNA2D1,CALM1,CALM2,CASQ2,CD19,CCR5,CCR7,FGF2,GSTM2,CXCL10,ITPR1,CXCL9,P2RX1,PLCG2,PLN,PTPRC,RYR3,CCL19,CXCL11,CX3CL1,SLC8A1,SNCA,TRPC1,TRPV2,JPH2,MIR133A1
20_Member	GO Biological Processes	GO:0051283	negative regulation of sequestering of calcium ion	-10.3674	-8.12268	26/116	309,356,477,801,805,845,930,1234,1236,2247,2946,3627,3708,4283,5336,5350,5788,6263,6363,6373,6376,6546,6622,7220,57158,406922	ANXA6,FASLG,ATP1A2,CALM1,CALM2,CASQ2,CD19,CCR5,CCR7,FGF2,GSTM2,CXCL10,ITPR1,CXCL9,PLCG2,PLN,PTPRC,RYR3,CCL19,CXCL11,CX3CL1,SLC8A1,SNCA,TRPC1,JPH2,MIR133A1
20_Member	GO Biological Processes	GO:0007204	positive regulation of cytosolic calcium ion concentration	-10.2568	-8.11538	42/319	111,356,477,493,781,801,845,857,930,931,952,1043,1234,1236,1524,1902,1909,2247,2697,2841,2946,3627,3708,4283,5023,5336,5350,5732,5788,6263,6363,6373,6376,6546,6622,8477,10161,10663,27020,51393,57158,406922	ADCY5,FASLG,ATP1A2,ATP2B4,CACNA2D1,CALM1,CASQ2,CAV1,CD19,MS4A1,CD38,CD52,CCR5,CCR7,CX3CR1,LPAR1,EDNRA,FGF2,GJA1,GPR18,GSTM2,CXCL10,ITPR1,CXCL9,P2RX1,PLCG2,PLN,PTGER2,PTPRC,RYR3,CCL19,CXCL11,CX3CL1,SLC8A1,SNCA,GPR65,LPAR6,CXCR6,NPTN,TRPV2,JPH2,MIR133A1
20_Member	GO Biological Processes	GO:0055065	metal ion homeostasis	-10.2039	-8.07206	66/659	111,212,309,356,477,488,493,730,781,801,845,857,930,931,952,1043,1234,1236,1524,1902,1909,2247,2697,2841,2946,3627,3708,3778,4283,5023,5336,5350,5579,5732,5788,6263,6332,6352,6363,6373,6376,6387,6546,6558,6560,6622,7223,8477,8614,9104,9709,9843,10161,10663,10699,23413,27020,30061,51393,56898,57158,57419,79054,79901,286097,406922	ADCY5,ALAS2,ANXA6,FASLG,ATP1A2,ATP2A2,ATP2B4,C7,CACNA2D1,CALM1,CASQ2,CAV1,CD19,MS4A1,CD38,CD52,CCR5,CCR7,CX3CR1,LPAR1,EDNRA,FGF2,GJA1,GPR18,GSTM2,CXCL10,ITPR1,KCNMA1,CXCL9,P2RX1,PLCG2,PLN,PRKCB,PTGER2,PTPRC,RYR3,SCN7A,CCL5,CCL19,CXCL11,CX3CL1,CXCL12,SLC8A1,SLC12A2,SLC12A4,SNCA,TRPC4,GPR65,STC2,RGN,HERPUD1,HEPH,LPAR6,CXCR6,CORIN,NCS1,NPTN,SLC40A1,TRPV2,BDH2,JPH2,SLC24A3,TRPM8,CYBRD1,MICU3,MIR133A1
20_Member	GO Biological Processes	GO:0051282	regulation of sequestering of calcium ion	-10.1907	-7.97548	26/118	309,356,477,801,805,845,930,1234,1236,2247,2946,3627,3708,4283,5336,5350,5788,6263,6363,6373,6376,6546,6622,7220,57158,406922	ANXA6,FASLG,ATP1A2,CALM1,CALM2,CASQ2,CD19,CCR5,CCR7,FGF2,GSTM2,CXCL10,ITPR1,CXCL9,PLCG2,PLN,PTPRC,RYR3,CCL19,CXCL11,CX3CL1,SLC8A1,SNCA,TRPC1,JPH2,MIR133A1
20_Member	GO Biological Processes	GO:0034762	regulation of transmembrane transport	-10.0301	-7.83955	67/590	60,477,493,781,801,805,845,857,930,1181,1536,1909,2273,2316,2697,2946,3099,3479,3627,3745,3764,3770,3778,3779,4208,4283,5023,5243,5295,5336,5348,5350,5354,5579,5924,6327,6332,6373,6376,6546,6548,6622,6769,7220,7871,7881,8787,9104,9722,10550,10580,23072,25932,30818,53405,53826,54102,54106,54413,55022,55799,57158,57657,93589,196527,388581,406922	ACTB,ATP1A2,ATP2B4,CACNA2D1,CALM1,CALM2,CASQ2,CAV1,CD19,CLCN2,CYBB,EDNRA,FHL1,FLNA,GJA1,GSTM2,HK2,IGF1,CXCL10,KCNB1,KCNJ8,KCNJ14,KCNMA1,KCNMB1,MEF2C,CXCL9,P2RX1,ABCB1,PIK3R1,PLCG2,FXYD1,PLN,PLP1,PRKCB,RASGRF2,SCN2B,SCN7A,CXCL11,CX3CL1,SLC8A1,SLC9A1,SNCA,STAC,TRPC1,SLMAP,KCNAB1,RGS9,RGN,NOS1AP,ARL6IP5,SORBS1,HECW1,CLIC4,KCNIP3,CLIC5,FXYD6,CLIC6,TLR9,NLGN3,PID1,CACNA2D3,JPH2,HCN3,CACNA2D4,ANO6,C1QT…
20_Member	GO Biological Processes	GO:0098662	inorganic cation transmembrane transport	-9.90517	-7.72935	82/799	291,309,356,477,488,493,529,781,801,805,845,857,930,1234,1236,1346,2247,2273,2316,2621,2823,2946,3627,3708,3745,3764,3770,3778,3779,3782,4283,4508,4512,4513,4540,5023,5336,5348,5350,5354,5788,6263,6327,6332,6363,6373,6376,6546,6548,6558,6560,6565,6575,6622,6769,6948,7220,7223,7871,7881,8787,9104,9722,10060,10343,23072,23413,30061,30818,51393,53826,54106,55799,57158,57185,57419,57657,79054,93589,1…	SLC25A4,ANXA6,FASLG,ATP1A2,ATP2A2,ATP2B4,ATP6V1E1,CACNA2D1,CALM1,CALM2,CASQ2,CAV1,CD19,CCR5,CCR7,COX7A1,FGF2,FHL1,FLNA,GAS6,GPM6A,GSTM2,CXCL10,ITPR1,KCNB1,KCNJ8,KCNJ14,KCNMA1,KCNMB1,KCNN3,CXCL9,ATP6,COX1,COX2,ND5,P2RX1,PLCG2,FXYD1,PLN,PLP1,PTPRC,RYR3,SCN2B,SCN7A,CCL19,CXCL11,CX3CL1,SLC8A1,SLC9A1,SLC12A2,SLC12A4,SLC15A2,SLC20A2,SNCA,STAC,TCN2,TRPC1,TRPC4,SLMAP,KCNAB1,RGS9,RGN,NOS1AP,ABCC9,PKDREJ,H…
20_Member	GO Biological Processes	GO:0051480	regulation of cytosolic calcium ion concentration	-9.88531	-7.78382	44/354	111,356,477,493,781,801,845,857,930,931,952,1043,1234,1236,1524,1902,1909,2247,2697,2841,2946,3627,3708,4283,5023,5336,5350,5732,5788,6263,6363,6373,6376,6546,6622,7223,8477,10161,10663,23413,27020,51393,57158,406922	ADCY5,FASLG,ATP1A2,ATP2B4,CACNA2D1,CALM1,CASQ2,CAV1,CD19,MS4A1,CD38,CD52,CCR5,CCR7,CX3CR1,LPAR1,EDNRA,FGF2,GJA1,GPR18,GSTM2,CXCL10,ITPR1,CXCL9,P2RX1,PLCG2,PLN,PTGER2,PTPRC,RYR3,CCL19,CXCL11,CX3CL1,SLC8A1,SNCA,TRPC4,GPR65,LPAR6,CXCR6,NCS1,NPTN,TRPV2,JPH2,MIR133A1
20_Member	GO Biological Processes	GO:0051208	sequestering of calcium ion	-9.84944	-7.68222	26/122	309,356,477,801,805,845,930,1234,1236,2247,2946,3627,3708,4283,5336,5350,5788,6263,6363,6373,6376,6546,6622,7220,57158,406922	ANXA6,FASLG,ATP1A2,CALM1,CALM2,CASQ2,CD19,CCR5,CCR7,FGF2,GSTM2,CXCL10,ITPR1,CXCL9,PLCG2,PLN,PTPRC,RYR3,CCL19,CXCL11,CX3CL1,SLC8A1,SNCA,TRPC1,JPH2,MIR133A1
20_Member	GO Biological Processes	GO:0072507	divalent inorganic cation homeostasis	-9.84435	-7.75012	55/508	111,309,356,477,488,493,781,801,845,857,930,931,952,1043,1234,1236,1524,1902,1909,2247,2697,2841,2946,3627,3708,4283,5023,5336,5350,5579,5732,5788,6263,6352,6363,6373,6376,6387,6546,6622,7223,8477,8614,9104,9709,10161,10663,23413,27020,51393,57158,57419,79054,286097,406922	ADCY5,ANXA6,FASLG,ATP1A2,ATP2A2,ATP2B4,CACNA2D1,CALM1,CASQ2,CAV1,CD19,MS4A1,CD38,CD52,CCR5,CCR7,CX3CR1,LPAR1,EDNRA,FGF2,GJA1,GPR18,GSTM2,CXCL10,ITPR1,CXCL9,P2RX1,PLCG2,PLN,PRKCB,PTGER2,PTPRC,RYR3,CCL5,CCL19,CXCL11,CX3CL1,CXCL12,SLC8A1,SNCA,TRPC4,GPR65,STC2,RGN,HERPUD1,LPAR6,CXCR6,NCS1,NPTN,TRPV2,JPH2,SLC24A3,TRPM8,MICU3,MIR133A1
20_Member	GO Biological Processes	GO:0051209	release of sequestered calcium ion into cytosol	-9.69214	-7.54163	25/115	356,477,801,805,845,930,1234,1236,2247,2946,3627,3708,4283,5336,5350,5788,6263,6363,6373,6376,6546,6622,7220,57158,406922	FASLG,ATP1A2,CALM1,CALM2,CASQ2,CD19,CCR5,CCR7,FGF2,GSTM2,CXCL10,ITPR1,CXCL9,PLCG2,PLN,PTPRC,RYR3,CCL19,CXCL11,CX3CL1,SLC8A1,SNCA,TRPC1,JPH2,MIR133A1
20_Member	GO Biological Processes	GO:0051651	maintenance of location in cell	-9.42232	-7.35821	32/213	309,356,477,801,845,857,930,1234,1236,2247,2697,2934,2946,3099,3627,3708,4283,5336,5350,5552,5788,6263,6363,6373,6376,6546,6622,11015,55704,57158,64714,406922	ANXA6,FASLG,ATP1A2,CALM1,CASQ2,CAV1,CD19,CCR5,CCR7,FGF2,GJA1,GSN,GSTM2,HK2,CXCL10,ITPR1,CXCL9,PLCG2,PLN,SRGN,PTPRC,RYR3,CCL19,CXCL11,CX3CL1,SLC8A1,SNCA,KDELR3,CCDC88A,JPH2,PDIA2,MIR133A1
20_Member	GO Biological Processes	GO:0051928	positive regulation of calcium ion transport	-9.11657	-7.04111	25/122	781,801,805,857,930,2946,3627,3958,4283,4638,5023,5336,5354,6352,6373,6376,6387,6548,6622,6769,7220,7349,9104,51393,57158	CACNA2D1,CALM1,CALM2,CAV1,CD19,GSTM2,CXCL10,LGALS3,CXCL9,MYLK,P2RX1,PLCG2,PLP1,CCL5,CXCL11,CX3CL1,CXCL12,SLC9A1,SNCA,STAC,TRPC1,UCN,RGN,TRPV2,JPH2
20_Member	GO Biological Processes	GO:0034765	regulation of ion transmembrane transport	-8.98166	-6.92422	57/491	477,493,781,801,805,845,857,930,1181,1536,2273,2316,2946,3627,3745,3764,3770,3778,3779,4208,4283,5023,5243,5336,5348,5350,5354,5924,6327,6332,6373,6376,6546,6548,6622,6769,7220,7871,7881,8787,9104,9722,10550,23072,25932,30818,53405,53826,54102,54106,54413,55799,57158,57657,93589,196527,406922	ATP1A2,ATP2B4,CACNA2D1,CALM1,CALM2,CASQ2,CAV1,CD19,CLCN2,CYBB,FHL1,FLNA,GSTM2,CXCL10,KCNB1,KCNJ8,KCNJ14,KCNMA1,KCNMB1,MEF2C,CXCL9,P2RX1,ABCB1,PLCG2,FXYD1,PLN,PLP1,RASGRF2,SCN2B,SCN7A,CXCL11,CX3CL1,SLC8A1,SLC9A1,SNCA,STAC,TRPC1,SLMAP,KCNAB1,RGS9,RGN,NOS1AP,ARL6IP5,HECW1,CLIC4,KCNIP3,CLIC5,FXYD6,CLIC6,TLR9,NLGN3,CACNA2D3,JPH2,HCN3,CACNA2D4,ANO6,MIR133A1
20_Member	GO Biological Processes	GO:0010959	regulation of metal ion transport	-8.81881	-6.78287	50/406	477,493,781,801,805,845,857,930,945,2273,2316,2697,2946,3627,3779,3958,4283,4638,5023,5336,5348,5350,5354,5743,6327,6352,6373,6376,6387,6546,6548,6622,6769,7220,7349,7871,7881,8787,8832,9104,9722,23072,30818,51393,53826,54106,57158,196527,286183,406922	ATP1A2,ATP2B4,CACNA2D1,CALM1,CALM2,CASQ2,CAV1,CD19,CD33,FHL1,FLNA,GJA1,GSTM2,CXCL10,KCNMB1,LGALS3,CXCL9,MYLK,P2RX1,PLCG2,FXYD1,PLN,PLP1,PTGS2,SCN2B,CCL5,CXCL11,CX3CL1,CXCL12,SLC8A1,SLC9A1,SNCA,STAC,TRPC1,UCN,SLMAP,KCNAB1,RGS9,CD84,RGN,NOS1AP,HECW1,KCNIP3,TRPV2,FXYD6,TLR9,JPH2,ANO6,NKAIN3,MIR133A1
20_Member	GO Biological Processes	GO:0051235	maintenance of location	-8.61568	-6.61207	43/325	309,356,477,801,805,845,857,930,1066,1234,1236,2200,2247,2316,2697,2934,2946,3074,3099,3627,3690,3708,4052,4283,5336,5350,5552,5788,6263,6363,6373,6376,6546,6622,6646,7220,11015,55704,57158,60526,64714,134429,406922	ANXA6,FASLG,ATP1A2,CALM1,CALM2,CASQ2,CAV1,CD19,CES1,CCR5,CCR7,FBN1,FGF2,FLNA,GJA1,GSN,GSTM2,HEXB,HK2,CXCL10,ITGB3,ITPR1,LTBP1,CXCL9,PLCG2,PLN,SRGN,PTPRC,RYR3,CCL19,CXCL11,CX3CL1,SLC8A1,SNCA,SOAT1,TRPC1,KDELR3,CCDC88A,JPH2,LDAH,PDIA2,STARD4,MIR133A1
20_Member	GO Biological Processes	GO:0051924	regulation of calcium ion transport	-8.59975	-6.59954	37/255	477,781,801,805,845,857,930,945,2697,2946,3627,3958,4283,4638,5023,5336,5350,5354,5743,6352,6373,6376,6387,6546,6548,6622,6769,7220,7349,8787,8832,9104,9722,51393,54106,57158,406922	ATP1A2,CACNA2D1,CALM1,CALM2,CASQ2,CAV1,CD19,CD33,GJA1,GSTM2,CXCL10,LGALS3,CXCL9,MYLK,P2RX1,PLCG2,PLN,PLP1,PTGS2,CCL5,CXCL11,CX3CL1,CXCL12,SLC8A1,SLC9A1,SNCA,STAC,TRPC1,UCN,RGS9,CD84,RGN,NOS1AP,TRPV2,TLR9,JPH2,MIR133A1
20_Member	GO Biological Processes	GO:1904427	positive regulation of calcium ion transmembrane transport	-8.08219	-6.12473	18/73	781,801,805,930,2946,3627,4283,5023,5336,5354,6373,6376,6548,6622,6769,7220,9104,57158	CACNA2D1,CALM1,CALM2,CD19,GSTM2,CXCL10,CXCL9,P2RX1,PLCG2,PLP1,CXCL11,CX3CL1,SLC9A1,SNCA,STAC,TRPC1,RGN,JPH2
20_Member	GO Biological Processes	GO:1903169	regulation of calcium ion transmembrane transport	-7.29926	-5.42302	26/159	477,781,801,805,845,930,2946,3627,4283,5023,5336,5350,5354,6373,6376,6546,6548,6622,6769,7220,8787,9104,9722,54106,57158,406922	ATP1A2,CACNA2D1,CALM1,CALM2,CASQ2,CD19,GSTM2,CXCL10,CXCL9,P2RX1,PLCG2,PLN,PLP1,CXCL11,CX3CL1,SLC8A1,SLC9A1,SNCA,STAC,TRPC1,RGS9,RGN,NOS1AP,TLR9,JPH2,MIR133A1
20_Member	GO Biological Processes	GO:0043270	positive regulation of ion transport	-7.20534	-5.34057	36/275	781,801,805,857,930,2273,2316,2946,3627,3779,3958,4283,4638,5023,5243,5321,5336,5348,5354,6352,6373,6376,6387,6548,6558,6622,6769,7220,7349,8787,9104,9722,51393,54413,57158,196527	CACNA2D1,CALM1,CALM2,CAV1,CD19,FHL1,FLNA,GSTM2,CXCL10,KCNMB1,LGALS3,CXCL9,MYLK,P2RX1,ABCB1,PLA2G4A,PLCG2,FXYD1,PLP1,CCL5,CXCL11,CX3CL1,CXCL12,SLC9A1,SLC12A2,SNCA,STAC,TRPC1,UCN,RGS9,RGN,NOS1AP,TRPV2,NLGN3,JPH2,ANO6
20_Member	GO Biological Processes	GO:1904064	positive regulation of cation transmembrane transport	-7.15318	-5.30076	25/151	781,801,805,930,2316,2946,3627,3779,4283,5023,5336,5348,5354,6373,6376,6548,6622,6769,7220,8787,9104,9722,54413,57158,196527	CACNA2D1,CALM1,CALM2,CD19,FLNA,GSTM2,CXCL10,KCNMB1,CXCL9,P2RX1,PLCG2,FXYD1,PLP1,CXCL11,CX3CL1,SLC9A1,SNCA,STAC,TRPC1,RGS9,RGN,NOS1AP,NLGN3,JPH2,ANO6
20_Member	GO Biological Processes	GO:1904062	regulation of cation transmembrane transport	-6.95274	-5.11802	42/357	477,493,781,801,805,845,857,930,2273,2316,2946,3627,3779,4208,4283,5023,5336,5348,5350,5354,5924,6327,6373,6376,6546,6548,6622,6769,7220,7871,7881,8787,9104,9722,23072,30818,53826,54106,54413,57158,196527,406922	ATP1A2,ATP2B4,CACNA2D1,CALM1,CALM2,CASQ2,CAV1,CD19,FHL1,FLNA,GSTM2,CXCL10,KCNMB1,MEF2C,CXCL9,P2RX1,PLCG2,FXYD1,PLN,PLP1,RASGRF2,SCN2B,CXCL11,CX3CL1,SLC8A1,SLC9A1,SNCA,STAC,TRPC1,SLMAP,KCNAB1,RGS9,RGN,NOS1AP,HECW1,KCNIP3,FXYD6,TLR9,NLGN3,JPH2,ANO6,MIR133A1
20_Member	GO Biological Processes	GO:0034767	positive regulation of ion transmembrane transport	-6.859	-5.03601	26/167	781,801,805,930,2316,2946,3627,3779,4283,5023,5243,5336,5348,5354,6373,6376,6548,6622,6769,7220,8787,9104,9722,54413,57158,196527	CACNA2D1,CALM1,CALM2,CD19,FLNA,GSTM2,CXCL10,KCNMB1,CXCL9,P2RX1,ABCB1,PLCG2,FXYD1,PLP1,CXCL11,CX3CL1,SLC9A1,SNCA,STAC,TRPC1,RGS9,RGN,NOS1AP,NLGN3,JPH2,ANO6
20_Member	GO Biological Processes	GO:0034764	positive regulation of transmembrane transport	-6.54469	-4.75148	30/219	781,801,805,930,2316,2946,3479,3627,3779,4283,5023,5243,5295,5336,5348,5354,6373,6376,6548,6622,6769,7220,8787,9104,9722,10580,54413,57158,196527,388581	CACNA2D1,CALM1,CALM2,CD19,FLNA,GSTM2,IGF1,CXCL10,KCNMB1,CXCL9,P2RX1,ABCB1,PIK3R1,PLCG2,FXYD1,PLP1,CXCL11,CX3CL1,SLC9A1,SNCA,STAC,TRPC1,RGS9,RGN,NOS1AP,SORBS1,NLGN3,JPH2,ANO6,C1QTNF12
20_Member	GO Biological Processes	GO:0051279	regulation of release of sequestered calcium ion into cytosol	-6.00011	-4.26729	16/79	477,801,805,845,930,2946,3627,4283,5350,6373,6376,6546,6622,7220,57158,406922	ATP1A2,CALM1,CALM2,CASQ2,CD19,GSTM2,CXCL10,CXCL9,PLN,CXCL11,CX3CL1,SLC8A1,SNCA,TRPC1,JPH2,MIR133A1
20_Member	GO Biological Processes	GO:0010524	positive regulation of calcium ion transport into cytosol	-5.8834	-4.16394	13/54	801,805,857,930,2946,3627,4283,5023,6373,6376,6622,7220,57158	CALM1,CALM2,CAV1,CD19,GSTM2,CXCL10,CXCL9,P2RX1,CXCL11,CX3CL1,SNCA,TRPC1,JPH2
20_Member	GO Biological Processes	GO:0010522	regulation of calcium ion transport into cytosol	-5.74486	-4.05	18/102	477,801,805,845,857,930,2946,3627,4283,5023,5350,6373,6376,6546,6622,7220,57158,406922	ATP1A2,CALM1,CALM2,CASQ2,CAV1,CD19,GSTM2,CXCL10,CXCL9,P2RX1,PLN,CXCL11,CX3CL1,SLC8A1,SNCA,TRPC1,JPH2,MIR133A1
20_Member	GO Biological Processes	GO:0051281	positive regulation of release of sequestered calcium ion into cytosol	-5.68386	-3.9947	11/40	801,805,930,2946,3627,4283,6373,6376,6622,7220,57158	CALM1,CALM2,CD19,GSTM2,CXCL10,CXCL9,CXCL11,CX3CL1,SNCA,TRPC1,JPH2
20_Member	GO Biological Processes	GO:0022898	regulation of transmembrane transporter activity	-4.8356	-3.27327	31/278	60,477,781,801,805,845,857,2273,2697,2946,4208,5243,5336,5348,5350,5924,6327,6548,6622,6769,7871,7881,8787,9104,9722,23072,53826,54106,54413,57158,406922	ACTB,ATP1A2,CACNA2D1,CALM1,CALM2,CASQ2,CAV1,FHL1,GJA1,GSTM2,MEF2C,ABCB1,PLCG2,FXYD1,PLN,RASGRF2,SCN2B,SLC9A1,SNCA,STAC,SLMAP,KCNAB1,RGS9,RGN,NOS1AP,HECW1,FXYD6,TLR9,NLGN3,JPH2,MIR133A1
20_Member	GO Biological Processes	GO:1901019	regulation of calcium ion transmembrane transporter activity	-4.41161	-2.91218	15/93	477,781,801,805,845,2946,5336,5350,6548,6769,9104,9722,54106,57158,406922	ATP1A2,CACNA2D1,CALM1,CALM2,CASQ2,GSTM2,PLCG2,PLN,SLC9A1,STAC,RGN,NOS1AP,TLR9,JPH2,MIR133A1
20_Member	GO Biological Processes	GO:0032409	regulation of transporter activity	-4.30296	-2.81496	32/310	60,477,781,801,805,845,857,2273,2697,2946,4208,5243,5336,5348,5350,5924,6327,6526,6548,6622,6769,7871,7881,8787,9104,9722,23072,53826,54106,54413,57158,406922	ACTB,ATP1A2,CACNA2D1,CALM1,CALM2,CASQ2,CAV1,FHL1,GJA1,GSTM2,MEF2C,ABCB1,PLCG2,FXYD1,PLN,RASGRF2,SCN2B,SLC5A3,SLC9A1,SNCA,STAC,SLMAP,KCNAB1,RGS9,RGN,NOS1AP,HECW1,FXYD6,TLR9,NLGN3,JPH2,MIR133A1
20_Member	GO Biological Processes	GO:1901021	positive regulation of calcium ion transmembrane transporter activity	-4.09368	-2.64104	9/39	781,801,805,2946,5336,6548,6769,9104,57158	CACNA2D1,CALM1,CALM2,GSTM2,PLCG2,SLC9A1,STAC,RGN,JPH2
20_Member	GO Biological Processes	GO:0032412	regulation of ion transmembrane transporter activity	-3.96157	-2.52874	28/267	477,781,801,805,845,857,2273,2946,4208,5243,5336,5348,5350,5924,6327,6548,6769,7871,7881,8787,9104,9722,23072,53826,54106,54413,57158,406922	ATP1A2,CACNA2D1,CALM1,CALM2,CASQ2,CAV1,FHL1,GSTM2,MEF2C,ABCB1,PLCG2,FXYD1,PLN,RASGRF2,SCN2B,SLC9A1,STAC,SLMAP,KCNAB1,RGS9,RGN,NOS1AP,HECW1,FXYD6,TLR9,NLGN3,JPH2,MIR133A1
20_Member	GO Biological Processes	GO:2001257	regulation of cation channel activity	-2.43291	-1.27368	18/184	781,801,805,845,857,2946,4208,5336,5350,5924,6769,7871,7881,8787,9722,54413,57158,406922	CACNA2D1,CALM1,CALM2,CASQ2,CAV1,GSTM2,MEF2C,PLCG2,PLN,RASGRF2,STAC,SLMAP,KCNAB1,RGS9,NOS1AP,NLGN3,JPH2,MIR133A1

## Sheet: GSE35988.KEGG
GroupID	Category	Term	Description	LogP	Log(q-value)	InTerm_InList	Genes	Symbols
1_Summary	KEGG Pathway	hsa04640	Hematopoietic cell lineage	-21.9442	-19.346	34/97	290,911,912,913,914,915,917,925,929,930,931,945,947,952,1436,1438,2322,3113,3115,3118,3119,3122,3123,3125,3126,3127,3574,3575,3676,3684,3690,3815,4254,4311,214,940,3106,3107,3134,3384,3680,3683,5788,6403,7412,8516,22829,24146,29851,54413,58494,83700,201633,257194,60,857,3908,5881,6442,6445,715,716,1675,2213,3075,3426,356,3821,3120,6414,1363,3606,4094,6775,7043,7097,8807,30009,50615,1536,1780,4360…	ANPEP,CD1C,CD1D,CD1E,CD2,CD3D,CD3G,CD8A,CD14,CD19,MS4A1,CD33,CD34,CD38,CSF1R,CSF2RA,FLT3,HLA-DPA1,HLA-DPB1,HLA-DQA2,HLA-DQB1,HLA-DRA,HLA-DRB1,HLA-DRB3,HLA-DRB4,HLA-DRB5,IL7,IL7R,ITGA4,ITGAM,ITGB3,KIT,KITLG,MME,ALCAM,CD28,HLA-B,HLA-C,HLA-F,ICAM2,ITGA9,ITGAL,PTPRC,SELP,VCAM1,ITGA8,NLGN4Y,CLDN15,ICOS,NLGN3,JAM2,JAM3,TIGIT,NEGR1,ACTB,CAV1,LAMA2,RAC3,SGCA,SGCG,C1R,C1S,CFD,FCGR2B,CFH,CFI,FASLG,KLRC1,HL…
1_Member	KEGG Pathway	hsa04640	Hematopoietic cell lineage	-21.9442	-19.346	34/97	290,911,912,913,914,915,917,925,929,930,931,945,947,952,1436,1438,2322,3113,3115,3118,3119,3122,3123,3125,3126,3127,3574,3575,3676,3684,3690,3815,4254,4311	ANPEP,CD1C,CD1D,CD1E,CD2,CD3D,CD3G,CD8A,CD14,CD19,MS4A1,CD33,CD34,CD38,CSF1R,CSF2RA,FLT3,HLA-DPA1,HLA-DPB1,HLA-DQA2,HLA-DQB1,HLA-DRA,HLA-DRB1,HLA-DRB3,HLA-DRB4,HLA-DRB5,IL7,IL7R,ITGA4,ITGAM,ITGB3,KIT,KITLG,MME
1_Member	KEGG Pathway	ko04640	Hematopoietic cell lineage	-21.9442	-19.346	34/97	290,911,912,913,914,915,917,925,929,930,931,945,947,952,1436,1438,2322,3113,3115,3118,3119,3122,3123,3125,3126,3127,3574,3575,3676,3684,3690,3815,4254,4311	ANPEP,CD1C,CD1D,CD1E,CD2,CD3D,CD3G,CD8A,CD14,CD19,MS4A1,CD33,CD34,CD38,CSF1R,CSF2RA,FLT3,HLA-DPA1,HLA-DPB1,HLA-DQA2,HLA-DQB1,HLA-DRA,HLA-DRB1,HLA-DRB3,HLA-DRB4,HLA-DRB5,IL7,IL7R,ITGA4,ITGAM,ITGB3,KIT,KITLG,MME
1_Member	KEGG Pathway	hsa04514	Cell adhesion molecules (CAMs)	-15.9102	-13.6129	34/144	214,914,925,940,947,3106,3107,3113,3115,3118,3119,3122,3123,3125,3126,3127,3134,3384,3676,3680,3683,3684,5788,6403,7412,8516,22829,24146,29851,54413,58494,83700,201633,257194	ALCAM,CD2,CD8A,CD28,CD34,HLA-B,HLA-C,HLA-DPA1,HLA-DPB1,HLA-DQA2,HLA-DQB1,HLA-DRA,HLA-DRB1,HLA-DRB3,HLA-DRB4,HLA-DRB5,HLA-F,ICAM2,ITGA4,ITGA9,ITGAL,ITGAM,PTPRC,SELP,VCAM1,ITGA8,NLGN4Y,CLDN15,ICOS,NLGN3,JAM2,JAM3,TIGIT,NEGR1
1_Member	KEGG Pathway	ko04514	Cell adhesion molecules (CAMs)	-15.9102	-13.6129	34/144	214,914,925,940,947,3106,3107,3113,3115,3118,3119,3122,3123,3125,3126,3127,3134,3384,3676,3680,3683,3684,5788,6403,7412,8516,22829,24146,29851,54413,58494,83700,201633,257194	ALCAM,CD2,CD8A,CD28,CD34,HLA-B,HLA-C,HLA-DPA1,HLA-DPB1,HLA-DQA2,HLA-DQB1,HLA-DRA,HLA-DRB1,HLA-DRB3,HLA-DRB4,HLA-DRB5,HLA-F,ICAM2,ITGA4,ITGA9,ITGAL,ITGAM,PTPRC,SELP,VCAM1,ITGA8,NLGN4Y,CLDN15,ICOS,NLGN3,JAM2,JAM3,TIGIT,NEGR1
1_Member	KEGG Pathway	hsa05416	Viral myocarditis	-12.8604	-10.6601	20/59	60,857,940,3106,3107,3113,3115,3118,3119,3122,3123,3125,3126,3127,3134,3683,3908,5881,6442,6445	ACTB,CAV1,CD28,HLA-B,HLA-C,HLA-DPA1,HLA-DPB1,HLA-DQA2,HLA-DQB1,HLA-DRA,HLA-DRB1,HLA-DRB3,HLA-DRB4,HLA-DRB5,HLA-F,ITGAL,LAMA2,RAC3,SGCA,SGCG
1_Member	KEGG Pathway	ko05150	Staphylococcus aureus infection	-11.1903	-9.06919	18/56	715,716,1675,2213,3075,3113,3115,3118,3119,3122,3123,3125,3126,3127,3426,3683,3684,6403	C1R,C1S,CFD,FCGR2B,CFH,HLA-DPA1,HLA-DPB1,HLA-DQA2,HLA-DQB1,HLA-DRA,HLA-DRB1,HLA-DRB3,HLA-DRB4,HLA-DRB5,CFI,ITGAL,ITGAM,SELP
1_Member	KEGG Pathway	hsa05332	Graft-versus-host disease	-10.3525	-8.35628	15/41	356,940,3106,3107,3113,3115,3118,3119,3122,3123,3125,3126,3127,3134,3821	FASLG,CD28,HLA-B,HLA-C,HLA-DPA1,HLA-DPB1,HLA-DQA2,HLA-DQB1,HLA-DRA,HLA-DRB1,HLA-DRB3,HLA-DRB4,HLA-DRB5,HLA-F,KLRC1
1_Member	KEGG Pathway	ko05332	Graft-versus-host disease	-10.3525	-8.35628	15/41	356,940,3106,3107,3113,3115,3118,3119,3122,3123,3125,3126,3127,3134,3821	FASLG,CD28,HLA-B,HLA-C,HLA-DPA1,HLA-DPB1,HLA-DQA2,HLA-DQB1,HLA-DRA,HLA-DRB1,HLA-DRB3,HLA-DRB4,HLA-DRB5,HLA-F,KLRC1
1_Member	KEGG Pathway	hsa05150	Staphylococcus aureus infection	-10.122	-8.19793	20/80	715,716,1675,2213,3075,3113,3115,3118,3119,3120,3122,3123,3125,3126,3127,3426,3683,3684,6403,6414	C1R,C1S,CFD,FCGR2B,CFH,HLA-DPA1,HLA-DPB1,HLA-DQA2,HLA-DQB1,HLA-DQB2,HLA-DRA,HLA-DRB1,HLA-DRB3,HLA-DRB4,HLA-DRB5,CFI,ITGAL,ITGAM,SELP,SELENOP
1_Member	KEGG Pathway	hsa04940	Type I diabetes mellitus	-10.0085	-8.19793	15/43	356,940,1363,3106,3107,3113,3115,3118,3119,3122,3123,3125,3126,3127,3134	FASLG,CD28,CPE,HLA-B,HLA-C,HLA-DPA1,HLA-DPB1,HLA-DQA2,HLA-DQB1,HLA-DRA,HLA-DRB1,HLA-DRB3,HLA-DRB4,HLA-DRB5,HLA-F
1_Member	KEGG Pathway	ko04940	Type I diabetes mellitus	-10.0085	-8.19793	15/43	356,940,1363,3106,3107,3113,3115,3118,3119,3122,3123,3125,3126,3127,3134	FASLG,CD28,CPE,HLA-B,HLA-C,HLA-DPA1,HLA-DPB1,HLA-DQA2,HLA-DQB1,HLA-DRA,HLA-DRB1,HLA-DRB3,HLA-DRB4,HLA-DRB5,HLA-F
1_Member	KEGG Pathway	hsa05330	Allograft rejection	-9.75042	-8.04037	14/38	356,940,3106,3107,3113,3115,3118,3119,3122,3123,3125,3126,3127,3134	FASLG,CD28,HLA-B,HLA-C,HLA-DPA1,HLA-DPB1,HLA-DQA2,HLA-DQB1,HLA-DRA,HLA-DRB1,HLA-DRB3,HLA-DRB4,HLA-DRB5,HLA-F
1_Member	KEGG Pathway	ko05330	Allograft rejection	-9.75042	-8.04037	14/38	356,940,3106,3107,3113,3115,3118,3119,3122,3123,3125,3126,3127,3134	FASLG,CD28,HLA-B,HLA-C,HLA-DPA1,HLA-DPB1,HLA-DQA2,HLA-DQB1,HLA-DRA,HLA-DRB1,HLA-DRB3,HLA-DRB4,HLA-DRB5,HLA-F
1_Member	KEGG Pathway	hsa05321	Inflammatory bowel disease (IBD)	-9.73553	-8.04037	18/67	3113,3115,3118,3119,3120,3122,3123,3125,3126,3127,3606,4094,6775,7043,7097,8807,30009,50615	HLA-DPA1,HLA-DPB1,HLA-DQA2,HLA-DQB1,HLA-DQB2,HLA-DRA,HLA-DRB1,HLA-DRB3,HLA-DRB4,HLA-DRB5,IL18,MAF,STAT4,TGFB3,TLR2,IL18RAP,TBX21,IL21R
1_Member	KEGG Pathway	hsa04145	Phagosome	-9.37946	-7.75894	28/168	60,715,929,1536,1780,2213,3106,3107,3113,3115,3118,3119,3120,3122,3123,3125,3126,3127,3134,3684,3690,4360,4689,7060,7097,10333,338382,728378	ACTB,C1R,CD14,CYBB,DYNC1I1,FCGR2B,HLA-B,HLA-C,HLA-DPA1,HLA-DPB1,HLA-DQA2,HLA-DQB1,HLA-DQB2,HLA-DRA,HLA-DRB1,HLA-DRB3,HLA-DRB4,HLA-DRB5,HLA-F,ITGAM,ITGB3,MRC1,NCF4,THBS4,TLR2,TLR6,RAB7B,POTEF
1_Member	KEGG Pathway	hsa05323	Rheumatoid arthritis	-9.16181	-7.56357	21/99	940,1513,3113,3115,3118,3119,3120,3122,3123,3125,3126,3127,3600,3606,3683,4050,6352,6387,7010,7043,7097	CD28,CTSK,HLA-DPA1,HLA-DPB1,HLA-DQA2,HLA-DQB1,HLA-DQB2,HLA-DRA,HLA-DRB1,HLA-DRB3,HLA-DRB4,HLA-DRB5,IL15,IL18,ITGAL,LTB,CCL5,CXCL12,TEK,TGFB3,TLR2
1_Member	KEGG Pathway	ko05323	Rheumatoid arthritis	-9.13605	-7.559	20/90	940,1513,3113,3115,3118,3119,3122,3123,3125,3126,3127,3600,3606,3683,4050,6352,6387,7010,7043,7097	CD28,CTSK,HLA-DPA1,HLA-DPB1,HLA-DQA2,HLA-DQB1,HLA-DRA,HLA-DRB1,HLA-DRB3,HLA-DRB4,HLA-DRB5,IL15,IL18,ITGAL,LTB,CCL5,CXCL12,TEK,TGFB3,TLR2
1_Member	KEGG Pathway	hsa04672	Intestinal immune network for IgA production	-9.09417	-7.55662	15/49	608,940,3113,3115,3118,3119,3122,3123,3125,3126,3127,3600,3676,6387,29851	TNFRSF17,CD28,HLA-DPA1,HLA-DPB1,HLA-DQA2,HLA-DQB1,HLA-DRA,HLA-DRB1,HLA-DRB3,HLA-DRB4,HLA-DRB5,IL15,ITGA4,CXCL12,ICOS
1_Member	KEGG Pathway	ko04672	Intestinal immune network for IgA production	-9.09417	-7.55662	15/49	608,940,3113,3115,3118,3119,3122,3123,3125,3126,3127,3600,3676,6387,29851	TNFRSF17,CD28,HLA-DPA1,HLA-DPB1,HLA-DQA2,HLA-DQB1,HLA-DRA,HLA-DRB1,HLA-DRB3,HLA-DRB4,HLA-DRB5,IL15,ITGA4,CXCL12,ICOS
1_Member	KEGG Pathway	ko05321	Inflammatory bowel disease (IBD)	-9.03209	-7.51302	17/65	3113,3115,3118,3119,3122,3123,3125,3126,3127,3606,4094,6775,7043,7097,8807,30009,50615	HLA-DPA1,HLA-DPB1,HLA-DQA2,HLA-DQB1,HLA-DRA,HLA-DRB1,HLA-DRB3,HLA-DRB4,HLA-DRB5,IL18,MAF,STAT4,TGFB3,TLR2,IL18RAP,TBX21,IL21R
1_Member	KEGG Pathway	ko04145	Phagosome	-8.88245	-7.41454	26/154	60,715,929,1536,1780,2213,3106,3107,3113,3115,3118,3119,3122,3123,3125,3126,3127,3134,3684,3690,4360,4689,7060,7097,10333,338382	ACTB,C1R,CD14,CYBB,DYNC1I1,FCGR2B,HLA-B,HLA-C,HLA-DPA1,HLA-DPB1,HLA-DQA2,HLA-DQB1,HLA-DRA,HLA-DRB1,HLA-DRB3,HLA-DRB4,HLA-DRB5,HLA-F,ITGAM,ITGB3,MRC1,NCF4,THBS4,TLR2,TLR6,RAB7B
1_Member	KEGG Pathway	hsa04658	Th1 and Th2 cell differentiation	-8.4475	-6.99538	20/98	915,917,919,3113,3115,3118,3119,3120,3122,3123,3125,3126,3127,3560,4094,5532,6775,7535,30009,84441	CD3D,CD3G,CD247,HLA-DPA1,HLA-DPB1,HLA-DQA2,HLA-DQB1,HLA-DQB2,HLA-DRA,HLA-DRB1,HLA-DRB3,HLA-DRB4,HLA-DRB5,IL2RB,MAF,PPP3CB,STAT4,ZAP70,TBX21,MAML2
1_Member	KEGG Pathway	ko04658	Th1 and Th2 cell differentiation	-8.14843	-6.71155	19/92	915,917,919,3113,3115,3118,3119,3122,3123,3125,3126,3127,3560,4094,5532,6775,7535,30009,84441	CD3D,CD3G,CD247,HLA-DPA1,HLA-DPB1,HLA-DQA2,HLA-DQB1,HLA-DRA,HLA-DRB1,HLA-DRB3,HLA-DRB4,HLA-DRB5,IL2RB,MAF,PPP3CB,STAT4,ZAP70,TBX21,MAML2
1_Member	KEGG Pathway	hsa05320	Autoimmune thyroid disease	-7.61025	-6.23183	14/53	356,940,3106,3107,3113,3115,3118,3119,3122,3123,3125,3126,3127,3134	FASLG,CD28,HLA-B,HLA-C,HLA-DPA1,HLA-DPB1,HLA-DQA2,HLA-DQB1,HLA-DRA,HLA-DRB1,HLA-DRB3,HLA-DRB4,HLA-DRB5,HLA-F
1_Member	KEGG Pathway	ko05320	Autoimmune thyroid disease	-7.61025	-6.23183	14/53	356,940,3106,3107,3113,3115,3118,3119,3122,3123,3125,3126,3127,3134	FASLG,CD28,HLA-B,HLA-C,HLA-DPA1,HLA-DPB1,HLA-DQA2,HLA-DQB1,HLA-DRA,HLA-DRB1,HLA-DRB3,HLA-DRB4,HLA-DRB5,HLA-F
1_Member	KEGG Pathway	hsa05310	Asthma	-7.58703	-6.23183	11/31	2205,2206,3113,3115,3118,3119,3122,3123,3125,3126,3127	FCER1A,MS4A2,HLA-DPA1,HLA-DPB1,HLA-DQA2,HLA-DQB1,HLA-DRA,HLA-DRB1,HLA-DRB3,HLA-DRB4,HLA-DRB5
1_Member	KEGG Pathway	ko05310	Asthma	-7.58703	-6.23183	11/31	2205,2206,3113,3115,3118,3119,3122,3123,3125,3126,3127	FCER1A,MS4A2,HLA-DPA1,HLA-DPB1,HLA-DQA2,HLA-DQB1,HLA-DRA,HLA-DRB1,HLA-DRB3,HLA-DRB4,HLA-DRB5
1_Member	KEGG Pathway	hsa05140	Leishmania infection	-7.34916	-6.06267	16/73	3113,3115,3118,3119,3122,3123,3125,3126,3127,3676,3684,4689,5579,5743,7043,7097	HLA-DPA1,HLA-DPB1,HLA-DQA2,HLA-DQB1,HLA-DRA,HLA-DRB1,HLA-DRB3,HLA-DRB4,HLA-DRB5,ITGA4,ITGAM,NCF4,PRKCB,PTGS2,TGFB3,TLR2
1_Member	KEGG Pathway	ko05140	Leishmaniasis	-7.34916	-6.06267	16/73	3113,3115,3118,3119,3122,3123,3125,3126,3127,3676,3684,4689,5579,5743,7043,7097	HLA-DPA1,HLA-DPB1,HLA-DQA2,HLA-DQB1,HLA-DRA,HLA-DRB1,HLA-DRB3,HLA-DRB4,HLA-DRB5,ITGA4,ITGAM,NCF4,PRKCB,PTGS2,TGFB3,TLR2
1_Member	KEGG Pathway	hsa04612	Antigen processing and presentation	-7.00372	-5.76859	16/77	925,972,3106,3107,3113,3115,3118,3119,3122,3123,3125,3126,3127,3134,3821,8302	CD8A,CD74,HLA-B,HLA-C,HLA-DPA1,HLA-DPB1,HLA-DQA2,HLA-DQB1,HLA-DRA,HLA-DRB1,HLA-DRB3,HLA-DRB4,HLA-DRB5,HLA-F,KLRC1,KLRC4
1_Member	KEGG Pathway	ko04612	Antigen processing and presentation	-7.00372	-5.76859	16/77	925,972,3106,3107,3113,3115,3118,3119,3122,3123,3125,3126,3127,3134,3821,8302	CD8A,CD74,HLA-B,HLA-C,HLA-DPA1,HLA-DPB1,HLA-DQA2,HLA-DQB1,HLA-DRA,HLA-DRB1,HLA-DRB3,HLA-DRB4,HLA-DRB5,HLA-F,KLRC1,KLRC4
1_Member	KEGG Pathway	hsa05164	Influenza A	-6.162	-4.97873	24/182	60,356,834,3113,3115,3118,3119,3120,3122,3123,3125,3126,3127,3606,3627,4599,5295,5579,6352,7098,8743,90865,114548,728378	ACTB,FASLG,CASP1,HLA-DPA1,HLA-DPB1,HLA-DQA2,HLA-DQB1,HLA-DQB2,HLA-DRA,HLA-DRB1,HLA-DRB3,HLA-DRB4,HLA-DRB5,IL18,CXCL10,MX1,PIK3R1,PRKCB,CCL5,TLR3,TNFSF10,IL33,NLRP3,POTEF
1_Member	KEGG Pathway	hsa04659	Th17 cell differentiation	-6.02796	-4.85296	18/112	915,917,919,3113,3115,3118,3119,3120,3122,3123,3125,3126,3127,3560,5532,7535,30009,50615	CD3D,CD3G,CD247,HLA-DPA1,HLA-DPB1,HLA-DQA2,HLA-DQB1,HLA-DQB2,HLA-DRA,HLA-DRB1,HLA-DRB3,HLA-DRB4,HLA-DRB5,IL2RB,PPP3CB,ZAP70,TBX21,IL21R
1_Member	KEGG Pathway	ko04659	Th17 cell differentiation	-5.65763	-4.52178	17/107	915,917,919,3113,3115,3118,3119,3122,3123,3125,3126,3127,3560,5532,7535,30009,50615	CD3D,CD3G,CD247,HLA-DPA1,HLA-DPB1,HLA-DQA2,HLA-DQB1,HLA-DRA,HLA-DRB1,HLA-DRB3,HLA-DRB4,HLA-DRB5,IL2RB,PPP3CB,ZAP70,TBX21,IL21R
1_Member	KEGG Pathway	ko05164	Influenza A	-5.4395	-4.33262	22/173	60,356,834,3113,3115,3118,3119,3122,3123,3125,3126,3127,3606,3627,4599,5295,5579,6352,7098,8743,90865,114548	ACTB,FASLG,CASP1,HLA-DPA1,HLA-DPB1,HLA-DQA2,HLA-DQB1,HLA-DRA,HLA-DRB1,HLA-DRB3,HLA-DRB4,HLA-DRB5,IL18,CXCL10,MX1,PIK3R1,PRKCB,CCL5,TLR3,TNFSF10,IL33,NLRP3
1_Member	KEGG Pathway	hsa05152	Tuberculosis	-5.21418	-4.13445	23/192	801,929,972,2213,3113,3115,3118,3119,3120,3122,3123,3125,3126,3127,3606,3684,4046,4360,5532,7043,7096,7097,10333	CALM1,CD14,CD74,FCGR2B,HLA-DPA1,HLA-DPB1,HLA-DQA2,HLA-DQB1,HLA-DQB2,HLA-DRA,HLA-DRB1,HLA-DRB3,HLA-DRB4,HLA-DRB5,IL18,ITGAM,LSP1,MRC1,PPP3CB,TGFB3,TLR1,TLR2,TLR6
1_Member	KEGG Pathway	ko05152	Tuberculosis	-5.20584	-4.05476	24/179	801,805,929,972,2213,3113,3115,3118,3119,3122,3123,3125,3126,3127,3606,3684,4046,4360,5532,7043,7096,7097,10333,54106	CALM1,CALM2,CD14,CD74,FCGR2B,HLA-DPA1,HLA-DPB1,HLA-DQA2,HLA-DQB1,HLA-DRA,HLA-DRB1,HLA-DRB3,HLA-DRB4,HLA-DRB5,IL18,ITGAM,LSP1,MRC1,PPP3CB,TGFB3,TLR1,TLR2,TLR6,TLR9
1_Member	KEGG Pathway	hsa05145	Toxoplasmosis	-4.56406	-3.52212	16/116	240,1234,3113,3115,3118,3119,3120,3122,3123,3125,3126,3127,3908,7043,7097,84823	ALOX5,CCR5,HLA-DPA1,HLA-DPB1,HLA-DQA2,HLA-DQB1,HLA-DQB2,HLA-DRA,HLA-DRB1,HLA-DRB3,HLA-DRB4,HLA-DRB5,LAMA2,TGFB3,TLR2,LMNB2
1_Member	KEGG Pathway	hsa05166	HTLV-I infection	-4.5127	-3.49807	26/256	111,894,915,917,3106,3107,3113,3115,3118,3119,3122,3123,3125,3126,3127,3134,3560,3600,3683,5295,5532,7043,7412,7473,8324,81029	ADCY5,CCND2,CD3D,CD3G,HLA-B,HLA-C,HLA-DPA1,HLA-DPB1,HLA-DQA2,HLA-DQB1,HLA-DRA,HLA-DRB1,HLA-DRB3,HLA-DRB4,HLA-DRB5,HLA-F,IL2RB,IL15,ITGAL,PIK3R1,PPP3CB,TGFB3,VCAM1,WNT3,FZD7,WNT5B
1_Member	KEGG Pathway	ko05166	HTLV-I infection	-4.5127	-3.49807	26/256	111,894,915,917,3106,3107,3113,3115,3118,3119,3122,3123,3125,3126,3127,3134,3560,3600,3683,5295,5532,7043,7412,7473,8324,81029	ADCY5,CCND2,CD3D,CD3G,HLA-B,HLA-C,HLA-DPA1,HLA-DPB1,HLA-DQA2,HLA-DQB1,HLA-DRA,HLA-DRB1,HLA-DRB3,HLA-DRB4,HLA-DRB5,HLA-F,IL2RB,IL15,ITGAL,PIK3R1,PPP3CB,TGFB3,VCAM1,WNT3,FZD7,WNT5B
1_Member	KEGG Pathway	hsa05322	Systemic lupus erythematosus	-4.37594	-3.39575	17/133	715,716,730,940,1511,3113,3115,3118,3119,3122,3123,3125,3126,3127,8351,8357,8358	C1R,C1S,C7,CD28,CTSG,HLA-DPA1,HLA-DPB1,HLA-DQA2,HLA-DQB1,HLA-DRA,HLA-DRB1,HLA-DRB3,HLA-DRB4,HLA-DRB5,H3C4,H3C10,H3C2
1_Member	KEGG Pathway	ko05322	Systemic lupus erythematosus	-4.37594	-3.39575	17/133	715,716,730,940,1511,3113,3115,3118,3119,3122,3123,3125,3126,3127,8351,8357,8358	C1R,C1S,C7,CD28,CTSG,HLA-DPA1,HLA-DPB1,HLA-DQA2,HLA-DQB1,HLA-DRA,HLA-DRB1,HLA-DRB3,HLA-DRB4,HLA-DRB5,H3C4,H3C10,H3C2
1_Member	KEGG Pathway	hsa05169	Epstein-Barr virus infection	-4.1776	-3.21785	28/299	695,894,915,917,919,930,952,953,3106,3107,3113,3115,3118,3119,3120,3122,3123,3125,3126,3127,3134,3316,3627,3683,5295,5336,7097,7431	BTK,CCND2,CD3D,CD3G,CD247,CD19,CD38,ENTPD1,HLA-B,HLA-C,HLA-DPA1,HLA-DPB1,HLA-DQA2,HLA-DQB1,HLA-DQB2,HLA-DRA,HLA-DRB1,HLA-DRB3,HLA-DRB4,HLA-DRB5,HLA-F,HSPB2,CXCL10,ITGAL,PIK3R1,PLCG2,TLR2,VIM
1_Member	KEGG Pathway	ko05145	Toxoplasmosis	-3.56674	-2.67607	14/113	240,1234,3113,3115,3118,3119,3122,3123,3125,3126,3127,3908,7043,7097	ALOX5,CCR5,HLA-DPA1,HLA-DPB1,HLA-DQA2,HLA-DQB1,HLA-DRA,HLA-DRB1,HLA-DRB3,HLA-DRB4,HLA-DRB5,LAMA2,TGFB3,TLR2
1_Member	KEGG Pathway	hsa05168	Herpes simplex infection	-3.52647	-2.64423	19/185	356,972,3106,3107,3113,3115,3118,3119,3122,3123,3125,3126,3127,3134,3600,6352,7097,7098,8863	FASLG,CD74,HLA-B,HLA-C,HLA-DPA1,HLA-DPB1,HLA-DQA2,HLA-DQB1,HLA-DRA,HLA-DRB1,HLA-DRB3,HLA-DRB4,HLA-DRB5,HLA-F,IL15,CCL5,TLR2,TLR3,PER3
1_Member	KEGG Pathway	ko05168	Herpes simplex infection	-3.52647	-2.64423	19/185	356,972,3106,3107,3113,3115,3118,3119,3122,3123,3125,3126,3127,3134,3600,6352,7097,7098,8863	FASLG,CD74,HLA-B,HLA-C,HLA-DPA1,HLA-DPB1,HLA-DQA2,HLA-DQB1,HLA-DRA,HLA-DRB1,HLA-DRB3,HLA-DRB4,HLA-DRB5,HLA-F,IL15,CCL5,TLR2,TLR3,PER3
1_Member	KEGG Pathway	ko05169	Epstein-Barr virus infection	-3.4979	-2.61982	20/201	930,952,953,3106,3107,3113,3115,3118,3119,3122,3123,3125,3126,3127,3134,3316,3683,5295,5336,7431	CD19,CD38,ENTPD1,HLA-B,HLA-C,HLA-DPA1,HLA-DPB1,HLA-DQA2,HLA-DQB1,HLA-DRA,HLA-DRB1,HLA-DRB3,HLA-DRB4,HLA-DRB5,HLA-F,HSPB2,ITGAL,PIK3R1,PLCG2,VIM
2_Summary	KEGG Pathway	hsa05414	Dilated cardiomyopathy	-9.98326	-8.19793	21/90	60,70,111,488,781,1674,3479,3676,3679,3680,3690,3908,5350,6442,6445,6546,7043,7169,8516,55799,93589,2697,477,493,801,805,5516,5521,6332,6548,23533,1346,4512,4513	ACTB,ACTC1,ADCY5,ATP2A2,CACNA2D1,DES,IGF1,ITGA4,ITGA7,ITGA9,ITGB3,LAMA2,PLN,SGCA,SGCG,SLC8A1,TGFB3,TPM2,ITGA8,CACNA2D3,CACNA2D4,GJA1,ATP1A2,ATP2B4,CALM1,CALM2,PPP2CB,PPP2R2B,SCN7A,SLC9A1,PIK3R5,COX7A1,COX1,COX2
2_Member	KEGG Pathway	hsa05414	Dilated cardiomyopathy	-9.98326	-8.19793	21/90	60,70,111,488,781,1674,3479,3676,3679,3680,3690,3908,5350,6442,6445,6546,7043,7169,8516,55799,93589	ACTB,ACTC1,ADCY5,ATP2A2,CACNA2D1,DES,IGF1,ITGA4,ITGA7,ITGA9,ITGB3,LAMA2,PLN,SGCA,SGCG,SLC8A1,TGFB3,TPM2,ITGA8,CACNA2D3,CACNA2D4
2_Member	KEGG Pathway	ko05414	Dilated cardiomyopathy	-9.98326	-8.19793	21/90	60,70,111,488,781,1674,3479,3676,3679,3680,3690,3908,5350,6442,6445,6546,7043,7169,8516,55799,93589	ACTB,ACTC1,ADCY5,ATP2A2,CACNA2D1,DES,IGF1,ITGA4,ITGA7,ITGA9,ITGB3,LAMA2,PLN,SGCA,SGCG,SLC8A1,TGFB3,TPM2,ITGA8,CACNA2D3,CACNA2D4
2_Member	KEGG Pathway	hsa05410	Hypertrophic cardiomyopathy (HCM)	-8.94494	-7.46064	19/83	60,70,488,781,1674,3479,3676,3679,3680,3690,3908,6442,6445,6546,7043,7169,8516,55799,93589	ACTB,ACTC1,ATP2A2,CACNA2D1,DES,IGF1,ITGA4,ITGA7,ITGA9,ITGB3,LAMA2,SGCA,SGCG,SLC8A1,TGFB3,TPM2,ITGA8,CACNA2D3,CACNA2D4
2_Member	KEGG Pathway	ko05410	Hypertrophic cardiomyopathy (HCM)	-8.94494	-7.46064	19/83	60,70,488,781,1674,3479,3676,3679,3680,3690,3908,6442,6445,6546,7043,7169,8516,55799,93589	ACTB,ACTC1,ATP2A2,CACNA2D1,DES,IGF1,ITGA4,ITGA7,ITGA9,ITGB3,LAMA2,SGCA,SGCG,SLC8A1,TGFB3,TPM2,ITGA8,CACNA2D3,CACNA2D4
2_Member	KEGG Pathway	hsa05412	Arrhythmogenic right ventricular cardiomyopathy (ARVC)	-7.43951	-6.12002	16/72	60,488,781,1674,2697,3676,3679,3680,3690,3908,6442,6445,6546,8516,55799,93589	ACTB,ATP2A2,CACNA2D1,DES,GJA1,ITGA4,ITGA7,ITGA9,ITGB3,LAMA2,SGCA,SGCG,SLC8A1,ITGA8,CACNA2D3,CACNA2D4
2_Member	KEGG Pathway	ko05412	Arrhythmogenic right ventricular cardiomyopathy (ARVC)	-7.43951	-6.12002	16/72	60,488,781,1674,2697,3676,3679,3680,3690,3908,6442,6445,6546,8516,55799,93589	ACTB,ATP2A2,CACNA2D1,DES,GJA1,ITGA4,ITGA7,ITGA9,ITGB3,LAMA2,SGCA,SGCG,SLC8A1,ITGA8,CACNA2D3,CACNA2D4
2_Member	KEGG Pathway	ko04261	Adrenergic signaling in cardiomyocytes	-3.67109	-2.73085	18/144	70,111,477,488,493,781,801,805,5350,5516,5521,6332,6546,6548,7169,23533,55799,93589	ACTC1,ADCY5,ATP1A2,ATP2A2,ATP2B4,CACNA2D1,CALM1,CALM2,PLN,PPP2CB,PPP2R2B,SCN7A,SLC8A1,SLC9A1,TPM2,PIK3R5,CACNA2D3,CACNA2D4
2_Member	KEGG Pathway	hsa04261	Adrenergic signaling in cardiomyocytes	-3.55888	-2.63733	18/147	70,111,477,488,493,781,801,805,5350,5516,5521,6332,6546,6548,7169,23533,55799,93589	ACTC1,ADCY5,ATP1A2,ATP2A2,ATP2B4,CACNA2D1,CALM1,CALM2,PLN,PPP2CB,PPP2R2B,SCN7A,SLC8A1,SLC9A1,TPM2,PIK3R5,CACNA2D3,CACNA2D4
2_Member	KEGG Pathway	hsa04260	Cardiac muscle contraction	-3.45066	-2.55139	12/78	70,477,488,781,1346,4512,4513,6546,6548,7169,55799,93589	ACTC1,ATP1A2,ATP2A2,CACNA2D1,COX7A1,COX1,COX2,SLC8A1,SLC9A1,TPM2,CACNA2D3,CACNA2D4
2_Member	KEGG Pathway	ko04260	Cardiac muscle contraction	-3.45066	-2.55139	12/78	70,477,488,781,1346,4512,4513,6546,6548,7169,55799,93589	ACTC1,ATP1A2,ATP2A2,CACNA2D1,COX7A1,COX1,COX2,SLC8A1,SLC9A1,TPM2,CACNA2D3,CACNA2D4
3_Summary	KEGG Pathway	hsa04510	Focal adhesion	-9.54905	-7.90505	31/199	60,857,894,1285,1286,1288,1291,1292,2316,2318,3082,3479,3611,3676,3679,3680,3690,3908,4638,4660,5063,5295,5579,5881,7060,7414,8516,10398,55742,56034,80310,356,930,1436,1902,1946,2247,2252,2322,2791,3560,3574,3575,3815,4068,4254,4908,5521,7010,7097,10161,54331,84823,929,2934,3071,3683,3684,8395,9899	ACTB,CAV1,CCND2,COL4A3,COL4A4,COL4A6,COL6A1,COL6A2,FLNA,FLNC,HGF,IGF1,ILK,ITGA4,ITGA7,ITGA9,ITGB3,LAMA2,MYLK,PPP1R12B,PAK3,PIK3R1,PRKCB,RAC3,THBS4,VCL,ITGA8,MYL9,PARVA,PDGFC,PDGFD,FASLG,CD19,CSF1R,LPAR1,EFNA5,FGF2,FGF7,FLT3,GNG11,IL2RB,IL7,IL7R,KIT,SH2D1A,KITLG,NTF3,PPP2R2B,TEK,TLR2,LPAR6,GNG2,LMNB2,CD14,GSN,NCKAP1L,ITGAL,ITGAM,PIP5K1B,SV2B
3_Member	KEGG Pathway	hsa04510	Focal adhesion	-9.54905	-7.90505	31/199	60,857,894,1285,1286,1288,1291,1292,2316,2318,3082,3479,3611,3676,3679,3680,3690,3908,4638,4660,5063,5295,5579,5881,7060,7414,8516,10398,55742,56034,80310	ACTB,CAV1,CCND2,COL4A3,COL4A4,COL4A6,COL6A1,COL6A2,FLNA,FLNC,HGF,IGF1,ILK,ITGA4,ITGA7,ITGA9,ITGB3,LAMA2,MYLK,PPP1R12B,PAK3,PIK3R1,PRKCB,RAC3,THBS4,VCL,ITGA8,MYL9,PARVA,PDGFC,PDGFD
3_Member	KEGG Pathway	ko04510	Focal adhesion	-9.54905	-7.90505	31/199	60,857,894,1285,1286,1288,1291,1292,2316,2318,3082,3479,3611,3676,3679,3680,3690,3908,4638,4660,5063,5295,5579,5881,7060,7414,8516,10398,55742,56034,80310	ACTB,CAV1,CCND2,COL4A3,COL4A4,COL4A6,COL6A1,COL6A2,FLNA,FLNC,HGF,IGF1,ILK,ITGA4,ITGA7,ITGA9,ITGB3,LAMA2,MYLK,PPP1R12B,PAK3,PIK3R1,PRKCB,RAC3,THBS4,VCL,ITGA8,MYL9,PARVA,PDGFC,PDGFD
3_Member	KEGG Pathway	hsa04151	PI3K-Akt signaling pathway	-7.00426	-5.76859	40/380	356,894,930,1285,1286,1288,1291,1292,1436,1902,1946,2247,2252,2322,2791,3082,3479,3560,3574,3575,3676,3679,3680,3690,3815,3908,4068,4254,4908,5295,5521,7010,7060,7097,8516,10161,54331,56034,80310,84823	FASLG,CCND2,CD19,COL4A3,COL4A4,COL4A6,COL6A1,COL6A2,CSF1R,LPAR1,EFNA5,FGF2,FGF7,FLT3,GNG11,HGF,IGF1,IL2RB,IL7,IL7R,ITGA4,ITGA7,ITGA9,ITGB3,KIT,LAMA2,SH2D1A,KITLG,NTF3,PIK3R1,PPP2R2B,TEK,THBS4,TLR2,ITGA8,LPAR6,GNG2,PDGFC,PDGFD,LMNB2
3_Member	KEGG Pathway	ko04151	PI3K-Akt signaling pathway	-6.37007	-5.15204	36/342	356,894,930,1285,1286,1288,1291,1292,1436,1902,1946,2247,2252,2791,3082,3479,3560,3574,3575,3676,3679,3680,3690,3815,3908,4254,5295,5521,7010,7060,7097,8516,10161,54331,56034,80310	FASLG,CCND2,CD19,COL4A3,COL4A4,COL4A6,COL6A1,COL6A2,CSF1R,LPAR1,EFNA5,FGF2,FGF7,GNG11,HGF,IGF1,IL2RB,IL7,IL7R,ITGA4,ITGA7,ITGA9,ITGB3,KIT,LAMA2,KITLG,PIK3R1,PPP2R2B,TEK,THBS4,TLR2,ITGA8,LPAR6,GNG2,PDGFC,PDGFD
3_Member	KEGG Pathway	hsa04810	Regulation of actin cytoskeleton	-4.51086	-3.49807	23/212	60,929,2247,2252,2934,3071,3676,3679,3680,3683,3684,3690,4638,4660,5063,5295,5881,7414,8395,8516,10398,56034,80310	ACTB,CD14,FGF2,FGF7,GSN,NCKAP1L,ITGA4,ITGA7,ITGA9,ITGAL,ITGAM,ITGB3,MYLK,PPP1R12B,PAK3,PIK3R1,RAC3,VCL,PIP5K1B,ITGA8,MYL9,PDGFC,PDGFD
3_Member	KEGG Pathway	ko04810	Regulation of actin cytoskeleton	-4.51086	-3.49807	23/212	60,929,2247,2252,2934,3071,3676,3679,3680,3683,3684,3690,4638,4660,5063,5295,5881,7414,8395,8516,10398,56034,80310	ACTB,CD14,FGF2,FGF7,GSN,NCKAP1L,ITGA4,ITGA7,ITGA9,ITGAL,ITGAM,ITGB3,MYLK,PPP1R12B,PAK3,PIK3R1,RAC3,VCL,PIP5K1B,ITGA8,MYL9,PDGFC,PDGFD
3_Member	KEGG Pathway	hsa04512	ECM-receptor interaction	-4.46119	-3.45954	13/82	1285,1286,1288,1291,1292,3676,3679,3680,3690,3908,7060,8516,9899	COL4A3,COL4A4,COL4A6,COL6A1,COL6A2,ITGA4,ITGA7,ITGA9,ITGB3,LAMA2,THBS4,ITGA8,SV2B
3_Member	KEGG Pathway	ko04512	ECM-receptor interaction	-4.46119	-3.45954	13/82	1285,1286,1288,1291,1292,3676,3679,3680,3690,3908,7060,8516,9899	COL4A3,COL4A4,COL4A6,COL6A1,COL6A2,ITGA4,ITGA7,ITGA9,ITGB3,LAMA2,THBS4,ITGA8,SV2B
4_Summary	KEGG Pathway	hsa04060	Cytokine-cytokine receptor interaction	-7.93436	-6.52644	34/270	356,608,939,1234,1236,1436,1438,1524,2322,3082,3560,3574,3575,3600,3606,3627,3815,4050,4254,4283,4352,6352,6363,6373,6376,6387,7043,8743,8807,10663,27190,50615,56034,85480,111,1794,2791,3702,5295,5579,10235,54331	FASLG,TNFRSF17,CD27,CCR5,CCR7,CSF1R,CSF2RA,CX3CR1,FLT3,HGF,IL2RB,IL7,IL7R,IL15,IL18,CXCL10,KIT,LTB,KITLG,CXCL9,MPL,CCL5,CCL19,CXCL11,CX3CL1,CXCL12,TGFB3,TNFSF10,IL18RAP,CXCR6,IL17B,IL21R,PDGFC,TSLP,ADCY5,DOCK2,GNG11,ITK,PIK3R1,PRKCB,RASGRP2,GNG2
4_Member	KEGG Pathway	hsa04060	Cytokine-cytokine receptor interaction	-7.93436	-6.52644	34/270	356,608,939,1234,1236,1436,1438,1524,2322,3082,3560,3574,3575,3600,3606,3627,3815,4050,4254,4283,4352,6352,6363,6373,6376,6387,7043,8743,8807,10663,27190,50615,56034,85480	FASLG,TNFRSF17,CD27,CCR5,CCR7,CSF1R,CSF2RA,CX3CR1,FLT3,HGF,IL2RB,IL7,IL7R,IL15,IL18,CXCL10,KIT,LTB,KITLG,CXCL9,MPL,CCL5,CCL19,CXCL11,CX3CL1,CXCL12,TGFB3,TNFSF10,IL18RAP,CXCR6,IL17B,IL21R,PDGFC,TSLP
4_Member	KEGG Pathway	ko04060	Cytokine-cytokine receptor interaction	-7.93436	-6.52644	34/270	356,608,939,1234,1236,1436,1438,1524,2322,3082,3560,3574,3575,3600,3606,3627,3815,4050,4254,4283,4352,6352,6363,6373,6376,6387,7043,8743,8807,10663,27190,50615,56034,85480	FASLG,TNFRSF17,CD27,CCR5,CCR7,CSF1R,CSF2RA,CX3CR1,FLT3,HGF,IL2RB,IL7,IL7R,IL15,IL18,CXCL10,KIT,LTB,KITLG,CXCL9,MPL,CCL5,CCL19,CXCL11,CX3CL1,CXCL12,TGFB3,TNFSF10,IL18RAP,CXCR6,IL17B,IL21R,PDGFC,TSLP
4_Member	KEGG Pathway	hsa04062	Chemokine signaling pathway	-3.61738	-2.72243	19/182	111,1234,1236,1524,1794,2791,3627,3702,4283,5295,5579,6352,6363,6373,6376,6387,10235,10663,54331	ADCY5,CCR5,CCR7,CX3CR1,DOCK2,GNG11,CXCL10,ITK,CXCL9,PIK3R1,PRKCB,CCL5,CCL19,CXCL11,CX3CL1,CXCL12,RASGRP2,CXCR6,GNG2
4_Member	KEGG Pathway	ko04062	Chemokine signaling pathway	-3.61738	-2.72243	19/182	111,1234,1236,1524,1794,2791,3627,3702,4283,5295,5579,6352,6363,6373,6376,6387,10235,10663,54331	ADCY5,CCR5,CCR7,CX3CR1,DOCK2,GNG11,CXCL10,ITK,CXCL9,PIK3R1,PRKCB,CCL5,CCL19,CXCL11,CX3CL1,CXCL12,RASGRP2,CXCR6,GNG2
5_Summary	KEGG Pathway	ko05205	Proteoglycans in cancer	-7.50075	-6.15778	28/203	60,356,857,1634,2247,2316,2318,3059,3082,3236,3316,3479,3690,3708,4060,4313,4660,5295,5336,5579,7078,7097,7473,8324,60495,81029,81578,117581,728378	ACTB,FASLG,CAV1,DCN,FGF2,FLNA,FLNC,HCLS1,HGF,HOXD10,HSPB2,IGF1,ITGB3,ITPR1,LUM,MMP2,PPP1R12B,PIK3R1,PLCG2,PRKCB,TIMP3,TLR2,WNT3,FZD7,HPSE2,WNT5B,COL21A1,TWIST2,POTEF
5_Member	KEGG Pathway	ko05205	Proteoglycans in cancer	-7.50075	-6.15778	28/203	60,356,857,1634,2247,2316,2318,3059,3082,3236,3316,3479,3690,3708,4060,4313,4660,5295,5336,5579,7078,7097,7473,8324,60495,81029,81578,117581	ACTB,FASLG,CAV1,DCN,FGF2,FLNA,FLNC,HCLS1,HGF,HOXD10,HSPB2,IGF1,ITGB3,ITPR1,LUM,MMP2,PPP1R12B,PIK3R1,PLCG2,PRKCB,TIMP3,TLR2,WNT3,FZD7,HPSE2,WNT5B,COL21A1,TWIST2
5_Member	KEGG Pathway	hsa05205	Proteoglycans in cancer	-7.39083	-6.08262	29/218	60,356,857,1634,2247,2316,2318,3059,3082,3236,3316,3479,3690,3708,4060,4313,4660,5295,5336,5579,7078,7097,7473,8324,60495,81029,81578,117581,728378	ACTB,FASLG,CAV1,DCN,FGF2,FLNA,FLNC,HCLS1,HGF,HOXD10,HSPB2,IGF1,ITGB3,ITPR1,LUM,MMP2,PPP1R12B,PIK3R1,PLCG2,PRKCB,TIMP3,TLR2,WNT3,FZD7,HPSE2,WNT5B,COL21A1,TWIST2,POTEF
6_Summary	KEGG Pathway	ko05146	Amoebiasis	-7.07008	-5.79406	18/96	384,912,929,1285,1286,1288,1511,1992,3684,3908,5272,5295,5579,7043,7097,7414,9630,338382,84823	ARG2,CD1D,CD14,COL4A3,COL4A4,COL4A6,CTSG,SERPINB1,ITGAM,LAMA2,SERPINB9,PIK3R1,PRKCB,TGFB3,TLR2,VCL,GNA14,RAB7B,LMNB2
6_Member	KEGG Pathway	ko05146	Amoebiasis	-7.07008	-5.79406	18/96	384,912,929,1285,1286,1288,1511,1992,3684,3908,5272,5295,5579,7043,7097,7414,9630,338382	ARG2,CD1D,CD14,COL4A3,COL4A4,COL4A6,CTSG,SERPINB1,ITGAM,LAMA2,SERPINB9,PIK3R1,PRKCB,TGFB3,TLR2,VCL,GNA14,RAB7B
6_Member	KEGG Pathway	hsa05146	Amoebiasis	-7.03092	-5.76859	19/107	384,912,929,1285,1286,1288,1511,1992,3684,3908,5272,5295,5579,7043,7097,7414,9630,84823,338382	ARG2,CD1D,CD14,COL4A3,COL4A4,COL4A6,CTSG,SERPINB1,ITGAM,LAMA2,SERPINB9,PIK3R1,PRKCB,TGFB3,TLR2,VCL,GNA14,LMNB2,RAB7B
7_Summary	KEGG Pathway	hsa05200	Pathways in cancer	-6.99576	-5.76859	41/395	111,356,652,1285,1286,1288,1436,1438,1902,1909,2247,2252,2322,2735,2736,2737,2791,2950,3082,3479,3815,3908,4254,4313,5295,5336,5579,5732,5743,5881,5915,6387,7043,7473,8324,9618,10161,10235,54331,64399,81029	ADCY5,FASLG,BMP4,COL4A3,COL4A4,COL4A6,CSF1R,CSF2RA,LPAR1,EDNRA,FGF2,FGF7,FLT3,GLI1,GLI2,GLI3,GNG11,GSTP1,HGF,IGF1,KIT,LAMA2,KITLG,MMP2,PIK3R1,PLCG2,PRKCB,PTGER2,PTGS2,RAC3,RARB,CXCL12,TGFB3,WNT3,FZD7,TRAF4,LPAR6,RASGRP2,GNG2,HHIP,WNT5B
7_Member	KEGG Pathway	hsa05200	Pathways in cancer	-6.99576	-5.76859	41/395	111,356,652,1285,1286,1288,1436,1438,1902,1909,2247,2252,2322,2735,2736,2737,2791,2950,3082,3479,3815,3908,4254,4313,5295,5336,5579,5732,5743,5881,5915,6387,7043,7473,8324,9618,10161,10235,54331,64399,81029	ADCY5,FASLG,BMP4,COL4A3,COL4A4,COL4A6,CSF1R,CSF2RA,LPAR1,EDNRA,FGF2,FGF7,FLT3,GLI1,GLI2,GLI3,GNG11,GSTP1,HGF,IGF1,KIT,LAMA2,KITLG,MMP2,PIK3R1,PLCG2,PRKCB,PTGER2,PTGS2,RAC3,RARB,CXCL12,TGFB3,WNT3,FZD7,TRAF4,LPAR6,RASGRP2,GNG2,HHIP,WNT5B
8_Summary	KEGG Pathway	hsa04014	Ras signaling pathway	-6.28417	-5.07509	30/259	356,801,1436,1946,2247,2252,2322,2791,3082,3479,3815,4254,4908,5063,5295,5321,5336,5579,5881,5924,7010,7535,10235,23179,54331,56034,64333,64926,80310,114787,60,111,1902,2533,3683,3684,3690,8631,54518,728378,558,2621	FASLG,CALM1,CSF1R,EFNA5,FGF2,FGF7,FLT3,GNG11,HGF,IGF1,KIT,KITLG,NTF3,PAK3,PIK3R1,PLA2G4A,PLCG2,PRKCB,RAC3,RASGRF2,TEK,ZAP70,RASGRP2,RGL1,GNG2,PDGFC,ARHGAP9,RASAL3,PDGFD,GPRIN1,ACTB,ADCY5,LPAR1,FYB1,ITGAL,ITGAM,ITGB3,SKAP1,APBB1IP,POTEF,AXL,GAS6
8_Member	KEGG Pathway	hsa04014	Ras signaling pathway	-6.28417	-5.07509	30/259	356,801,1436,1946,2247,2252,2322,2791,3082,3479,3815,4254,4908,5063,5295,5321,5336,5579,5881,5924,7010,7535,10235,23179,54331,56034,64333,64926,80310,114787	FASLG,CALM1,CSF1R,EFNA5,FGF2,FGF7,FLT3,GNG11,HGF,IGF1,KIT,KITLG,NTF3,PAK3,PIK3R1,PLA2G4A,PLCG2,PRKCB,RAC3,RASGRF2,TEK,ZAP70,RASGRP2,RGL1,GNG2,PDGFC,ARHGAP9,RASAL3,PDGFD,GPRIN1
8_Member	KEGG Pathway	hsa04015	Rap1 signaling pathway	-5.90882	-4.75774	27/228	60,111,801,1436,1902,1946,2247,2252,2533,3082,3479,3683,3684,3690,3815,4254,5295,5579,5881,7010,8631,10235,54518,56034,80310,114787,728378	ACTB,ADCY5,CALM1,CSF1R,LPAR1,EFNA5,FGF2,FGF7,FYB1,HGF,IGF1,ITGAL,ITGAM,ITGB3,KIT,KITLG,PIK3R1,PRKCB,RAC3,TEK,SKAP1,RASGRP2,APBB1IP,PDGFC,PDGFD,GPRIN1,POTEF
8_Member	KEGG Pathway	ko04015	Rap1 signaling pathway	-5.56155	-4.4408	25/210	60,111,801,1436,1902,1946,2247,2252,2533,3082,3479,3683,3684,3690,3815,4254,5295,5579,5881,7010,8631,10235,54518,56034,80310	ACTB,ADCY5,CALM1,CSF1R,LPAR1,EFNA5,FGF2,FGF7,FYB1,HGF,IGF1,ITGAL,ITGAM,ITGB3,KIT,KITLG,PIK3R1,PRKCB,RAC3,TEK,SKAP1,RASGRP2,APBB1IP,PDGFC,PDGFD
8_Member	KEGG Pathway	hsa01521	EGFR tyrosine kinase inhibitor resistance	-2.77816	-1.93579	10/79	558,2247,2621,3082,3479,5295,5336,5579,56034,80310	AXL,FGF2,GAS6,HGF,IGF1,PIK3R1,PLCG2,PRKCB,PDGFC,PDGFD
8_Member	KEGG Pathway	ko01521	EGFR tyrosine kinase inhibitor resistance	-2.77816	-1.93579	10/79	558,2247,2621,3082,3479,5295,5336,5579,56034,80310	AXL,FGF2,GAS6,HGF,IGF1,PIK3R1,PLCG2,PRKCB,PDGFC,PDGFD
9_Summary	KEGG Pathway	hsa04270	Vascular smooth muscle contraction	-6.16684	-4.97873	19/121	59,72,111,800,801,1909,3708,3778,3779,4629,4637,4638,4660,5321,5579,5592,10335,10398,94274,60,781,805,952,1191,3770,4208,5532,5743,6263,23533,55799,57172,93589,728378,291,477,488,493,3764,5350,6546,8654,683,4069,6548,6558,1359,7220,2791,2892,8863,9722,54331,114787,5023,5336,9630,84812	ACTA2,ACTG2,ADCY5,CALD1,CALM1,EDNRA,ITPR1,KCNMA1,KCNMB1,MYH11,MYL6,MYLK,PPP1R12B,PLA2G4A,PRKCB,PRKG1,IRAG1,MYL9,PPP1R14A,ACTB,CACNA2D1,CALM2,CD38,CLU,KCNJ14,MEF2C,PPP3CB,PTGS2,RYR3,PIK3R5,CACNA2D3,CAMK1G,CACNA2D4,POTEF,SLC25A4,ATP1A2,ATP2A2,ATP2B4,KCNJ8,PLN,SLC8A1,PDE5A,BST1,LYZ,SLC9A1,SLC12A2,CPA3,TRPC1,GNG11,GRIA3,PER3,NOS1AP,GNG2,GPRIN1,P2RX1,PLCG2,GNA14,PLCD4
9_Member	KEGG Pathway	hsa04270	Vascular smooth muscle contraction	-6.16684	-4.97873	19/121	59,72,111,800,801,1909,3708,3778,3779,4629,4637,4638,4660,5321,5579,5592,10335,10398,94274	ACTA2,ACTG2,ADCY5,CALD1,CALM1,EDNRA,ITPR1,KCNMA1,KCNMB1,MYH11,MYL6,MYLK,PPP1R12B,PLA2G4A,PRKCB,PRKG1,IRAG1,MYL9,PPP1R14A
9_Member	KEGG Pathway	ko04270	Vascular smooth muscle contraction	-6.16684	-4.97873	19/121	59,72,111,800,801,1909,3708,3778,3779,4629,4637,4638,4660,5321,5579,5592,10335,10398,94274	ACTA2,ACTG2,ADCY5,CALD1,CALM1,EDNRA,ITPR1,KCNMA1,KCNMB1,MYH11,MYL6,MYLK,PPP1R12B,PLA2G4A,PRKCB,PRKG1,IRAG1,MYL9,PPP1R14A
9_Member	KEGG Pathway	hsa04921	Oxytocin signaling pathway	-6.03123	-4.80406	24/161	60,111,781,801,805,952,1191,3708,3770,4208,4637,4638,4660,5321,5532,5579,5743,6263,10398,23533,55799,57172,93589,728378	ACTB,ADCY5,CACNA2D1,CALM1,CALM2,CD38,CLU,ITPR1,KCNJ14,MEF2C,MYL6,MYLK,PPP1R12B,PLA2G4A,PPP3CB,PRKCB,PTGS2,RYR3,MYL9,PIK3R5,CACNA2D3,CAMK1G,CACNA2D4,POTEF
9_Member	KEGG Pathway	ko04921	Oxytocin signaling pathway	-5.36852	-4.20961	22/152	60,111,781,801,805,952,3708,3770,4208,4637,4638,4660,5321,5532,5579,5743,6263,10398,23533,55799,57172,93589	ACTB,ADCY5,CACNA2D1,CALM1,CALM2,CD38,ITPR1,KCNJ14,MEF2C,MYL6,MYLK,PPP1R12B,PLA2G4A,PPP3CB,PRKCB,PTGS2,RYR3,MYL9,PIK3R5,CACNA2D3,CAMK1G,CACNA2D4
9_Member	KEGG Pathway	ko04022	cGMP-PKG signaling pathway	-4.87213	-3.7722	22/163	111,291,477,488,493,801,805,1909,3708,3764,3778,3779,4208,4638,5350,5532,5592,6546,8654,10335,10398,23533	ADCY5,SLC25A4,ATP1A2,ATP2A2,ATP2B4,CALM1,CALM2,EDNRA,ITPR1,KCNJ8,KCNMA1,KCNMB1,MEF2C,MYLK,PLN,PPP3CB,PRKG1,SLC8A1,PDE5A,IRAG1,MYL9,PIK3R5
9_Member	KEGG Pathway	ko04970	Salivary secretion	-4.58457	-3.5178	15/90	111,477,493,683,801,805,952,3708,3778,4069,5579,5592,6263,6548,6558	ADCY5,ATP1A2,ATP2B4,BST1,CALM1,CALM2,CD38,ITPR1,KCNMA1,LYZ,PRKCB,PRKG1,RYR3,SLC9A1,SLC12A2
9_Member	KEGG Pathway	hsa04022	cGMP-PKG signaling pathway	-4.46425	-3.41007	22/173	111,291,477,488,493,801,805,1909,3708,3764,3778,3779,4208,4638,5350,5532,5592,6546,8654,10335,10398,23533	ADCY5,SLC25A4,ATP1A2,ATP2A2,ATP2B4,CALM1,CALM2,EDNRA,ITPR1,KCNJ8,KCNMA1,KCNMB1,MEF2C,MYLK,PLN,PPP3CB,PRKG1,SLC8A1,PDE5A,IRAG1,MYL9,PIK3R5
9_Member	KEGG Pathway	hsa04970	Salivary secretion	-4.35576	-3.35411	15/94	111,477,493,683,801,805,952,3708,3778,4069,5579,5592,6263,6548,6558	ADCY5,ATP1A2,ATP2B4,BST1,CALM1,CALM2,CD38,ITPR1,KCNMA1,LYZ,PRKCB,PRKG1,RYR3,SLC9A1,SLC12A2
9_Member	KEGG Pathway	ko04972	Pancreatic secretion	-3.13972	-2.28184	13/96	111,477,488,493,683,952,1359,3708,3778,5579,6548,6558,7220	ADCY5,ATP1A2,ATP2A2,ATP2B4,BST1,CD38,CPA3,ITPR1,KCNMA1,PRKCB,SLC9A1,SLC12A2,TRPC1
9_Member	KEGG Pathway	hsa04713	circadian entrainment	-2.97108	-2.1325	13/100	111,801,805,2791,2892,3708,5579,5592,6263,8863,9722,54331,114787	ADCY5,CALM1,CALM2,GNG11,GRIA3,ITPR1,PRKCB,PRKG1,RYR3,PER3,NOS1AP,GNG2,GPRIN1
9_Member	KEGG Pathway	hsa04972	Pancreatic secretion	-2.85131	-2.02759	13/103	111,477,488,493,683,952,1359,3708,3778,5579,6548,6558,7220	ADCY5,ATP1A2,ATP2A2,ATP2B4,BST1,CD38,CPA3,ITPR1,KCNMA1,PRKCB,SLC9A1,SLC12A2,TRPC1
9_Member	KEGG Pathway	hsa04020	Calcium signaling pathway	-2.48346	-1.6914	18/182	291,488,493,801,805,952,1909,3708,4638,5023,5336,5350,5532,5579,6263,6546,9630,84812	SLC25A4,ATP2A2,ATP2B4,CALM1,CALM2,CD38,EDNRA,ITPR1,MYLK,P2RX1,PLCG2,PLN,PPP3CB,PRKCB,RYR3,SLC8A1,GNA14,PLCD4
9_Member	KEGG Pathway	ko04020	Calcium signaling pathway	-2.48346	-1.6914	18/182	291,488,493,801,805,952,1909,3708,4638,5023,5336,5350,5532,5579,6263,6546,9630,84812	SLC25A4,ATP2A2,ATP2B4,CALM1,CALM2,CD38,EDNRA,ITPR1,MYLK,P2RX1,PLCG2,PLN,PPP3CB,PRKCB,RYR3,SLC8A1,GNA14,PLCD4
10_Summary	KEGG Pathway	hsa04670	Leukocyte transendothelial migration	-5.91226	-4.75774	18/114	60,1536,3676,3683,3684,3702,4313,4689,5295,5336,5579,6387,7412,7414,10398,24146,58494,83700,1285,1286,1288,7043,84812	ACTB,CYBB,ITGA4,ITGAL,ITGAM,ITK,MMP2,NCF4,PIK3R1,PLCG2,PRKCB,CXCL12,VCAM1,VCL,MYL9,CLDN15,JAM2,JAM3,COL4A3,COL4A4,COL4A6,TGFB3,PLCD4
10_Member	KEGG Pathway	hsa04670	Leukocyte transendothelial migration	-5.91226	-4.75774	18/114	60,1536,3676,3683,3684,3702,4313,4689,5295,5336,5579,6387,7412,7414,10398,24146,58494,83700	ACTB,CYBB,ITGA4,ITGAL,ITGAM,ITK,MMP2,NCF4,PIK3R1,PLCG2,PRKCB,CXCL12,VCAM1,VCL,MYL9,CLDN15,JAM2,JAM3
10_Member	KEGG Pathway	ko04670	Leukocyte transendothelial migration	-5.91226	-4.75774	18/114	60,1536,3676,3683,3684,3702,4313,4689,5295,5336,5579,6387,7412,7414,10398,24146,58494,83700	ACTB,CYBB,ITGA4,ITGAL,ITGAM,ITK,MMP2,NCF4,PIK3R1,PLCG2,PRKCB,CXCL12,VCAM1,VCL,MYL9,CLDN15,JAM2,JAM3
10_Member	KEGG Pathway	ko04933	AGE-RAGE signaling pathway in diabetic complications	-2.54105	-1.74558	11/99	1285,1286,1288,1536,4313,5295,5336,5579,7043,7412,84812	COL4A3,COL4A4,COL4A6,CYBB,MMP2,PIK3R1,PLCG2,PRKCB,TGFB3,VCAM1,PLCD4
10_Member	KEGG Pathway	hsa04933	AGE-RAGE signaling pathway in diabetic complications	-2.2811	-1.56613	11/107	1285,1286,1288,1536,4313,5295,5336,5579,7043,7412,84812	COL4A3,COL4A4,COL4A6,CYBB,MMP2,PIK3R1,PLCG2,PRKCB,TGFB3,VCAM1,PLCD4
11_Summary	KEGG Pathway	ko05202	Transcriptional misregulation in cancer	-5.69315	-4.54975	23/180	894,929,1236,1436,2138,2313,2322,2892,3398,3479,3560,3684,4094,4208,4211,5087,6935,8351,8357,8358,8842,51513,85414	CCND2,CD14,CCR7,CSF1R,EYA1,FLI1,FLT3,GRIA3,ID2,IGF1,IL2RB,ITGAM,MAF,MEF2C,MEIS1,PBX1,ZEB1,H3C4,H3C10,H3C2,PROM1,ETV7,SLC45A3
11_Member	KEGG Pathway	ko05202	Transcriptional misregulation in cancer	-5.69315	-4.54975	23/180	894,929,1236,1436,2138,2313,2322,2892,3398,3479,3560,3684,4094,4208,4211,5087,6935,8351,8357,8358,8842,51513,85414	CCND2,CD14,CCR7,CSF1R,EYA1,FLI1,FLT3,GRIA3,ID2,IGF1,IL2RB,ITGAM,MAF,MEF2C,MEIS1,PBX1,ZEB1,H3C4,H3C10,H3C2,PROM1,ETV7,SLC45A3
11_Member	KEGG Pathway	hsa05202	Transcriptional misregulation in cancer	-4.77916	-3.72498	23/204	894,929,1236,1436,2138,2313,2322,2892,3398,3479,3560,3684,4094,4208,4211,5087,6935,8351,8357,8358,8842,51513,85414	CCND2,CD14,CCR7,CSF1R,EYA1,FLI1,FLT3,GRIA3,ID2,IGF1,IL2RB,ITGAM,MAF,MEF2C,MEIS1,PBX1,ZEB1,H3C4,H3C10,H3C2,PROM1,ETV7,SLC45A3
12_Summary	KEGG Pathway	hsa00190	Oxidative phosphorylation	-5.55475	-4.4408	8/133	529,4508,4512,4513,4536,4537,4540,4541,291	ATP6V1E1,ATP6,COX1,COX2,ND2,ND3,ND5,ND6,SLC25A4
12_Member	KEGG Pathway	hsa00190	Oxidative phosphorylation	-5.55475	-4.4408	8/133	529,4508,4512,4513,4536,4537,4540,4541	ATP6V1E1,ATP6,COX1,COX2,ND2,ND3,ND5,ND6
12_Member	KEGG Pathway	ko00190	Oxidative phosphorylation	-5.55475	-4.4408	8/133	529,4508,4512,4513,4536,4537,4540,4541	ATP6V1E1,ATP6,COX1,COX2,ND2,ND3,ND5,ND6
12_Member	KEGG Pathway	hsa05012	Parkinson's disease	-5.3429	-4.24981	8/142	291,4508,4512,4513,4536,4537,4540,4541	SLC25A4,ATP6,COX1,COX2,ND2,ND3,ND5,ND6
13_Summary	KEGG Pathway	ko04974	Protein digestion and absorption	-5.32924	-4.24288	15/90	477,1285,1286,1288,1291,1292,1305,1306,1359,1803,4311,6546,7373,81578,169044	ATP1A2,COL4A3,COL4A4,COL4A6,COL6A1,COL6A2,COL13A1,COL15A1,CPA3,DPP4,MME,SLC8A1,COL14A1,COL21A1,COL22A1
13_Member	KEGG Pathway	ko04974	Protein digestion and absorption	-5.32924	-4.24288	15/90	477,1285,1286,1288,1291,1292,1305,1306,1359,1803,4311,6546,7373,81578,169044	ATP1A2,COL4A3,COL4A4,COL4A6,COL6A1,COL6A2,COL13A1,COL15A1,CPA3,DPP4,MME,SLC8A1,COL14A1,COL21A1,COL22A1
13_Member	KEGG Pathway	hsa04974	Protein digestion and absorption	-5.08969	-4.02293	15/94	477,1285,1286,1288,1291,1292,1305,1306,1359,1803,4311,6546,7373,81578,169044	ATP1A2,COL4A3,COL4A4,COL4A6,COL6A1,COL6A2,COL13A1,COL15A1,CPA3,DPP4,MME,SLC8A1,COL14A1,COL21A1,COL22A1
14_Summary	KEGG Pathway	hsa05418	Fluid shear stress and atherosclerosis	-5.01745	-3.91057	21/148	60,652,801,805,857,1536,1843,2941,2944,2946,2947,2948,2949,2950,3690,4208,4313,5295,5881,7412,728378,290,3417,128,316,4129,1066,1806,7371,3290,5743	ACTB,BMP4,CALM1,CALM2,CAV1,CYBB,DUSP1,GSTA4,GSTM1,GSTM2,GSTM3,GSTM4,GSTM5,GSTP1,ITGB3,MEF2C,MMP2,PIK3R1,RAC3,VCAM1,POTEF,ANPEP,IDH1,ADH5,AOX1,MAOB,CES1,DPYD,UCK2,HSD11B1,PTGS2
14_Member	KEGG Pathway	hsa05418	Fluid shear stress and atherosclerosis	-5.01745	-3.91057	21/148	60,652,801,805,857,1536,1843,2941,2944,2946,2947,2948,2949,2950,3690,4208,4313,5295,5881,7412,728378	ACTB,BMP4,CALM1,CALM2,CAV1,CYBB,DUSP1,GSTA4,GSTM1,GSTM2,GSTM3,GSTM4,GSTM5,GSTP1,ITGB3,MEF2C,MMP2,PIK3R1,RAC3,VCAM1,POTEF
14_Member	KEGG Pathway	ko05418	Fluid shear stress and atherosclerosis	-4.76083	-3.67447	20/142	60,652,801,805,857,1536,1843,2941,2944,2946,2947,2948,2949,2950,3690,4208,4313,5295,5881,7412	ACTB,BMP4,CALM1,CALM2,CAV1,CYBB,DUSP1,GSTA4,GSTM1,GSTM2,GSTM3,GSTM4,GSTM5,GSTP1,ITGB3,MEF2C,MMP2,PIK3R1,RAC3,VCAM1
14_Member	KEGG Pathway	hsa00480	Glutathione metabolism	-2.97706	-2.13469	9/54	290,2941,2944,2946,2947,2948,2949,2950,3417	ANPEP,GSTA4,GSTM1,GSTM2,GSTM3,GSTM4,GSTM5,GSTP1,IDH1
14_Member	KEGG Pathway	ko00480	Glutathione metabolism	-2.97706	-2.13469	9/54	290,2941,2944,2946,2947,2948,2949,2950,3417	ANPEP,GSTA4,GSTM1,GSTM2,GSTM3,GSTM4,GSTM5,GSTP1,IDH1
14_Member	KEGG Pathway	hsa00982	Drug metabolism - cytochrome P450	-2.71668	-1.90731	10/70	128,316,2941,2944,2946,2947,2948,2949,2950,4129	ADH5,AOX1,GSTA4,GSTM1,GSTM2,GSTM3,GSTM4,GSTM5,GSTP1,MAOB
14_Member	KEGG Pathway	ko00982	Drug metabolism - cytochrome P450	-2.71668	-1.90731	10/70	128,316,2941,2944,2946,2947,2948,2949,2950,4129	ADH5,AOX1,GSTA4,GSTM1,GSTM2,GSTM3,GSTM4,GSTM5,GSTP1,MAOB
14_Member	KEGG Pathway	hsanan01	drug metabolism	-2.43198	-1.66304	12/117	128,316,1066,1806,2944,2946,2947,2948,2949,2950,4129,7371	ADH5,AOX1,CES1,DPYD,GSTM1,GSTM2,GSTM3,GSTM4,GSTM5,GSTP1,MAOB,UCK2
14_Member	KEGG Pathway	ko05204	Chemical carcinogenesis	-2.21082	-1.46991	10/82	128,2941,2944,2946,2947,2948,2949,2950,3290,5743	ADH5,GSTA4,GSTM1,GSTM2,GSTM3,GSTM4,GSTM5,GSTP1,HSD11B1,PTGS2
15_Summary	KEGG Pathway	hsa04360	Axon guidance	-4.38715	-3.36869	22/175	1073,1808,1946,2044,3611,5063,5295,5336,5361,5532,5881,6387,7220,7223,8633,9353,10371,10512,80031,81029,91653,137970	CFL2,DPYSL2,EFNA5,EPHA5,ILK,PAK3,PIK3R1,PLCG2,PLXNA1,PPP3CB,RAC3,CXCL12,TRPC1,TRPC4,UNC5C,SLIT2,SEMA3A,SEMA3C,SEMA6D,WNT5B,BOC,UNC5D
15_Member	KEGG Pathway	hsa04360	Axon guidance	-4.38715	-3.36869	22/175	1073,1808,1946,2044,3611,5063,5295,5336,5361,5532,5881,6387,7220,7223,8633,9353,10371,10512,80031,81029,91653,137970	CFL2,DPYSL2,EFNA5,EPHA5,ILK,PAK3,PIK3R1,PLCG2,PLXNA1,PPP3CB,RAC3,CXCL12,TRPC1,TRPC4,UNC5C,SLIT2,SEMA3A,SEMA3C,SEMA6D,WNT5B,BOC,UNC5D
15_Member	KEGG Pathway	ko04360	Axon guidance	-4.38715	-3.36869	22/175	1073,1808,1946,2044,3611,5063,5295,5336,5361,5532,5881,6387,7220,7223,8633,9353,10371,10512,80031,81029,91653,137970	CFL2,DPYSL2,EFNA5,EPHA5,ILK,PAK3,PIK3R1,PLCG2,PLXNA1,PPP3CB,RAC3,CXCL12,TRPC1,TRPC4,UNC5C,SLIT2,SEMA3A,SEMA3C,SEMA6D,WNT5B,BOC,UNC5D
16_Summary	KEGG Pathway	hsa04650	Natural killer cell mediated cytotoxicity	-4.37594	-3.39575	17/133	356,919,962,3106,3107,3384,3683,3821,4068,5295,5336,5532,5579,5881,7535,8743,10870	FASLG,CD247,CD48,HLA-B,HLA-C,ICAM2,ITGAL,KLRC1,SH2D1A,PIK3R1,PLCG2,PPP3CB,PRKCB,RAC3,ZAP70,TNFSF10,HCST
16_Member	KEGG Pathway	hsa04650	Natural killer cell mediated cytotoxicity	-4.37594	-3.39575	17/133	356,919,962,3106,3107,3384,3683,3821,4068,5295,5336,5532,5579,5881,7535,8743,10870	FASLG,CD247,CD48,HLA-B,HLA-C,ICAM2,ITGAL,KLRC1,SH2D1A,PIK3R1,PLCG2,PPP3CB,PRKCB,RAC3,ZAP70,TNFSF10,HCST
16_Member	KEGG Pathway	ko04650	Natural killer cell mediated cytotoxicity	-4.37594	-3.39575	17/133	356,919,962,3106,3107,3384,3683,3821,4068,5295,5336,5532,5579,5881,7535,8743,10870	FASLG,CD247,CD48,HLA-B,HLA-C,ICAM2,ITGAL,KLRC1,SH2D1A,PIK3R1,PLCG2,PPP3CB,PRKCB,RAC3,ZAP70,TNFSF10,HCST
17_Summary	KEGG Pathway	hsa05144	Malaria	-4.25967	-3.27421	11/55	3082,3606,3683,3820,6403,6414,7043,7060,7097,7412,54106	HGF,IL18,ITGAL,KLRB1,SELP,SELENOP,TGFB3,THBS4,TLR2,VCAM1,TLR9
17_Member	KEGG Pathway	hsa05144	Malaria	-4.25967	-3.27421	11/55	3082,3606,3683,3820,6403,6414,7043,7060,7097,7412,54106	HGF,IL18,ITGAL,KLRB1,SELP,SELENOP,TGFB3,THBS4,TLR2,VCAM1,TLR9
17_Member	KEGG Pathway	ko05144	Malaria	-4.00142	-3.03482	10/49	3082,3606,3683,3820,6403,7043,7060,7097,7412,54106	HGF,IL18,ITGAL,KLRB1,SELP,TGFB3,THBS4,TLR2,VCAM1,TLR9
18_Summary	KEGG Pathway	hsa04621	NOD-like receptor signaling pathway	-4.00657	-3.06633	19/170	834,1536,2633,2634,2635,3428,3606,3708,6352,7205,11035,51393,84168,84674,114548,115362,118429,340061,440068	CASP1,CYBB,GBP1,GBP2,GBP3,IFI16,IL18,ITPR1,CCL5,TRIP6,RIPK3,TRPV2,ANTXR1,CARD6,NLRP3,GBP5,ANTXR2,STING1,CARD17
18_Member	KEGG Pathway	hsa04621	NOD-like receptor signaling pathway	-4.00657	-3.06633	19/170	834,1536,2633,2634,2635,3428,3606,3708,6352,7205,11035,51393,84168,84674,114548,115362,118429,340061,440068	CASP1,CYBB,GBP1,GBP2,GBP3,IFI16,IL18,ITPR1,CCL5,TRIP6,RIPK3,TRPV2,ANTXR1,CARD6,NLRP3,GBP5,ANTXR2,STING1,CARD17
18_Member	KEGG Pathway	ko04621	NOD-like receptor signaling pathway	-4.00657	-3.06633	19/170	834,1536,2633,2634,2635,3428,3606,3708,6352,7205,11035,51393,84168,84674,114548,115362,118429,340061,440068	CASP1,CYBB,GBP1,GBP2,GBP3,IFI16,IL18,ITPR1,CCL5,TRIP6,RIPK3,TRPV2,ANTXR1,CARD6,NLRP3,GBP5,ANTXR2,STING1,CARD17
19_Summary	KEGG Pathway	hsa04610	Complement and coagulation cascades	-3.99458	-3.03482	13/79	2,715,716,730,733,1191,1675,2161,2162,3075,3426,3684,5627	A2M,C1R,C1S,C7,C8G,CLU,CFD,F12,F13A1,CFH,CFI,ITGAM,PROS1
19_Member	KEGG Pathway	hsa04610	Complement and coagulation cascades	-3.99458	-3.03482	13/79	2,715,716,730,733,1191,1675,2161,2162,3075,3426,3684,5627	A2M,C1R,C1S,C7,C8G,CLU,CFD,F12,F13A1,CFH,CFI,ITGAM,PROS1
19_Member	KEGG Pathway	ko04610	Complement and coagulation cascades	-3.99458	-3.03482	13/79	2,715,716,730,733,1191,1675,2161,2162,3075,3426,3684,5627	A2M,C1R,C1S,C7,C8G,CLU,CFD,F12,F13A1,CFH,CFI,ITGAM,PROS1
20_Summary	KEGG Pathway	hsa04390	Hippo signaling pathway	-3.9592	-3.00441	21/174	60,268,652,653,894,1490,2736,3398,4355,5516,5521,6591,7043,7473,8324,8994,23513,79633,81029,122786,728378	ACTB,AMH,BMP4,BMP5,CCND2,CCN2,GLI2,ID2,MPP2,PPP2CB,PPP2R2B,SNAI2,TGFB3,WNT3,FZD7,LIMD1,SCRIB,FAT4,WNT5B,FRMD6,POTEF
20_Member	KEGG Pathway	hsa04390	Hippo signaling pathway	-3.9592	-3.00441	21/174	60,268,652,653,894,1490,2736,3398,4355,5516,5521,6591,7043,7473,8324,8994,23513,79633,81029,122786,728378	ACTB,AMH,BMP4,BMP5,CCND2,CCN2,GLI2,ID2,MPP2,PPP2CB,PPP2R2B,SNAI2,TGFB3,WNT3,FZD7,LIMD1,SCRIB,FAT4,WNT5B,FRMD6,POTEF
20_Member	KEGG Pathway	ko04390	Hippo signaling pathway	-3.31096	-2.42028	18/154	60,268,652,653,894,1490,2736,3398,5516,5521,6591,7043,7473,8324,8994,23513,81029,122786	ACTB,AMH,BMP4,BMP5,CCND2,CCN2,GLI2,ID2,PPP2CB,PPP2R2B,SNAI2,TGFB3,WNT3,FZD7,LIMD1,SCRIB,WNT5B,FRMD6

## Sheet: GSE70768.GO
GroupID	Category	Term	Description	LogP	Log(q-value)	InTerm_InList	Genes	Symbols
1_Summary	GO Biological Processes	GO:0044283	small molecule biosynthetic process	-10.1719	-5.85501	21/554	18,33,47,220,247,1717,1718,2629,2746,2806,3155,4598,5091,6697,23541,27232,54898,84696,85414,255189,403313,6610,8821,22845,129642,30,3712,25953,27163,55526,51109	ABAT,ACADL,ACLY,ALDH1A3,ALOX15B,DHCR7,DHCR24,GBA,GLUD1,GOT2,HMGCL,MVK,PC,SPR,SEC14L2,GNMT,ELOVL2,ABHD1,SLC45A3,PLA2G4F,PLPP6,SMPD2,INPP4B,DOLK,MBOAT2,ACAA1,IVD,PNKD,NAAA,DHTKD1,RDH11
1_Member	GO Biological Processes	GO:0044283	small molecule biosynthetic process	-10.1719	-5.85501	21/554	18,33,47,220,247,1717,1718,2629,2746,2806,3155,4598,5091,6697,23541,27232,54898,84696,85414,255189,403313	ABAT,ACADL,ACLY,ALDH1A3,ALOX15B,DHCR7,DHCR24,GBA,GLUD1,GOT2,HMGCL,MVK,PC,SPR,SEC14L2,GNMT,ELOVL2,ABHD1,SLC45A3,PLA2G4F,PLPP6
1_Member	GO Biological Processes	GO:0008610	lipid biosynthetic process	-6.29547	-3.02274	18/693	33,47,220,247,1717,1718,2629,4598,6610,8821,22845,23541,54898,84696,85414,129642,255189,403313	ACADL,ACLY,ALDH1A3,ALOX15B,DHCR7,DHCR24,GBA,MVK,SMPD2,INPP4B,DOLK,SEC14L2,ELOVL2,ABHD1,SLC45A3,MBOAT2,PLA2G4F,PLPP6
1_Member	GO Biological Processes	GO:0046394	carboxylic acid biosynthetic process	-5.21955	-2.34471	11/315	18,33,47,220,247,2746,2806,54898,84696,85414,255189	ABAT,ACADL,ACLY,ALDH1A3,ALOX15B,GLUD1,GOT2,ELOVL2,ABHD1,SLC45A3,PLA2G4F
1_Member	GO Biological Processes	GO:0016053	organic acid biosynthetic process	-5.19357	-2.34471	11/317	18,33,47,220,247,2746,2806,54898,84696,85414,255189	ABAT,ACADL,ACLY,ALDH1A3,ALOX15B,GLUD1,GOT2,ELOVL2,ABHD1,SLC45A3,PLA2G4F
1_Member	GO Biological Processes	GO:0032787	monocarboxylic acid metabolic process	-5.17131	-2.33791	15/595	18,30,33,47,220,247,3712,5091,25953,27163,54898,55526,84696,85414,255189	ABAT,ACAA1,ACADL,ACLY,ALDH1A3,ALOX15B,IVD,PC,PNKD,NAAA,ELOVL2,DHTKD1,ABHD1,SLC45A3,PLA2G4F
1_Member	GO Biological Processes	GO:0072330	monocarboxylic acid biosynthetic process	-4.14474	-1.495	8/214	33,47,220,247,54898,84696,85414,255189	ACADL,ACLY,ALDH1A3,ALOX15B,ELOVL2,ABHD1,SLC45A3,PLA2G4F
1_Member	GO Biological Processes	GO:0006633	fatty acid biosynthetic process	-4.06403	-1.46031	7/163	33,47,247,54898,84696,85414,255189	ACADL,ACLY,ALOX15B,ELOVL2,ABHD1,SLC45A3,PLA2G4F
1_Member	GO Biological Processes	GO:0006631	fatty acid metabolic process	-3.67784	-1.152	10/390	30,33,47,247,3712,27163,54898,84696,85414,255189	ACAA1,ACADL,ACLY,ALOX15B,IVD,NAAA,ELOVL2,ABHD1,SLC45A3,PLA2G4F
1_Member	GO Biological Processes	GO:0120254	olefinic compound metabolic process	-2.96807	-0.665374	5/121	30,220,247,51109,54898	ACAA1,ALDH1A3,ALOX15B,RDH11,ELOVL2
1_Member	GO Biological Processes	GO:1901570	fatty acid derivative biosynthetic process	-2.40062	-0.33201	3/50	247,3155,54898	ALOX15B,HMGCL,ELOVL2
1_Member	GO Biological Processes	GO:0006636	unsaturated fatty acid biosynthetic process	-2.3763	-0.318859	3/51	247,54898,255189	ALOX15B,ELOVL2,PLA2G4F
1_Member	GO Biological Processes	GO:0033559	unsaturated fatty acid metabolic process	-2.18667	-0.212284	4/116	30,247,54898,255189	ACAA1,ALOX15B,ELOVL2,PLA2G4F
2_Summary	GO Biological Processes	GO:0009063	cellular amino acid catabolic process	-9.90589	-5.85501	11/110	18,384,2746,2806,2954,3155,3712,23464,23576,27034,84706,30,33,84696,8821,25953,2937,6611,27232,2235,5091,55526,64968,122961,23541,64757,8566,51380,47	ABAT,ARG2,GLUD1,GOT2,GSTZ1,HMGCL,IVD,GCAT,DDAH1,ACAD8,GPT2,ACAA1,ACADL,ABHD1,INPP4B,PNKD,GSS,SMS,GNMT,FECH,PC,DHTKD1,MRPS6,ISCA2,SEC14L2,MTARC1,PDXK,CSAD,ACLY
2_Member	GO Biological Processes	GO:0009063	cellular amino acid catabolic process	-9.90589	-5.85501	11/110	18,384,2746,2806,2954,3155,3712,23464,23576,27034,84706	ABAT,ARG2,GLUD1,GOT2,GSTZ1,HMGCL,IVD,GCAT,DDAH1,ACAD8,GPT2
2_Member	GO Biological Processes	GO:0046395	carboxylic acid catabolic process	-9.3758	-5.53086	14/237	18,30,33,384,2746,2806,2954,3155,3712,23464,23576,27034,84696,84706	ABAT,ACAA1,ACADL,ARG2,GLUD1,GOT2,GSTZ1,HMGCL,IVD,GCAT,DDAH1,ACAD8,ABHD1,GPT2
2_Member	GO Biological Processes	GO:0016054	organic acid catabolic process	-9.28071	-5.53086	14/241	18,30,33,384,2746,2806,2954,3155,3712,23464,23576,27034,84696,84706	ABAT,ACAA1,ACADL,ARG2,GLUD1,GOT2,GSTZ1,HMGCL,IVD,GCAT,DDAH1,ACAD8,ABHD1,GPT2
2_Member	GO Biological Processes	GO:0044282	small molecule catabolic process	-8.52844	-4.87549	16/378	18,30,33,384,2746,2806,2954,3155,3712,8821,23464,23576,25953,27034,84696,84706	ABAT,ACAA1,ACADL,ARG2,GLUD1,GOT2,GSTZ1,HMGCL,IVD,INPP4B,GCAT,DDAH1,PNKD,ACAD8,ABHD1,GPT2
2_Member	GO Biological Processes	GO:0006520	cellular amino acid metabolic process	-8.37896	-4.8052	14/283	18,384,2746,2806,2937,2954,3155,3712,6611,23464,23576,27034,27232,84706	ABAT,ARG2,GLUD1,GOT2,GSS,GSTZ1,HMGCL,IVD,SMS,GCAT,DDAH1,ACAD8,GNMT,GPT2
2_Member	GO Cellular Components	GO:0005759	mitochondrial matrix	-6.3145	-3.02274	15/480	18,33,384,2235,2746,2806,2954,3155,3712,5091,27034,55526,64968,84706,122961	ABAT,ACADL,ARG2,FECH,GLUD1,GOT2,GSTZ1,HMGCL,IVD,PC,ACAD8,DHTKD1,MRPS6,GPT2,ISCA2
2_Member	GO Molecular Functions	GO:0019842	vitamin binding	-6.29806	-3.02274	9/149	18,2806,5091,23464,23541,27232,55526,64757,84706	ABAT,GOT2,PC,GCAT,SEC14L2,GNMT,DHTKD1,MTARC1,GPT2
2_Member	GO Biological Processes	GO:1901606	alpha-amino acid catabolic process	-5.84787	-2.67204	7/87	384,2746,2806,2954,23464,23576,84706	ARG2,GLUD1,GOT2,GSTZ1,GCAT,DDAH1,GPT2
2_Member	GO Molecular Functions	GO:0030170	pyridoxal phosphate binding	-5.39627	-1.9986	7/55	18,2806,8566,23464,51380,64757,84706	ABAT,GOT2,PDXK,GCAT,CSAD,MTARC1,GPT2
2_Member	GO Molecular Functions	GO:0070279	vitamin B6 binding	-5.34271	-1.9908	7/56	18,2806,8566,23464,51380,64757,84706	ABAT,GOT2,PDXK,GCAT,CSAD,MTARC1,GPT2
2_Member	GO Biological Processes	GO:1901605	alpha-amino acid metabolic process	-5.31114	-2.37745	9/196	384,2746,2806,2954,6611,23464,23576,27232,84706	ARG2,GLUD1,GOT2,GSTZ1,SMS,GCAT,DDAH1,GNMT,GPT2
2_Member	GO Biological Processes	GO:0009065	glutamine family amino acid catabolic process	-4.5423	-1.79034	4/28	384,2746,2806,23576	ARG2,GLUD1,GOT2,DDAH1
2_Member	GO Molecular Functions	GO:0008483	transaminase activity	-3.5104	-1.04498	3/21	18,2806,84706	ABAT,GOT2,GPT2
2_Member	GO Molecular Functions	GO:0016769	transferase activity, transferring nitrogenous groups	-3.44876	-0.999936	3/22	18,2806,84706	ABAT,GOT2,GPT2
2_Member	GO Biological Processes	GO:0009064	glutamine family amino acid metabolic process	-2.78611	-0.557702	4/79	384,2746,2806,23576	ARG2,GLUD1,GOT2,DDAH1
2_Member	GO Biological Processes	GO:0043648	dicarboxylic acid metabolic process	-2.46159	-0.36736	4/97	47,2746,2806,84706	ACLY,GLUD1,GOT2,GPT2
3_Summary	GO Biological Processes	GO:0006397	mRNA processing	-7.64097	-4.13415	16/500	1025,6294,6430,6433,6625,8106,8241,9129,9667,9924,10147,10180,10181,10212,22985,23524,3299,6046,9739,10482,30827,81576	CDK9,SAFB,SRSF5,SFSWAP,SNRNP70,PABPN1,RBM10,PRPF3,SAFB2,PAN2,SUGP2,RBM6,RBM5,DDX39A,ACIN1,SRRM2,HSF4,BRD2,SETD1A,NXF1,CXXC1,YJU2B
3_Member	GO Biological Processes	GO:0006397	mRNA processing	-7.64097	-4.13415	16/500	1025,6294,6430,6433,6625,8106,8241,9129,9667,9924,10147,10180,10181,10212,22985,23524	CDK9,SAFB,SRSF5,SFSWAP,SNRNP70,PABPN1,RBM10,PRPF3,SAFB2,PAN2,SUGP2,RBM6,RBM5,DDX39A,ACIN1,SRRM2
3_Member	GO Cellular Components	GO:0016607	nuclear speck	-6.22894	-2.99097	13/412	3299,6046,6430,6625,8106,8241,9129,9739,10212,10482,22985,23524,30827	HSF4,BRD2,SRSF5,SNRNP70,PABPN1,RBM10,PRPF3,SETD1A,DDX39A,NXF1,ACIN1,SRRM2,CXXC1
3_Member	GO Biological Processes	GO:0016071	mRNA metabolic process	-5.65476	-2.61158	16/704	1025,6294,6430,6433,6625,8106,8241,9129,9667,9924,10147,10180,10181,10212,22985,23524	CDK9,SAFB,SRSF5,SFSWAP,SNRNP70,PABPN1,RBM10,PRPF3,SAFB2,PAN2,SUGP2,RBM6,RBM5,DDX39A,ACIN1,SRRM2
3_Member	GO Biological Processes	GO:0008380	RNA splicing	-5.21201	-2.34471	12/433	6430,6433,6625,8241,9129,10147,10180,10181,10212,22985,23524,81576	SRSF5,SFSWAP,SNRNP70,RBM10,PRPF3,SUGP2,RBM6,RBM5,DDX39A,ACIN1,SRRM2,YJU2B
3_Member	GO Biological Processes	GO:0050684	regulation of mRNA processing	-4.91079	-2.09036	7/137	1025,6294,6433,6625,8241,9667,10181	CDK9,SAFB,SFSWAP,SNRNP70,RBM10,SAFB2,RBM5
3_Member	GO Biological Processes	GO:0000377	RNA splicing, via transesterification reactions with bulged adenosine as nucleophile	-4.09611	-1.47659	9/319	6430,6433,6625,8241,9129,10180,10181,10212,23524	SRSF5,SFSWAP,SNRNP70,RBM10,PRPF3,RBM6,RBM5,DDX39A,SRRM2
3_Member	GO Biological Processes	GO:0000398	mRNA splicing, via spliceosome	-4.09611	-1.47659	9/319	6430,6433,6625,8241,9129,10180,10181,10212,23524	SRSF5,SFSWAP,SNRNP70,RBM10,PRPF3,RBM6,RBM5,DDX39A,SRRM2
3_Member	GO Biological Processes	GO:0000375	RNA splicing, via transesterification reactions	-4.05497	-1.45893	9/323	6430,6433,6625,8241,9129,10180,10181,10212,23524	SRSF5,SFSWAP,SNRNP70,RBM10,PRPF3,RBM6,RBM5,DDX39A,SRRM2
3_Member	GO Biological Processes	GO:1903311	regulation of mRNA metabolic process	-3.65197	-1.13891	8/288	1025,6294,6433,6625,8241,9667,9924,10181	CDK9,SAFB,SFSWAP,SNRNP70,RBM10,SAFB2,PAN2,RBM5
3_Member	GO Biological Processes	GO:0050686	negative regulation of mRNA processing	-3.253	-0.840603	3/29	1025,6433,8241	CDK9,SFSWAP,RBM10
3_Member	GO Biological Processes	GO:0043484	regulation of RNA splicing	-2.83189	-0.584172	5/148	6430,6433,6625,8241,10181	SRSF5,SFSWAP,SNRNP70,RBM10,RBM5
3_Member	GO Cellular Components	GO:0005684	U2-type spliceosomal complex	-2.75067	-0.546486	4/92	6625,9129,23524,81576	SNRNP70,PRPF3,SRRM2,YJU2B
3_Member	GO Biological Processes	GO:0048024	regulation of mRNA splicing, via spliceosome	-2.60272	-0.454929	4/101	6433,6625,8241,10181	SFSWAP,SNRNP70,RBM10,RBM5
3_Member	GO Cellular Components	GO:0005681	spliceosomal complex	-2.35398	-0.305269	5/191	6625,9129,10181,23524,81576	SNRNP70,PRPF3,RBM5,SRRM2,YJU2B
3_Member	GO Biological Processes	GO:0000380	alternative mRNA splicing, via spliceosome	-2.03616	-0.123318	3/77	6433,8241,10181	SFSWAP,RBM10,RBM5
3_Member	GO Biological Processes	GO:0000245	spliceosomal complex assembly	-2.00581	-0.10722	3/79	6430,6433,10181	SRSF5,SFSWAP,RBM5
4_Summary	GO Biological Processes	GO:1901615	organic hydroxy compound metabolic process	-7.21874	-3.76992	17/533	18,30,33,47,220,247,1717,1718,2629,4598,6697,8821,23541,25953,27163,51109,403313,22937	ABAT,ACAA1,ACADL,ACLY,ALDH1A3,ALOX15B,DHCR7,DHCR24,GBA,MVK,SPR,INPP4B,SEC14L2,PNKD,NAAA,RDH11,PLPP6,SCAP
4_Member	GO Biological Processes	GO:1901615	organic hydroxy compound metabolic process	-7.21874	-3.76992	17/533	18,30,33,47,220,247,1717,1718,2629,4598,6697,8821,23541,25953,27163,51109,403313	ABAT,ACAA1,ACADL,ACLY,ALDH1A3,ALOX15B,DHCR7,DHCR24,GBA,MVK,SPR,INPP4B,SEC14L2,PNKD,NAAA,RDH11,PLPP6
4_Member	GO Biological Processes	GO:0006066	alcohol metabolic process	-6.38817	-3.02274	13/349	33,47,220,1717,1718,2629,4598,6697,8821,23541,27163,51109,403313	ACADL,ACLY,ALDH1A3,DHCR7,DHCR24,GBA,MVK,SPR,INPP4B,SEC14L2,NAAA,RDH11,PLPP6
4_Member	GO Biological Processes	GO:0006695	cholesterol biosynthetic process	-5.72904	-2.61718	6/58	47,1717,1718,4598,23541,403313	ACLY,DHCR7,DHCR24,MVK,SEC14L2,PLPP6
4_Member	GO Biological Processes	GO:1902653	secondary alcohol biosynthetic process	-5.72904	-2.61718	6/58	47,1717,1718,4598,23541,403313	ACLY,DHCR7,DHCR24,MVK,SEC14L2,PLPP6
4_Member	GO Biological Processes	GO:0008203	cholesterol metabolic process	-5.52384	-2.51435	8/138	33,47,1717,1718,2629,4598,23541,403313	ACADL,ACLY,DHCR7,DHCR24,GBA,MVK,SEC14L2,PLPP6
4_Member	GO Biological Processes	GO:0046165	alcohol biosynthetic process	-5.47722	-2.48704	8/140	47,1717,1718,2629,4598,6697,23541,403313	ACLY,DHCR7,DHCR24,GBA,MVK,SPR,SEC14L2,PLPP6
4_Member	GO Biological Processes	GO:0016126	sterol biosynthetic process	-5.43524	-2.46354	6/65	47,1717,1718,4598,23541,403313	ACLY,DHCR7,DHCR24,MVK,SEC14L2,PLPP6
4_Member	GO Biological Processes	GO:1902652	secondary alcohol metabolic process	-5.298	-2.37745	8/148	33,47,1717,1718,2629,4598,23541,403313	ACADL,ACLY,DHCR7,DHCR24,GBA,MVK,SEC14L2,PLPP6
4_Member	GO Biological Processes	GO:0016125	sterol metabolic process	-5.19147	-2.34471	8/153	33,47,1717,1718,2629,4598,23541,403313	ACADL,ACLY,DHCR7,DHCR24,GBA,MVK,SEC14L2,PLPP6
4_Member	GO Biological Processes	GO:1901617	organic hydroxy compound biosynthetic process	-4.65099	-1.85538	9/237	47,247,1717,1718,2629,4598,6697,23541,403313	ACLY,ALOX15B,DHCR7,DHCR24,GBA,MVK,SPR,SEC14L2,PLPP6
4_Member	GO Biological Processes	GO:0008202	steroid metabolic process	-3.66476	-1.14536	9/319	30,33,47,1717,1718,2629,4598,23541,403313	ACAA1,ACADL,ACLY,DHCR7,DHCR24,GBA,MVK,SEC14L2,PLPP6
4_Member	GO Biological Processes	GO:0090181	regulation of cholesterol metabolic process	-3.06166	-0.399943	4/36	33,1717,22937,23541	ACADL,DHCR7,SCAP,SEC14L2
4_Member	GO Biological Processes	GO:0006694	steroid biosynthetic process	-3.05161	-0.715364	6/174	47,1717,1718,4598,23541,403313	ACLY,DHCR7,DHCR24,MVK,SEC14L2,PLPP6
5_Summary	GO Molecular Functions	GO:0016491	oxidoreductase activity	-5.85531	-2.67204	18/744	30,33,220,247,1534,1717,1718,2746,2954,3163,3712,6697,11068,27034,51109,51181,55526,64757	ACAA1,ACADL,ALDH1A3,ALOX15B,CYB561,DHCR7,DHCR24,GLUD1,GSTZ1,HMOX2,IVD,SPR,CYB561D2,ACAD8,RDH11,DCXR,DHTKD1,MTARC1
5_Member	GO Molecular Functions	GO:0016491	oxidoreductase activity	-5.85531	-2.67204	18/744	30,33,220,247,1534,1717,1718,2746,2954,3163,3712,6697,11068,27034,51109,51181,55526,64757	ACAA1,ACADL,ALDH1A3,ALOX15B,CYB561,DHCR7,DHCR24,GLUD1,GSTZ1,HMOX2,IVD,SPR,CYB561D2,ACAD8,RDH11,DCXR,DHTKD1,MTARC1
6_Summary	GO Biological Processes	GO:0010273	detoxification of copper ion	-5.69034	-2.61718	4/15	4493,4494,4495,4499,2954,51109,64757,2937,247,2786,4851,9792,1534,3163,2235,18,664,10519,23566	MT1E,MT1F,MT1G,MT1M,GSTZ1,RDH11,MTARC1,GSS,ALOX15B,GNG4,NOTCH1,SERTAD2,CYB561,HMOX2,FECH,ABAT,BNIP3,CIB1,LPAR3
6_Member	GO Biological Processes	GO:0010273	detoxification of copper ion	-5.69034	-2.61718	4/15	4493,4494,4495,4499	MT1E,MT1F,MT1G,MT1M
6_Member	GO Biological Processes	GO:1990169	stress response to copper ion	-5.69034	-2.61718	4/15	4493,4494,4495,4499	MT1E,MT1F,MT1G,MT1M
6_Member	GO Biological Processes	GO:0061687	detoxification of inorganic compound	-5.34623	-2.39226	4/18	4493,4494,4495,4499	MT1E,MT1F,MT1G,MT1M
6_Member	GO Biological Processes	GO:0097501	stress response to metal ion	-5.24573	-2.34471	4/19	4493,4494,4495,4499	MT1E,MT1F,MT1G,MT1M
6_Member	GO Biological Processes	GO:0071294	cellular response to zinc ion	-4.81853	-2.01069	4/24	4493,4494,4495,4499	MT1E,MT1F,MT1G,MT1M
6_Member	GO Biological Processes	GO:0071280	cellular response to copper ion	-4.5423	-1.79034	4/28	4493,4494,4495,4499	MT1E,MT1F,MT1G,MT1M
6_Member	GO Biological Processes	GO:0098754	detoxification	-4.25523	-1.55653	7/152	2954,4493,4494,4495,4499,51109,64757	GSTZ1,MT1E,MT1F,MT1G,MT1M,RDH11,MTARC1
6_Member	GO Biological Processes	GO:0046686	response to cadmium ion	-4.13091	-1.495	5/68	2937,4493,4494,4495,4499	GSS,MT1E,MT1F,MT1G,MT1M
6_Member	GO Biological Processes	GO:0006882	cellular zinc ion homeostasis	-4.00692	-1.42042	4/38	4493,4494,4495,4499	MT1E,MT1F,MT1G,MT1M
6_Member	GO Biological Processes	GO:0055069	zinc ion homeostasis	-3.91847	-1.37273	4/40	4493,4494,4495,4499	MT1E,MT1F,MT1G,MT1M
6_Member	GO Biological Processes	GO:0071276	cellular response to cadmium ion	-3.91847	-1.37273	4/40	4493,4494,4495,4499	MT1E,MT1F,MT1G,MT1M
6_Member	GO Biological Processes	GO:0046688	response to copper ion	-3.83472	-1.29572	4/42	4493,4494,4495,4499	MT1E,MT1F,MT1G,MT1M
6_Member	GO Biological Processes	GO:0045926	negative regulation of growth	-3.69177	-1.1594	8/249	247,2786,4493,4494,4495,4499,4851,9792	ALOX15B,GNG4,MT1E,MT1F,MT1G,MT1M,NOTCH1,SERTAD2
6_Member	GO Biological Processes	GO:0055076	transition metal ion homeostasis	-3.56727	-1.08459	6/139	1534,3163,4493,4494,4495,4499	CYB561,HMOX2,MT1E,MT1F,MT1G,MT1M
6_Member	GO Biological Processes	GO:0009636	response to toxic substance	-3.5427	-1.07161	8/262	2235,2954,4493,4494,4495,4499,51109,64757	FECH,GSTZ1,MT1E,MT1F,MT1G,MT1M,RDH11,MTARC1
6_Member	GO Biological Processes	GO:0010043	response to zinc ion	-3.29037	-0.872955	4/58	4493,4494,4495,4499	MT1E,MT1F,MT1G,MT1M
6_Member	GO Biological Processes	GO:0046916	cellular transition metal ion homeostasis	-3.05024	-0.715364	5/116	1534,4493,4494,4495,4499	CYB561,MT1E,MT1F,MT1G,MT1M
6_Member	GO Biological Processes	GO:0010038	response to metal ion	-2.55852	-0.426712	8/373	18,664,2235,2937,4493,4494,4495,4499	ABAT,BNIP3,FECH,GSS,MT1E,MT1F,MT1G,MT1M
6_Member	GO Biological Processes	GO:0071248	cellular response to metal ion	-2.0625	-0.1371	5/197	664,4493,4494,4495,4499	BNIP3,MT1E,MT1F,MT1G,MT1M
6_Member	GO Biological Processes	GO:0040008	regulation of growth	-2.00099	-0.106964	10/661	247,2786,4493,4494,4495,4499,4851,9792,10519,23566	ALOX15B,GNG4,MT1E,MT1F,MT1G,MT1M,NOTCH1,SERTAD2,CIB1,LPAR3
7_Summary	GO Molecular Functions	GO:0016627	oxidoreductase activity, acting on the CH-CH group of donors	-5.64127	-2.61158	6/60	30,33,1717,1718,3712,27034,84129,2629,5051,6610,26580,27163,84696,255189,247,8821,129642,403313,728294,54898	ACAA1,ACADL,DHCR7,DHCR24,IVD,ACAD8,ACAD11,GBA,PAFAH2,SMPD2,BSCL2,NAAA,ABHD1,PLA2G4F,ALOX15B,INPP4B,MBOAT2,PLPP6,D2HGDH,ELOVL2
7_Member	GO Molecular Functions	GO:0016627	oxidoreductase activity, acting on the CH-CH group of donors	-5.64127	-2.61158	6/60	30,33,1717,1718,3712,27034	ACAA1,ACADL,DHCR7,DHCR24,IVD,ACAD8
7_Member	GO Molecular Functions	GO:0003995	acyl-CoA dehydrogenase activity	-5.03915	-1.86363	4/12	33,3712,27034,84129	ACADL,IVD,ACAD8,ACAD11
7_Member	GO Biological Processes	GO:0016042	lipid catabolic process	-4.37161	-1.65316	10/321	30,33,2629,3712,5051,6610,26580,27163,84696,255189	ACAA1,ACADL,GBA,IVD,PAFAH2,SMPD2,BSCL2,NAAA,ABHD1,PLA2G4F
7_Member	GO Biological Processes	GO:0030258	lipid modification	-4.17325	-1.51153	8/212	30,33,247,2629,3712,8821,129642,403313	ACAA1,ACADL,ALOX15B,GBA,IVD,INPP4B,MBOAT2,PLPP6
7_Member	GO Biological Processes	GO:0044242	cellular lipid catabolic process	-3.32809	-0.900458	7/215	30,33,2629,3712,6610,84696,255189	ACAA1,ACADL,GBA,IVD,SMPD2,ABHD1,PLA2G4F
7_Member	GO Molecular Functions	GO:0050660	flavin adenine dinucleotide binding	-3.2895	-0.582925	6/84	33,1718,3712,27034,84129,728294	ACADL,DHCR24,IVD,ACAD8,ACAD11,D2HGDH
7_Member	GO Biological Processes	GO:0009062	fatty acid catabolic process	-2.41423	-0.341294	4/100	30,33,3712,84696	ACAA1,ACADL,IVD,ABHD1
7_Member	GO Biological Processes	GO:0034440	lipid oxidation	-2.29555	-0.274053	4/108	30,33,247,3712	ACAA1,ACADL,ALOX15B,IVD
7_Member	GO Biological Processes	GO:0001676	long-chain fatty acid metabolic process	-2.23998	-0.246963	4/112	30,33,247,54898	ACAA1,ACADL,ALOX15B,ELOVL2
7_Member	GO Biological Processes	GO:0072329	monocarboxylic acid catabolic process	-2.11064	-0.160129	4/122	30,33,3712,84696	ACAA1,ACADL,IVD,ABHD1
8_Summary	GO Molecular Functions	GO:0022889	serine transmembrane transporter activity	-4.39643	-1.66777	3/11	6509,6510,118980,18,1811,5349,6549,50636,84975,255189,2806,5873,84958,357,1135,85414,282679,389816	SLC1A4,SLC1A5,SFXN2,ABAT,SLC26A3,FXYD3,SLC9A2,ANO7,MFSD5,PLA2G4F,GOT2,RAB27A,SYTL1,SHROOM2,CHRNA2,SLC45A3,AQP11,LRRC26
8_Member	GO Molecular Functions	GO:0022889	serine transmembrane transporter activity	-4.39643	-1.66777	3/11	6509,6510,118980	SLC1A4,SLC1A5,SFXN2
8_Member	GO Biological Processes	GO:0032329	serine transport	-4.39643	-1.66777	3/11	6509,6510,118980	SLC1A4,SLC1A5,SFXN2
8_Member	GO Biological Processes	GO:0015740	C4-dicarboxylate transport	-3.1331	-0.753644	3/28	18,6509,6510	ABAT,SLC1A4,SLC1A5
8_Member	GO Molecular Functions	GO:0005310	dicarboxylic acid transmembrane transporter activity	-3.04397	-0.71325	3/30	1811,6509,6510	SLC26A3,SLC1A4,SLC1A5
8_Member	GO Molecular Functions	GO:0008509	anion transmembrane transporter activity	-3.00885	-0.68632	8/316	1811,5349,6509,6510,6549,50636,84975,118980	SLC26A3,FXYD3,SLC1A4,SLC1A5,SLC9A2,ANO7,MFSD5,SFXN2
8_Member	GO Biological Processes	GO:0006820	anion transport	-2.78929	-0.557702	10/509	18,1811,5349,6509,6510,6549,50636,84975,118980,255189	ABAT,SLC26A3,FXYD3,SLC1A4,SLC1A5,SLC9A2,ANO7,MFSD5,SFXN2,PLA2G4F
8_Member	GO Molecular Functions	GO:0015175	neutral amino acid transmembrane transporter activity	-2.74254	-0.545967	3/38	6509,6510,118980	SLC1A4,SLC1A5,SFXN2
8_Member	GO Biological Processes	GO:0006835	dicarboxylic acid transport	-2.66935	-0.496412	4/85	18,1811,6509,6510	ABAT,SLC26A3,SLC1A4,SLC1A5
8_Member	GO Molecular Functions	GO:0015103	inorganic anion transmembrane transporter activity	-2.52139	-0.401578	5/153	1811,5349,6509,50636,84975	SLC26A3,FXYD3,SLC1A4,ANO7,MFSD5
8_Member	GO Biological Processes	GO:0015849	organic acid transport	-2.45831	-0.366464	7/305	18,1811,2806,6509,6510,118980,255189	ABAT,SLC26A3,GOT2,SLC1A4,SLC1A5,SFXN2,PLA2G4F
8_Member	GO Biological Processes	GO:0015804	neutral amino acid transport	-2.4509	-0.361444	3/48	6509,6510,118980	SLC1A4,SLC1A5,SFXN2
8_Member	GO Biological Processes	GO:0043090	amino acid import	-2.32921	-0.293273	3/53	6509,6510,118980	SLC1A4,SLC1A5,SFXN2
8_Member	GO Biological Processes	GO:0098656	anion transmembrane transport	-2.29169	-0.272215	6/247	1811,6509,6510,6549,50636,118980	SLC26A3,SLC1A4,SLC1A5,SLC9A2,ANO7,SFXN2
8_Member	GO Cellular Components	GO:0042470	melanosome	-2.28144	-0.269352	4/109	5873,6509,6510,84958	RAB27A,SLC1A4,SLC1A5,SYTL1
8_Member	GO Cellular Components	GO:0048770	pigment granule	-2.28144	-0.269352	4/109	5873,6509,6510,84958	RAB27A,SLC1A4,SLC1A5,SYTL1
8_Member	GO Biological Processes	GO:0015698	inorganic anion transport	-2.19368	-0.212833	5/183	1811,5349,6509,50636,84975	SLC26A3,FXYD3,SLC1A4,ANO7,MFSD5
8_Member	GO Molecular Functions	GO:0015318	inorganic molecular entity transmembrane transporter activity	-2.10319	-0.156113	11/739	357,1135,1811,5349,6509,6549,50636,84975,85414,282679,389816	SHROOM2,CHRNA2,SLC26A3,FXYD3,SLC1A4,SLC9A2,ANO7,MFSD5,SLC45A3,AQP11,LRRC26
8_Member	GO Biological Processes	GO:0046942	carboxylic acid transport	-2.07913	-0.147176	6/274	18,1811,6509,6510,118980,255189	ABAT,SLC26A3,SLC1A4,SLC1A5,SFXN2,PLA2G4F
9_Summary	GO Molecular Functions	GO:0005096	GTPase activator activity	-4.20378	-1.51463	11/464	5364,6305,8786,9905,9909,57572,115703,119016,414189,101060321,102724862	PLXNB1,SBF1,RGS11,SGSM2,DENND4B,DOCK6,ARHGAP33,AGAP4,AGAP6,TBC1D3G,TBC1D3I
9_Member	GO Molecular Functions	GO:0005096	GTPase activator activity	-4.20378	-1.51463	11/464	5364,6305,8786,9905,9909,57572,115703,119016,414189,101060321,102724862	PLXNB1,SBF1,RGS11,SGSM2,DENND4B,DOCK6,ARHGAP33,AGAP4,AGAP6,TBC1D3G,TBC1D3I
9_Member	GO Molecular Functions	GO:0030695	GTPase regulator activity	-3.99418	-1.42042	11/490	5364,6305,8786,9905,9909,57572,115703,119016,414189,101060321,102724862	PLXNB1,SBF1,RGS11,SGSM2,DENND4B,DOCK6,ARHGAP33,AGAP4,AGAP6,TBC1D3G,TBC1D3I
9_Member	GO Molecular Functions	GO:0060589	nucleoside-triphosphatase regulator activity	-3.99418	-1.42042	11/490	5364,6305,8786,9905,9909,57572,115703,119016,414189,101060321,102724862	PLXNB1,SBF1,RGS11,SGSM2,DENND4B,DOCK6,ARHGAP33,AGAP4,AGAP6,TBC1D3G,TBC1D3I
9_Member	GO Molecular Functions	GO:0008047	enzyme activator activity	-2.60398	-0.454929	11/722	5364,6305,8786,9905,9909,57572,115703,119016,414189,101060321,102724862	PLXNB1,SBF1,RGS11,SGSM2,DENND4B,DOCK6,ARHGAP33,AGAP4,AGAP6,TBC1D3G,TBC1D3I
10_Summary	GO Biological Processes	GO:0016570	histone modification	-4.17885	-1.51153	11/467	1025,2648,3299,4302,4485,8085,8888,9112,9739,10013,30827,51409	CDK9,KAT2A,HSF4,MLLT6,MST1,KMT2D,MCM3AP,MTA1,SETD1A,HDAC6,CXXC1,HEMK1
10_Member	GO Biological Processes	GO:0016570	histone modification	-4.17885	-1.51153	11/467	1025,2648,3299,4302,4485,8085,8888,9112,9739,10013,30827	CDK9,KAT2A,HSF4,MLLT6,MST1,KMT2D,MCM3AP,MTA1,SETD1A,HDAC6,CXXC1
10_Member	GO Biological Processes	GO:0016569	covalent chromatin modification	-4.06511	-1.46031	11/481	1025,2648,3299,4302,4485,8085,8888,9112,9739,10013,30827	CDK9,KAT2A,HSF4,MLLT6,MST1,KMT2D,MCM3AP,MTA1,SETD1A,HDAC6,CXXC1
10_Member	GO Molecular Functions	GO:0042800	histone methyltransferase activity (H3-K4 specific)	-3.96194	-1.40242	3/17	8085,9739,30827	KMT2D,SETD1A,CXXC1
10_Member	GO Molecular Functions	GO:0008276	protein methyltransferase activity	-2.78576	-0.557702	4/90	8085,9739,30827,51409	KMT2D,SETD1A,CXXC1,HEMK1
10_Member	GO Molecular Functions	GO:0018024	histone-lysine N-methyltransferase activity	-2.6921	-0.510906	3/45	8085,9739,30827	KMT2D,SETD1A,CXXC1
10_Member	GO Molecular Functions	GO:0008170	N-methyltransferase activity	-2.63427	-0.472694	4/99	8085,9739,30827,51409	KMT2D,SETD1A,CXXC1,HEMK1
10_Member	GO Biological Processes	GO:0006479	protein methylation	-2.44267	-0.358299	5/182	4302,8085,9739,30827,51409	MLLT6,KMT2D,SETD1A,CXXC1,HEMK1
10_Member	GO Biological Processes	GO:0008213	protein alkylation	-2.44267	-0.358299	5/182	4302,8085,9739,30827,51409	MLLT6,KMT2D,SETD1A,CXXC1,HEMK1
10_Member	GO Biological Processes	GO:0034968	histone lysine methylation	-2.38666	-0.322554	4/116	4302,8085,9739,30827	MLLT6,KMT2D,SETD1A,CXXC1
10_Member	GO Molecular Functions	GO:0042054	histone methyltransferase activity	-2.37767	-0.318859	3/58	8085,9739,30827	KMT2D,SETD1A,CXXC1
10_Member	GO Biological Processes	GO:0051568	histone H3-K4 methylation	-2.35677	-0.305885	3/59	8085,9739,30827	KMT2D,SETD1A,CXXC1
10_Member	GO Cellular Components	GO:0035097	histone methyltransferase complex	-2.33625	-0.29628	3/60	8085,9739,30827	KMT2D,SETD1A,CXXC1
10_Member	GO Molecular Functions	GO:0016279	protein-lysine N-methyltransferase activity	-2.31611	-0.284342	3/61	8085,9739,30827	KMT2D,SETD1A,CXXC1
10_Member	GO Molecular Functions	GO:0016278	lysine N-methyltransferase activity	-2.29633	-0.274053	3/62	8085,9739,30827	KMT2D,SETD1A,CXXC1
10_Member	GO Biological Processes	GO:0018205	peptidyl-lysine modification	-2.25239	-0.252485	7/380	2648,4302,8085,8888,9739,10013,30827	KAT2A,MLLT6,KMT2D,MCM3AP,SETD1A,HDAC6,CXXC1
10_Member	GO Biological Processes	GO:0018022	peptidyl-lysine methylation	-2.1891	-0.212284	4/132	4302,8085,9739,30827	MLLT6,KMT2D,SETD1A,CXXC1
10_Member	GO Biological Processes	GO:0016571	histone methylation	-2.07934	-0.147176	4/142	4302,8085,9739,30827	MLLT6,KMT2D,SETD1A,CXXC1
11_Summary	GO Biological Processes	GO:0006790	sulfur compound metabolic process	-4.17386	-1.51153	10/339	47,55,2937,2954,3155,4598,6611,27232,54898,122961	ACLY,ACP3,GSS,GSTZ1,HMGCL,MVK,SMS,GNMT,ELOVL2,ISCA2
11_Member	GO Biological Processes	GO:0006790	sulfur compound metabolic process	-4.17386	-1.51153	10/339	47,55,2937,2954,3155,4598,6611,27232,54898,122961	ACLY,ACP3,GSS,GSTZ1,HMGCL,MVK,SMS,GNMT,ELOVL2,ISCA2
11_Member	GO Biological Processes	GO:0006637	acyl-CoA metabolic process	-2.47776	-0.376264	4/96	47,3155,4598,54898	ACLY,HMGCL,MVK,ELOVL2
11_Member	GO Biological Processes	GO:0035383	thioester metabolic process	-2.47776	-0.376264	4/96	47,3155,4598,54898	ACLY,HMGCL,MVK,ELOVL2
11_Member	GO Biological Processes	GO:0033865	nucleoside bisphosphate metabolic process	-2.0389	-0.123318	4/128	47,3155,4598,54898	ACLY,HMGCL,MVK,ELOVL2
11_Member	GO Biological Processes	GO:0033875	ribonucleoside bisphosphate metabolic process	-2.0389	-0.123318	4/128	47,3155,4598,54898	ACLY,HMGCL,MVK,ELOVL2
11_Member	GO Biological Processes	GO:0034032	purine nucleoside bisphosphate metabolic process	-2.0389	-0.123318	4/128	47,3155,4598,54898	ACLY,HMGCL,MVK,ELOVL2
12_Summary	GO Molecular Functions	GO:0043014	alpha-tubulin binding	-4.13859	-1.495	4/40	10013,114327,374666,100287171,5116,22897,84461,8216,9727,8675,9905,23274,2622,85378,90990,10057,23207,100137049	HDAC6,EFHC1,WASH3P,WASHC1,PCNT,CEP164,NEURL4,LZTR1,RAB11FIP3,STX16,SGSM2,CLEC16A,GAS8,TUBGCP6,KIFC2,ABCC5,PLEKHM2,PLA2G4B
12_Member	GO Molecular Functions	GO:0043014	alpha-tubulin binding	-4.13859	-1.495	4/40	10013,114327,374666,100287171	HDAC6,EFHC1,WASH3P,WASHC1
12_Member	GO Cellular Components	GO:0005814	centriole	-2.8712	-0.604097	5/145	5116,22897,84461,374666,100287171	PCNT,CEP164,NEURL4,WASH3P,WASHC1
12_Member	GO Cellular Components	GO:0055038	recycling endosome membrane	-2.75067	-0.546486	4/92	8216,9727,374666,100287171	LZTR1,RAB11FIP3,WASH3P,WASHC1
12_Member	GO Biological Processes	GO:0042147	retrograde transport, endosome to Golgi	-2.6996	-0.510906	4/95	8675,9905,374666,100287171	STX16,SGSM2,WASH3P,WASHC1
12_Member	GO Biological Processes	GO:0016197	endosomal transport	-2.68673	-0.510906	6/234	8675,9727,9905,23274,374666,100287171	STX16,RAB11FIP3,SGSM2,CLEC16A,WASH3P,WASHC1
12_Member	GO Molecular Functions	GO:0015631	tubulin binding	-2.27687	-0.269352	7/376	2622,10013,85378,90990,114327,374666,100287171	GAS8,HDAC6,TUBGCP6,KIFC2,EFHC1,WASH3P,WASHC1
12_Member	GO Cellular Components	GO:0010008	endosome membrane	-2.0477	-0.125537	8/520	8216,9727,10057,23207,23274,374666,100137049,100287171	LZTR1,RAB11FIP3,ABCC5,PLEKHM2,CLEC16A,WASH3P,PLA2G4B,WASHC1
13_Summary	GO Molecular Functions	GO:0015144	carbohydrate transmembrane transporter activity	-3.96207	-1.40242	4/39	55974,85414,154091,282679	SLC50A1,SLC45A3,SLC2A12,AQP11
13_Member	GO Molecular Functions	GO:0015144	carbohydrate transmembrane transporter activity	-3.96207	-1.40242	4/39	55974,85414,154091,282679	SLC50A1,SLC45A3,SLC2A12,AQP11
13_Member	GO Molecular Functions	GO:0051119	sugar transmembrane transporter activity	-3.18029	-0.792171	3/27	55974,85414,154091	SLC50A1,SLC45A3,SLC2A12
14_Summary	GO Cellular Components	GO:0030131	clathrin adaptor complex	-3.83162	-0.998221	4/23	162,10053,10717,54812,2629,54432,56927,5873,23245	AP1B1,AP1M2,AP4B1,AFTPH,GBA,YIPF1,GPR108,RAB27A,ASTN2
14_Member	GO Cellular Components	GO:0030131	clathrin adaptor complex	-3.83162	-0.998221	4/23	162,10053,10717,54812	AP1B1,AP1M2,AP4B1,AFTPH
14_Member	GO Cellular Components	GO:0030119	AP-type membrane coat adaptor complex	-3.10874	-0.430214	4/35	162,10053,10717,54812	AP1B1,AP1M2,AP4B1,AFTPH
14_Member	GO Cellular Components	GO:0030118	clathrin coat	-2.73155	-0.218485	4/44	162,10053,10717,54812	AP1B1,AP1M2,AP4B1,AFTPH
14_Member	GO Cellular Components	GO:0005802	trans-Golgi network	-2.1858	-0.212284	6/260	162,2629,10053,54432,54812,56927	AP1B1,GBA,AP1M2,YIPF1,AFTPH,GPR108
14_Member	GO Cellular Components	GO:0030136	clathrin-coated vesicle	-2.0625	-0.1371	5/197	162,5873,10053,23245,54812	AP1B1,RAB27A,AP1M2,ASTN2,AFTPH
15_Summary	GO Biological Processes	GO:0045618	positive regulation of keratinocyte differentiation	-3.64386	-1.13705	3/19	247,4851,55506,4824,23242,55897,220,2806,3155,4485,6430,80279,91355,25803,91461,8553	ALOX15B,NOTCH1,MACROH2A2,NKX3-1,COBL,MESP1,ALDH1A3,GOT2,HMGCL,MST1,SRSF5,CDK5RAP3,LRP5L,SPDEF,PKDCC,BHLHE40
15_Member	GO Biological Processes	GO:0045618	positive regulation of keratinocyte differentiation	-3.64386	-1.13705	3/19	247,4851,55506	ALOX15B,NOTCH1,MACROH2A2
15_Member	GO Biological Processes	GO:0045606	positive regulation of epidermal cell differentiation	-3.18029	-0.792171	3/27	247,4851,55506	ALOX15B,NOTCH1,MACROH2A2
15_Member	GO Biological Processes	GO:0001756	somitogenesis	-3.12783	-0.753644	4/64	4824,4851,23242,55897	NKX3-1,NOTCH1,COBL,MESP1
15_Member	GO Biological Processes	GO:0030858	positive regulation of epithelial cell differentiation	-3.12783	-0.753644	4/64	247,4851,55506,55897	ALOX15B,NOTCH1,MACROH2A2,MESP1
15_Member	GO Biological Processes	GO:0045684	positive regulation of epidermis development	-2.96107	-0.662232	3/32	247,4851,55506	ALOX15B,NOTCH1,MACROH2A2
15_Member	GO Biological Processes	GO:0045616	regulation of keratinocyte differentiation	-2.77624	-0.554659	3/37	247,4851,55506	ALOX15B,NOTCH1,MACROH2A2
15_Member	GO Biological Processes	GO:0061053	somite development	-2.68815	-0.510906	4/84	4824,4851,23242,55897	NKX3-1,NOTCH1,COBL,MESP1
15_Member	GO Biological Processes	GO:0030850	prostate gland development	-2.53082	-0.40422	3/45	247,4824,4851	ALOX15B,NKX3-1,NOTCH1
15_Member	GO Biological Processes	GO:0035282	segmentation	-2.46159	-0.36736	4/97	4824,4851,23242,55897	NKX3-1,NOTCH1,COBL,MESP1
15_Member	GO Biological Processes	GO:0045604	regulation of epidermal cell differentiation	-2.21962	-0.23132	3/58	247,4851,55506	ALOX15B,NOTCH1,MACROH2A2
15_Member	GO Biological Processes	GO:0048732	gland development	-2.15484	0	12/440	220,247,2806,3155,4485,4824,4851,6430,23242,55897,80279,91355	ALDH1A3,ALOX15B,GOT2,HMGCL,MST1,NKX3-1,NOTCH1,SRSF5,COBL,MESP1,CDK5RAP3,LRP5L
15_Member	GO Biological Processes	GO:0045682	regulation of epidermis development	-2.08272	-0.147444	3/65	247,4851,55506	ALOX15B,NOTCH1,MACROH2A2
15_Member	GO Biological Processes	GO:0048565	digestive tract development	-2.05058	-0.126802	4/127	4851,23242,25803,91461	NOTCH1,COBL,SPDEF,PKDCC
15_Member	GO Biological Processes	GO:0009952	anterior/posterior pattern specification	-2.01844	-0.118312	5/202	4824,4851,8553,23242,55897	NKX3-1,NOTCH1,BHLHE40,COBL,MESP1
16_Summary	GO Cellular Components	GO:0000323	lytic vacuole	-3.60283	-1.10825	14/729	47,55,162,290,1534,1803,2629,5873,6813,10053,10383,27163,54468,252839,51368,334,3163,10788	ACLY,ACP3,AP1B1,ANPEP,CYB561,DPP4,GBA,RAB27A,STXBP2,AP1M2,TUBB4B,NAAA,MIOS,TMEM9,TEX264,APLP2,HMOX2,IQGAP2
16_Member	GO Cellular Components	GO:0000323	lytic vacuole	-3.60283	-1.10825	14/729	47,55,162,290,1534,1803,2629,5873,6813,10053,10383,27163,54468,252839	ACLY,ACP3,AP1B1,ANPEP,CYB561,DPP4,GBA,RAB27A,STXBP2,AP1M2,TUBB4B,NAAA,MIOS,TMEM9
16_Member	GO Cellular Components	GO:0005764	lysosome	-3.60283	-1.10825	14/729	47,55,162,290,1534,1803,2629,5873,6813,10053,10383,27163,54468,252839	ACLY,ACP3,AP1B1,ANPEP,CYB561,DPP4,GBA,RAB27A,STXBP2,AP1M2,TUBB4B,NAAA,MIOS,TMEM9
16_Member	GO Cellular Components	GO:0005774	vacuolar membrane	-3.21312	-0.805695	10/447	55,162,290,1534,1803,2629,10053,51368,54468,252839	ACP3,AP1B1,ANPEP,CYB561,DPP4,GBA,AP1M2,TEX264,MIOS,TMEM9
16_Member	GO Cellular Components	GO:0005765	lysosomal membrane	-2.97484	-0.668249	9/398	55,162,290,1534,1803,2629,10053,54468,252839	ACP3,AP1B1,ANPEP,CYB561,DPP4,GBA,AP1M2,MIOS,TMEM9
16_Member	GO Cellular Components	GO:0098852	lytic vacuole membrane	-2.97484	-0.668249	9/398	55,162,290,1534,1803,2629,10053,54468,252839	ACP3,AP1B1,ANPEP,CYB561,DPP4,GBA,AP1M2,MIOS,TMEM9
16_Member	GO Cellular Components	GO:0030667	secretory granule membrane	-2.41217	-0.341294	7/311	55,290,334,1534,3163,5873,10788	ACP3,ANPEP,APLP2,CYB561,HMOX2,RAB27A,IQGAP2
17_Summary	GO Biological Processes	GO:0009066	aspartate family amino acid metabolic process	-3.57262	-1.08459	4/49	2806,6611,23464,27232,2937,23576,33,2954,129642,2746,3155,5091,334,55526,290,1718,143458	GOT2,SMS,GCAT,GNMT,GSS,DDAH1,ACADL,GSTZ1,MBOAT2,GLUD1,HMGCL,PC,APLP2,DHTKD1,ANPEP,DHCR24,LDLRAD3
17_Member	GO Biological Processes	GO:0009066	aspartate family amino acid metabolic process	-3.57262	-1.08459	4/49	2806,6611,23464,27232	GOT2,SMS,GCAT,GNMT
17_Member	GO Molecular Functions	GO:0016597	amino acid binding	-3.44068	-0.997254	4/53	2806,2937,23576,27232	GOT2,GSS,DDAH1,GNMT
17_Member	GO Biological Processes	GO:0006575	cellular modified amino acid metabolic process	-2.90245	-0.62608	6/186	33,2806,2937,2954,27232,129642	ACADL,GOT2,GSS,GSTZ1,GNMT,MBOAT2
17_Member	GO Molecular Functions	GO:0031406	carboxylic acid binding	-2.90245	-0.62608	6/186	2746,2806,2937,3155,5091,27232	GLUD1,GOT2,GSS,HMGCL,PC,GNMT
17_Member	GO Molecular Functions	GO:1901681	sulfur compound binding	-2.78036	-0.555555	7/267	33,334,2937,3155,5091,27232,55526	ACADL,APLP2,GSS,HMGCL,PC,GNMT,DHTKD1
17_Member	GO Molecular Functions	GO:0043177	organic acid binding	-2.63504	-0.472694	5/144	2806,2937,5091,23576,27232	GOT2,GSS,PC,DDAH1,GNMT
17_Member	GO Molecular Functions	GO:0033218	amide binding	-2.29978	-0.274053	8/412	33,290,1718,2937,3155,5091,27232,143458	ACADL,ANPEP,DHCR24,GSS,HMGCL,PC,GNMT,LDLRAD3
18_Summary	GO Biological Processes	GO:0016973	poly(A)+ mRNA export from nucleus	-3.5569	-1.08004	3/23	8106,8888,10482,10212,9284,9866,10013,10057,199223	PABPN1,MCM3AP,NXF1,DDX39A,NPIPA1,TRIM66,HDAC6,ABCC5,TTC21A
18_Member	GO Biological Processes	GO:0016973	poly(A)+ mRNA export from nucleus	-3.5569	-1.08004	3/23	8106,8888,10482	PABPN1,MCM3AP,NXF1
18_Member	GO Biological Processes	GO:0006406	mRNA export from nucleus	-3.47706	-1.02277	4/59	8106,8888,10212,10482	PABPN1,MCM3AP,DDX39A,NXF1
18_Member	GO Biological Processes	GO:0071427	mRNA-containing ribonucleoprotein complex export from nucleus	-3.47706	-1.02277	4/59	8106,8888,10212,10482	PABPN1,MCM3AP,DDX39A,NXF1
18_Member	GO Biological Processes	GO:0051028	mRNA transport	-3.0829	-0.73027	5/130	8106,8888,9284,10212,10482	PABPN1,MCM3AP,NPIPA1,DDX39A,NXF1
18_Member	GO Cellular Components	GO:0016234	inclusion body	-3.05881	-0.7155	4/76	8106,9866,10013,10482	PABPN1,TRIM66,HDAC6,NXF1
18_Member	GO Biological Processes	GO:0071426	ribonucleoprotein complex export from nucleus	-3.05881	-0.7155	4/76	8106,8888,10212,10482	PABPN1,MCM3AP,DDX39A,NXF1
18_Member	GO Biological Processes	GO:0071166	ribonucleoprotein complex localization	-3.03751	-0.710909	4/77	8106,8888,10212,10482	PABPN1,MCM3AP,DDX39A,NXF1
18_Member	GO Biological Processes	GO:0006405	RNA export from nucleus	-2.89654	-0.623808	4/84	8106,8888,10212,10482	PABPN1,MCM3AP,DDX39A,NXF1
18_Member	GO Biological Processes	GO:0015931	nucleobase-containing compound transport	-2.79195	-0.557702	6/223	8106,8888,9284,10057,10212,10482	PABPN1,MCM3AP,NPIPA1,ABCC5,DDX39A,NXF1
18_Member	GO Biological Processes	GO:0050657	nucleic acid transport	-2.6484	-0.48118	5/163	8106,8888,9284,10212,10482	PABPN1,MCM3AP,NPIPA1,DDX39A,NXF1
18_Member	GO Biological Processes	GO:0050658	RNA transport	-2.6484	-0.48118	5/163	8106,8888,9284,10212,10482	PABPN1,MCM3AP,NPIPA1,DDX39A,NXF1
18_Member	GO Biological Processes	GO:0051236	establishment of RNA localization	-2.61408	-0.458183	5/166	8106,8888,9284,10212,10482	PABPN1,MCM3AP,NPIPA1,DDX39A,NXF1
18_Member	GO Biological Processes	GO:0006403	RNA localization	-2.25222	-0.252485	5/202	8106,8888,9284,10212,10482	PABPN1,MCM3AP,NPIPA1,DDX39A,NXF1
18_Member	GO Biological Processes	GO:0031503	protein-containing complex localization	-2.0995	-0.154127	5/220	8106,8888,10212,10482,199223	PABPN1,MCM3AP,DDX39A,NXF1,TTC21A
19_Summary	GO Biological Processes	GO:0044782	cilium organization	-3.41449	-0.976395	9/394	2622,5116,8558,10013,22897,25981,27148,118491,199223,23162,90990,114327,100287171,9727	GAS8,PCNT,CDK10,HDAC6,CEP164,DNAH1,STK36,CFAP70,TTC21A,MAPK8IP3,KIFC2,EFHC1,WASHC1,RAB11FIP3
19_Member	GO Biological Processes	GO:0044782	cilium organization	-3.41449	-0.976395	9/394	2622,5116,8558,10013,22897,25981,27148,118491,199223	GAS8,PCNT,CDK10,HDAC6,CEP164,DNAH1,STK36,CFAP70,TTC21A
19_Member	GO Biological Processes	GO:0060271	cilium assembly	-2.98319	-0.668702	8/364	2622,5116,8558,10013,22897,25981,27148,118491	GAS8,PCNT,CDK10,HDAC6,CEP164,DNAH1,STK36,CFAP70
19_Member	GO Biological Processes	GO:0007018	microtubule-based movement	-2.82887	-0.584172	8/385	2622,10013,23162,25981,27148,90990,118491,199223	GAS8,HDAC6,MAPK8IP3,DNAH1,STK36,KIFC2,CFAP70,TTC21A
19_Member	GO Cellular Components	GO:0032838	plasma membrane bounded cell projection cytoplasm	-2.75297	-0.546486	6/227	2622,10013,23162,25981,114327,118491	GAS8,HDAC6,MAPK8IP3,DNAH1,EFHC1,CFAP70
19_Member	GO Biological Processes	GO:0003341	cilium movement	-2.51536	-0.39898	5/175	2622,25981,27148,118491,199223	GAS8,DNAH1,STK36,CFAP70,TTC21A
19_Member	GO Cellular Components	GO:0099568	cytoplasmic region	-2.36524	-0.312181	6/272	2622,10013,23162,25981,114327,118491	GAS8,HDAC6,MAPK8IP3,DNAH1,EFHC1,CFAP70
19_Member	GO Biological Processes	GO:0120031	plasma membrane bounded cell projection assembly	-2.34606	-0.303779	9/564	2622,5116,8558,10013,22897,25981,27148,118491,100287171	GAS8,PCNT,CDK10,HDAC6,CEP164,DNAH1,STK36,CFAP70,WASHC1
19_Member	GO Biological Processes	GO:0030031	cell projection assembly	-2.2779	-0.269352	9/578	2622,5116,8558,10013,22897,25981,27148,118491,100287171	GAS8,PCNT,CDK10,HDAC6,CEP164,DNAH1,STK36,CFAP70,WASHC1
19_Member	GO Biological Processes	GO:0061512	protein localization to cilium	-2.23904	-0.246963	3/65	2622,9727,199223	GAS8,RAB11FIP3,TTC21A
19_Member	GO Cellular Components	GO:0005930	axoneme	-2.1891	-0.212284	4/132	2622,25981,114327,118491	GAS8,DNAH1,EFHC1,CFAP70
19_Member	GO Cellular Components	GO:0097014	ciliary plasm	-2.16638	-0.200078	4/134	2622,25981,114327,118491	GAS8,DNAH1,EFHC1,CFAP70
19_Member	GO Biological Processes	GO:0001539	cilium or flagellum-dependent cell motility	-2.12212	-0.169878	4/138	2622,25981,114327,199223	GAS8,DNAH1,EFHC1,TTC21A
19_Member	GO Biological Processes	GO:0060285	cilium-dependent cell motility	-2.12212	-0.169878	4/138	2622,25981,114327,199223	GAS8,DNAH1,EFHC1,TTC21A
20_Summary	GO Biological Processes	GO:0006576	cellular biogenic amine metabolic process	-3.30384	-0.881343	5/102	18,6611,25953,27163,51686	ABAT,SMS,PNKD,NAAA,OAZ3
20_Member	GO Biological Processes	GO:0006576	cellular biogenic amine metabolic process	-3.30384	-0.881343	5/102	18,6611,25953,27163,51686	ABAT,SMS,PNKD,NAAA,OAZ3
20_Member	GO Biological Processes	GO:0044106	cellular amine metabolic process	-3.08426	-0.73027	5/114	18,6611,25953,27163,51686	ABAT,SMS,PNKD,NAAA,OAZ3
20_Member	GO Biological Processes	GO:0009308	amine metabolic process	-3.00046	-0.681972	5/119	18,6611,25953,27163,51686	ABAT,SMS,PNKD,NAAA,OAZ3

## Sheet: GSE70768.KEGG
GroupID	Category	Term	Description	LogP	Log(q-value)	InTerm_InList	Genes	Symbols
1_Summary	KEGG Pathway	ko04978	Mineral absorption	-6.06474	-3.36564	6/51	1811,3163,4493,4494,4495,4499	SLC26A3,HMOX2,MT1E,MT1F,MT1G,MT1M
1_Member	KEGG Pathway	ko04978	Mineral absorption	-6.06474	-3.36564	6/51	1811,3163,4493,4494,4495,4499	SLC26A3,HMOX2,MT1E,MT1F,MT1G,MT1M
1_Member	KEGG Pathway	hsa04978	Mineral absorption	-5.96388	-3.36564	6/53	1811,3163,4493,4494,4495,4499	SLC26A3,HMOX2,MT1E,MT1F,MT1G,MT1M
2_Summary	KEGG Pathway	ko00220	Arginine biosynthesis	-5.06136	-2.67051	4/21	384,2746,2806,84706,18,5091	ARG2,GLUD1,GOT2,GPT2,ABAT,PC
2_Member	KEGG Pathway	ko00220	Arginine biosynthesis	-5.06136	-2.67051	4/21	384,2746,2806,84706	ARG2,GLUD1,GOT2,GPT2
2_Member	KEGG Pathway	hsa00220	Arginine biosynthesis	-4.42001	-2.29889	4/30	384,2746,2806,84706	ARG2,GLUD1,GOT2,GPT2
2_Member	KEGG Pathway	hsa00250	Alanine, aspartate and glutamate metabolism	-4.14961	-2.15342	4/35	18,2746,2806,84706	ABAT,GLUD1,GOT2,GPT2
2_Member	KEGG Pathway	ko00250	Alanine, aspartate and glutamate metabolism	-4.14961	-2.15342	4/35	18,2746,2806,84706	ABAT,GLUD1,GOT2,GPT2
2_Member	KEGG Pathway	hsa01230	Biosynthesis of amino acids	-2.86965	-1.09356	4/75	384,2806,5091,84706	ARG2,GOT2,PC,GPT2
2_Member	KEGG Pathway	ko01230	Biosynthesis of amino acids	-2.86965	-1.09356	4/75	384,2806,5091,84706	ARG2,GOT2,PC,GPT2
2_Member	KEGG Pathway	hsa01200	Carbon metabolism	-2.21305	-0.760937	4/114	2746,2806,5091,84706	GLUD1,GOT2,PC,GPT2
2_Member	KEGG Pathway	ko01200	Carbon metabolism	-2.21305	-0.760937	4/114	2746,2806,5091,84706	GLUD1,GOT2,PC,GPT2
3_Summary	KEGG Pathway	hsa00280	Valine, leucine and isoleucine degradation	-4.87081	-2.67051	5/48	18,30,3155,3712,27034	ABAT,ACAA1,HMGCL,IVD,ACAD8
3_Member	KEGG Pathway	hsa00280	Valine, leucine and isoleucine degradation	-4.87081	-2.67051	5/48	18,30,3155,3712,27034	ABAT,ACAA1,HMGCL,IVD,ACAD8
3_Member	KEGG Pathway	ko00280	Valine, leucine and isoleucine degradation	-4.87081	-2.67051	5/48	18,30,3155,3712,27034	ABAT,ACAA1,HMGCL,IVD,ACAD8
4_Summary	KEGG Pathway	hsa00410	beta-Alanine metabolism	-3.00179	-1.10252	3/31	18,220,6611	ABAT,ALDH1A3,SMS
4_Member	KEGG Pathway	hsa00410	beta-Alanine metabolism	-3.00179	-1.10252	3/31	18,220,6611	ABAT,ALDH1A3,SMS
4_Member	KEGG Pathway	ko00410	beta-Alanine metabolism	-3.00179	-1.10252	3/31	18,220,6611	ABAT,ALDH1A3,SMS
5_Summary	KEGG Pathway	hsa00350	Tyrosine metabolism	-2.84671	-1.09356	3/35	220,2806,2954	ALDH1A3,GOT2,GSTZ1
5_Member	KEGG Pathway	hsa00350	Tyrosine metabolism	-2.84671	-1.09356	3/35	220,2806,2954	ALDH1A3,GOT2,GSTZ1
5_Member	KEGG Pathway	ko00350	Tyrosine metabolism	-2.84671	-1.09356	3/35	220,2806,2954	ALDH1A3,GOT2,GSTZ1
6_Summary	KEGG Pathway	ko03015	mRNA surveillance pathway	-2.76811	-1.04492	4/91	8106,10482,22985,80336	PABPN1,NXF1,ACIN1,PABPC1L
6_Member	KEGG Pathway	ko03015	mRNA surveillance pathway	-2.76811	-1.04492	4/91	8106,10482,22985,80336	PABPN1,NXF1,ACIN1,PABPC1L
6_Member	KEGG Pathway	hsa03015	mRNA surveillance pathway	-2.71642	-1.02127	4/94	8106,10482,22985,80336	PABPN1,NXF1,ACIN1,PABPC1L
7_Summary	KEGG Pathway	hsa00270	Cysteine and methionine metabolism	-2.53082	-0.886822	3/45	2806,2937,6611,384,290	GOT2,GSS,SMS,ARG2,ANPEP
7_Member	KEGG Pathway	hsa00270	Cysteine and methionine metabolism	-2.53082	-0.886822	3/45	2806,2937,6611	GOT2,GSS,SMS
7_Member	KEGG Pathway	ko00270	Cysteine and methionine metabolism	-2.53082	-0.886822	3/45	2806,2937,6611	GOT2,GSS,SMS
7_Member	KEGG Pathway	hsa00330	Arginine and proline metabolism	-2.40062	-0.881559	3/50	384,2806,6611	ARG2,GOT2,SMS
7_Member	KEGG Pathway	ko00330	Arginine and proline metabolism	-2.40062	-0.881559	3/50	384,2806,6611	ARG2,GOT2,SMS
7_Member	KEGG Pathway	hsa00480	Glutathione metabolism	-2.3064	-0.822102	3/54	290,2937,6611	ANPEP,GSS,SMS
7_Member	KEGG Pathway	ko00480	Glutathione metabolism	-2.3064	-0.822102	3/54	290,2937,6611	ANPEP,GSS,SMS
8_Summary	KEGG Pathway	hsa01212	Fatty acid metabolism	-2.4509	-0.881559	3/48	30,33,54898	ACAA1,ACADL,ELOVL2
8_Member	KEGG Pathway	hsa01212	Fatty acid metabolism	-2.4509	-0.881559	3/48	30,33,54898	ACAA1,ACADL,ELOVL2
8_Member	KEGG Pathway	ko01212	Fatty acid metabolism	-2.4509	-0.881559	3/48	30,33,54898	ACAA1,ACADL,ELOVL2
9_Summary	KEGG Pathway	hsa05168	Herpes simplex infection	-2.41253	-0.881559	5/185	6430,6773,7297,8764,10482	SRSF5,STAT2,TYK2,TNFRSF14,NXF1
9_Member	KEGG Pathway	hsa05168	Herpes simplex infection	-2.41253	-0.881559	5/185	6430,6773,7297,8764,10482	SRSF5,STAT2,TYK2,TNFRSF14,NXF1
9_Member	KEGG Pathway	ko05168	Herpes simplex infection	-2.41253	-0.881559	5/185	6430,6773,7297,8764,10482	SRSF5,STAT2,TYK2,TNFRSF14,NXF1
10_Summary	KEGG Pathway	hsa03040	Spliceosome	-2.16638	-0.744232	4/134	6430,6625,9129,22985	SRSF5,SNRNP70,PRPF3,ACIN1
10_Member	KEGG Pathway	hsa03040	Spliceosome	-2.16638	-0.744232	4/134	6430,6625,9129,22985	SRSF5,SNRNP70,PRPF3,ACIN1
10_Member	KEGG Pathway	ko03040	Spliceosome	-2.16638	-0.744232	4/134	6430,6625,9129,22985	SRSF5,SNRNP70,PRPF3,ACIN1
